# Supplementary material for: Combined small RNA and degradome sequencing to identify miRNAs and their targets in response to drought in foxtail millet
Source: PubMed Central journal article supplement (PMC4828802; doi:10.1186/s12863-016-0364-7), 2016-04-12
Supplement: 12863_2016_364_MOESM5_ESM.pdf [file 12863_2016_364_MOESM5_ESM.pdf]

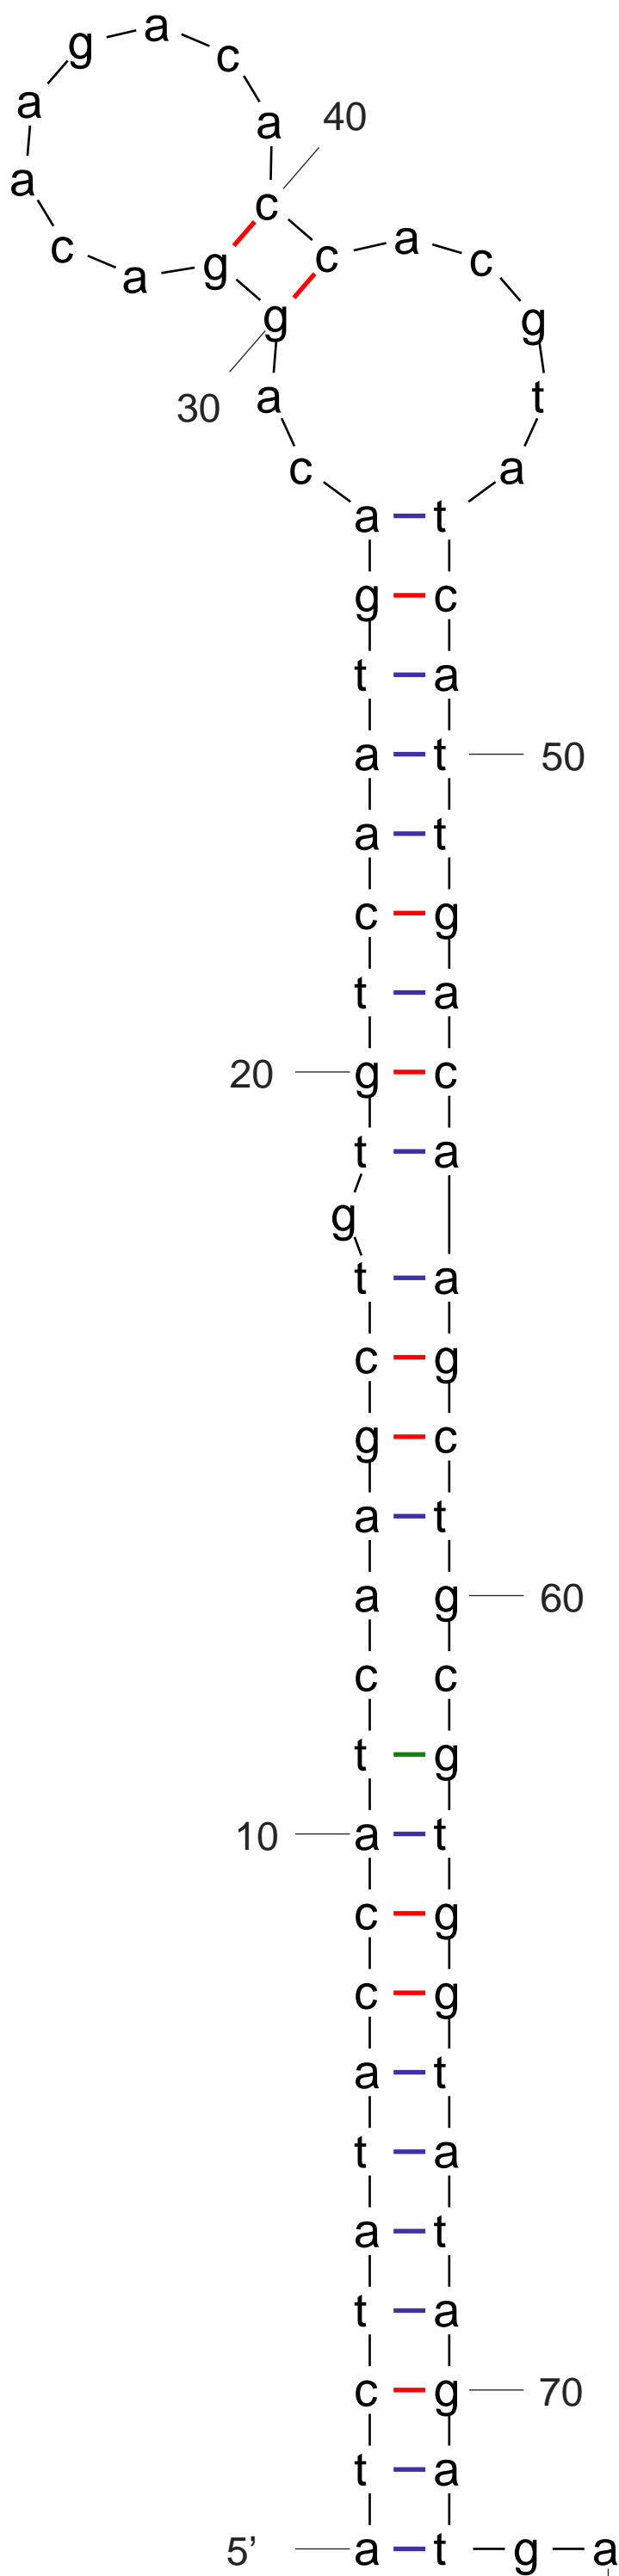

dG = -30.2 sit\_novel\_miR1



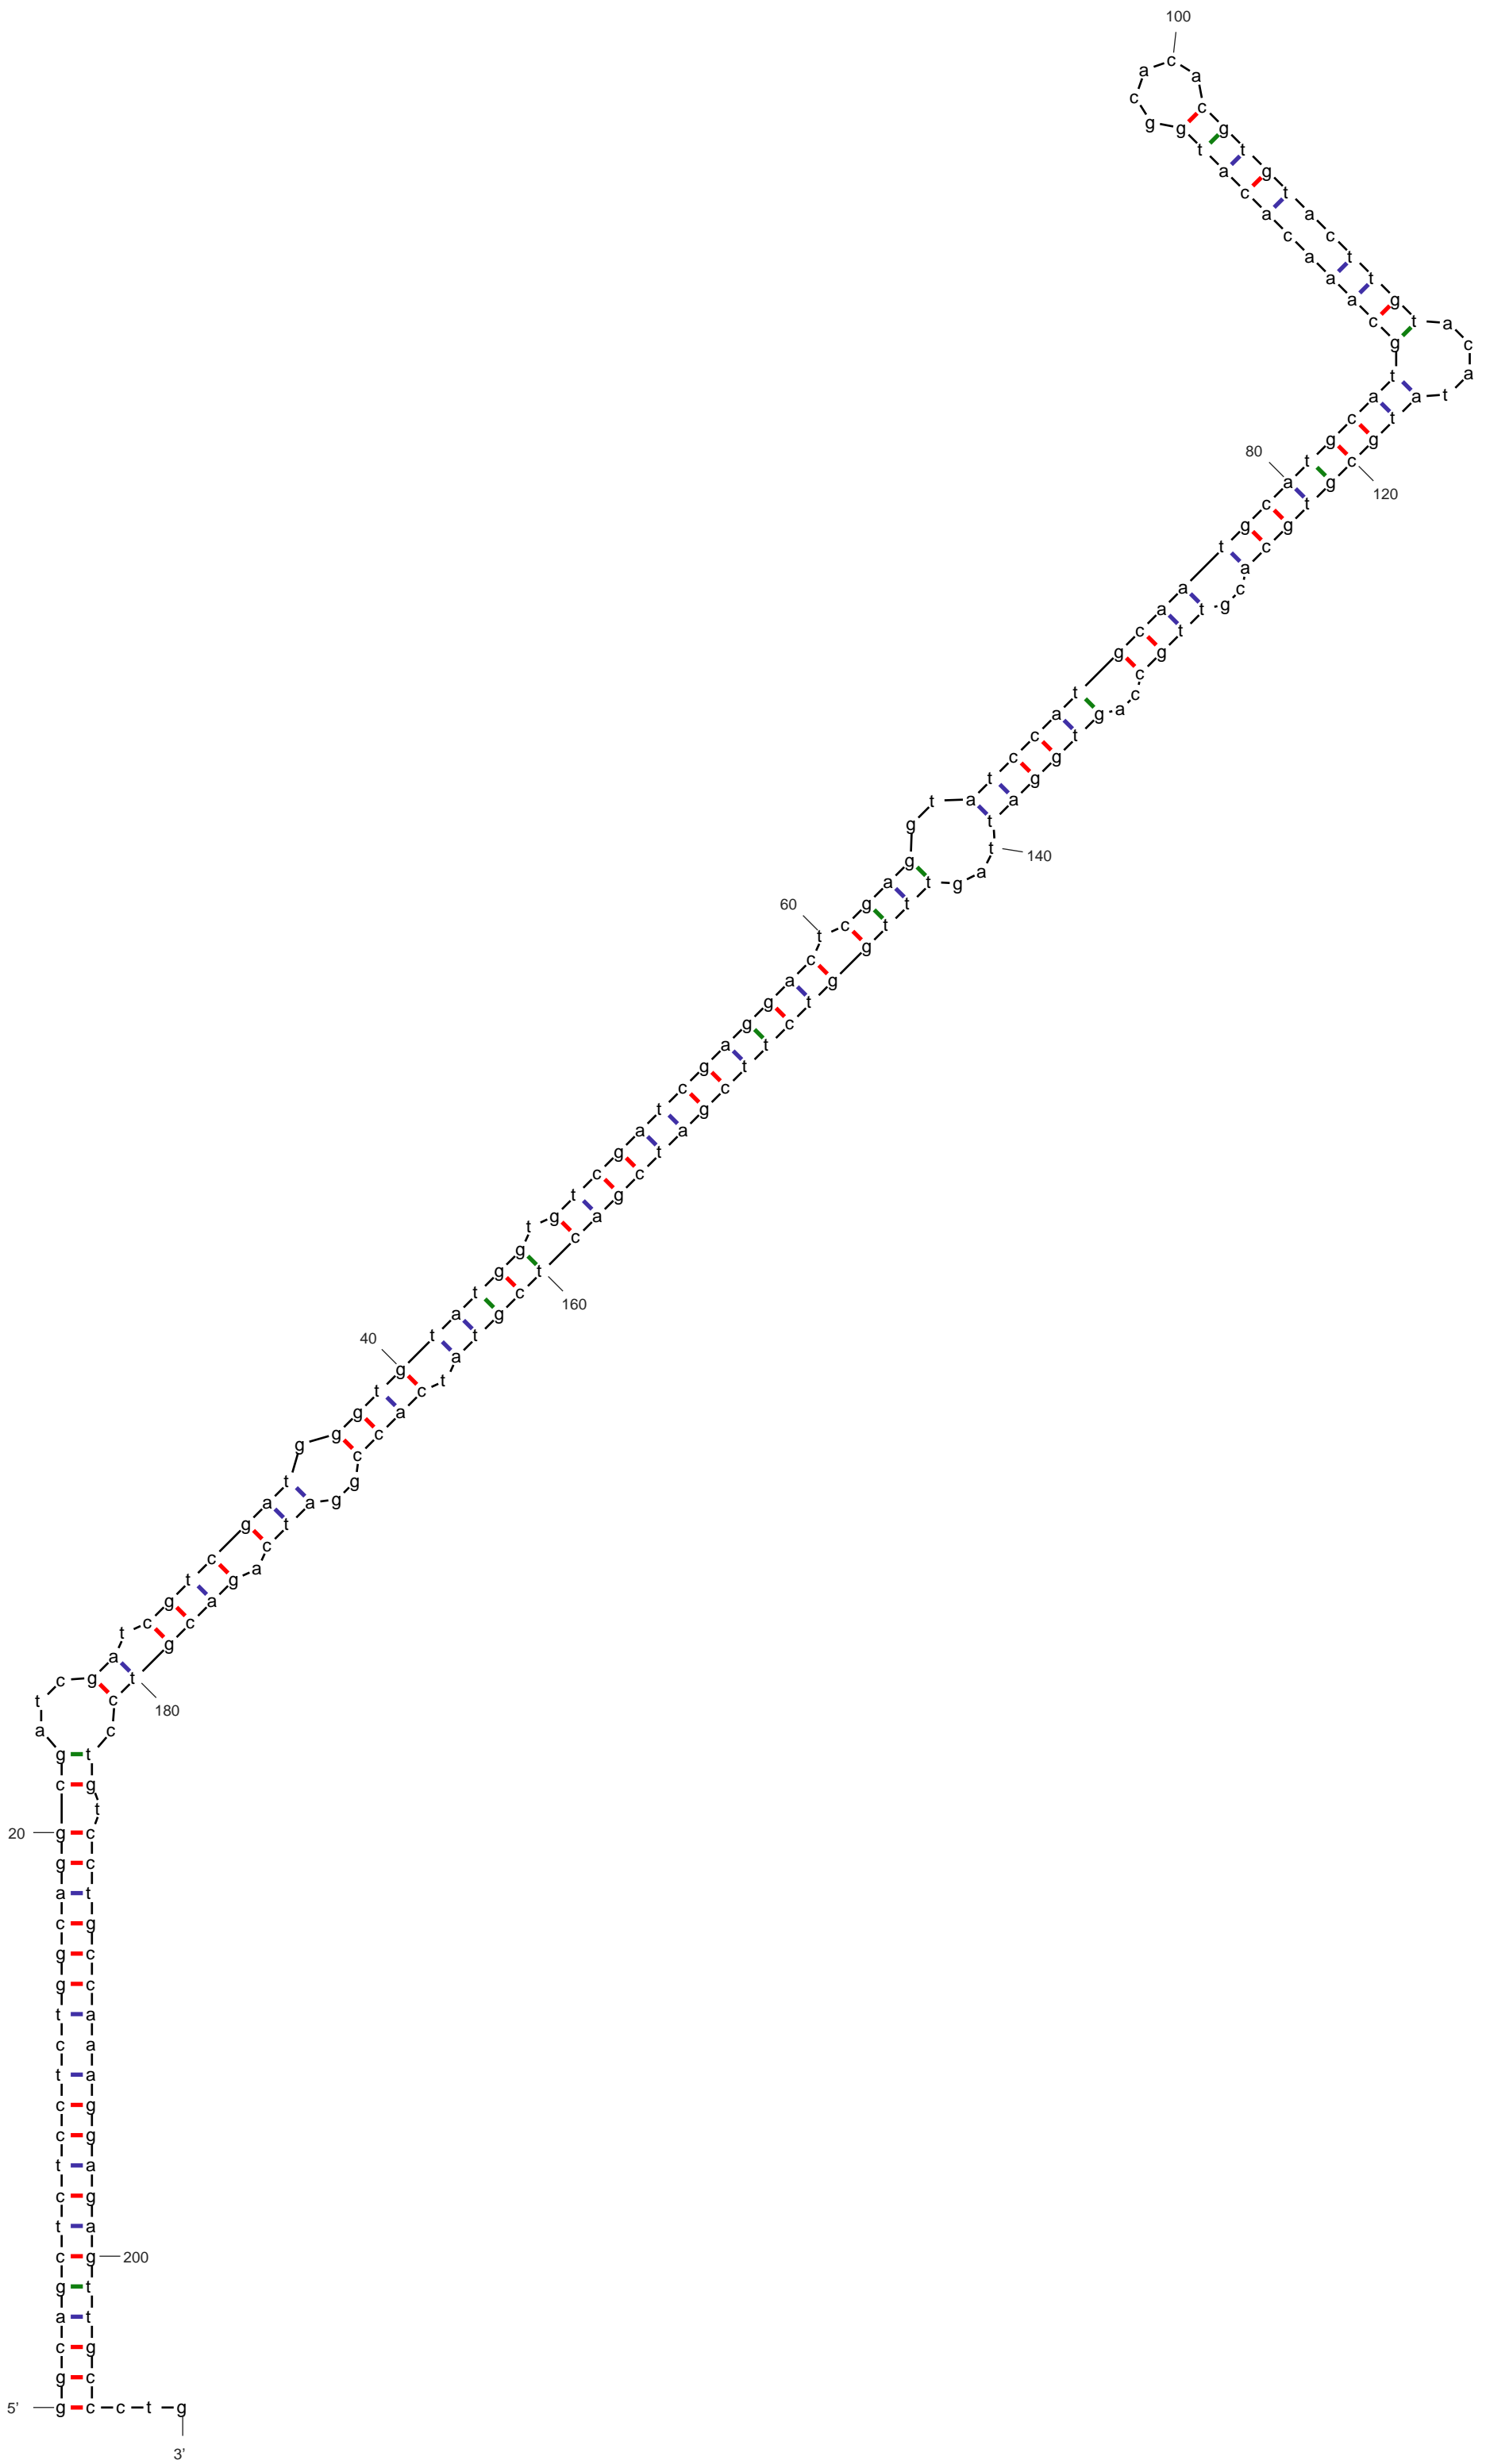

$dG = -109.7$  *sit\_novel\_miR3*

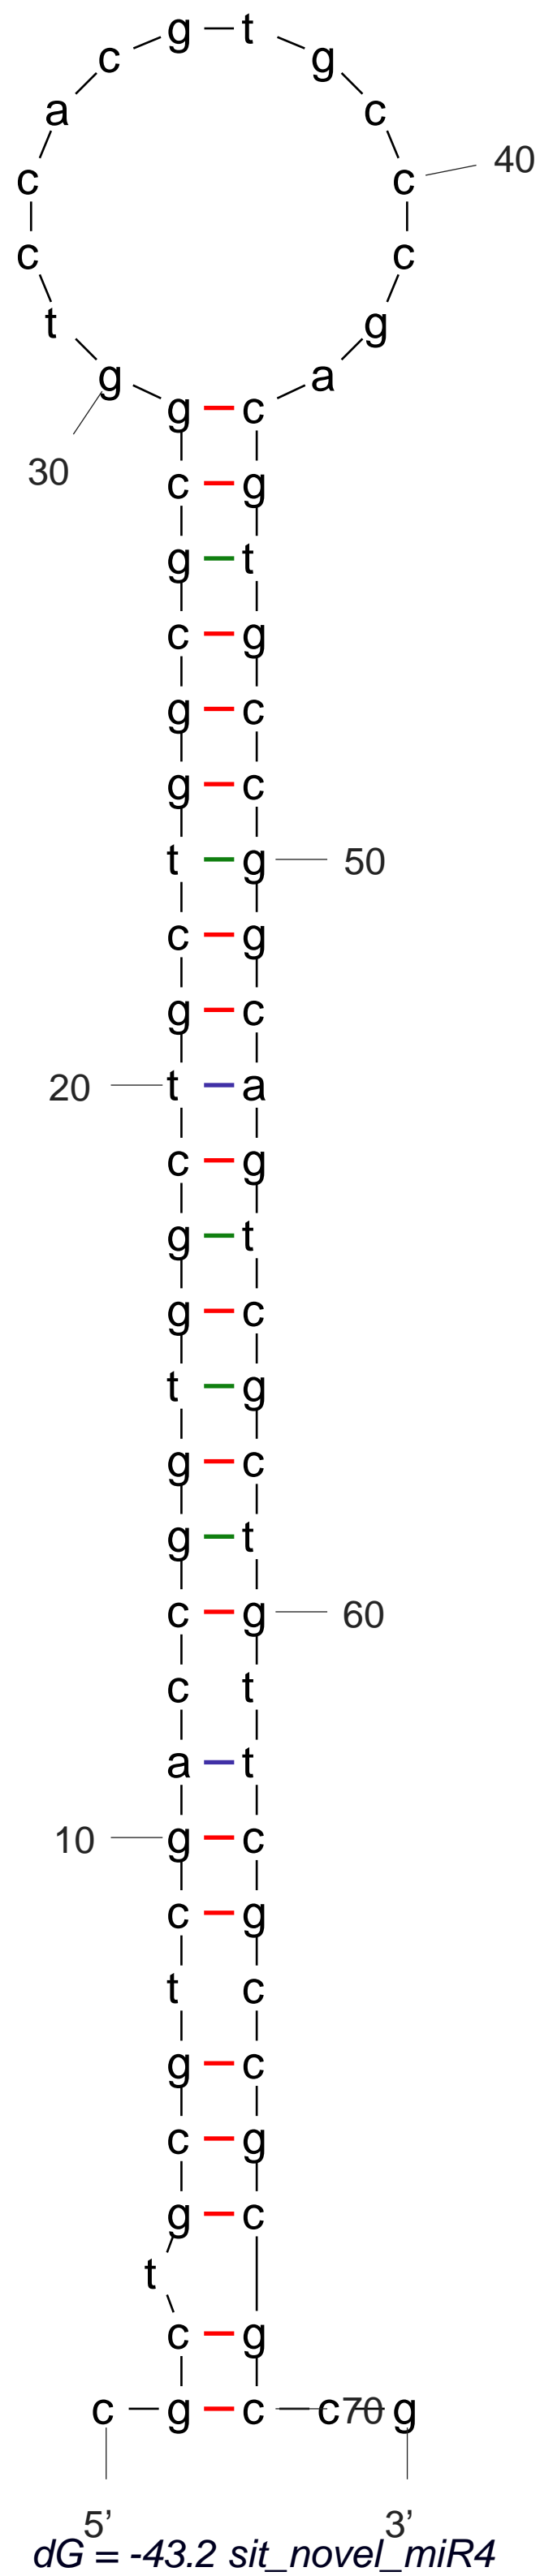

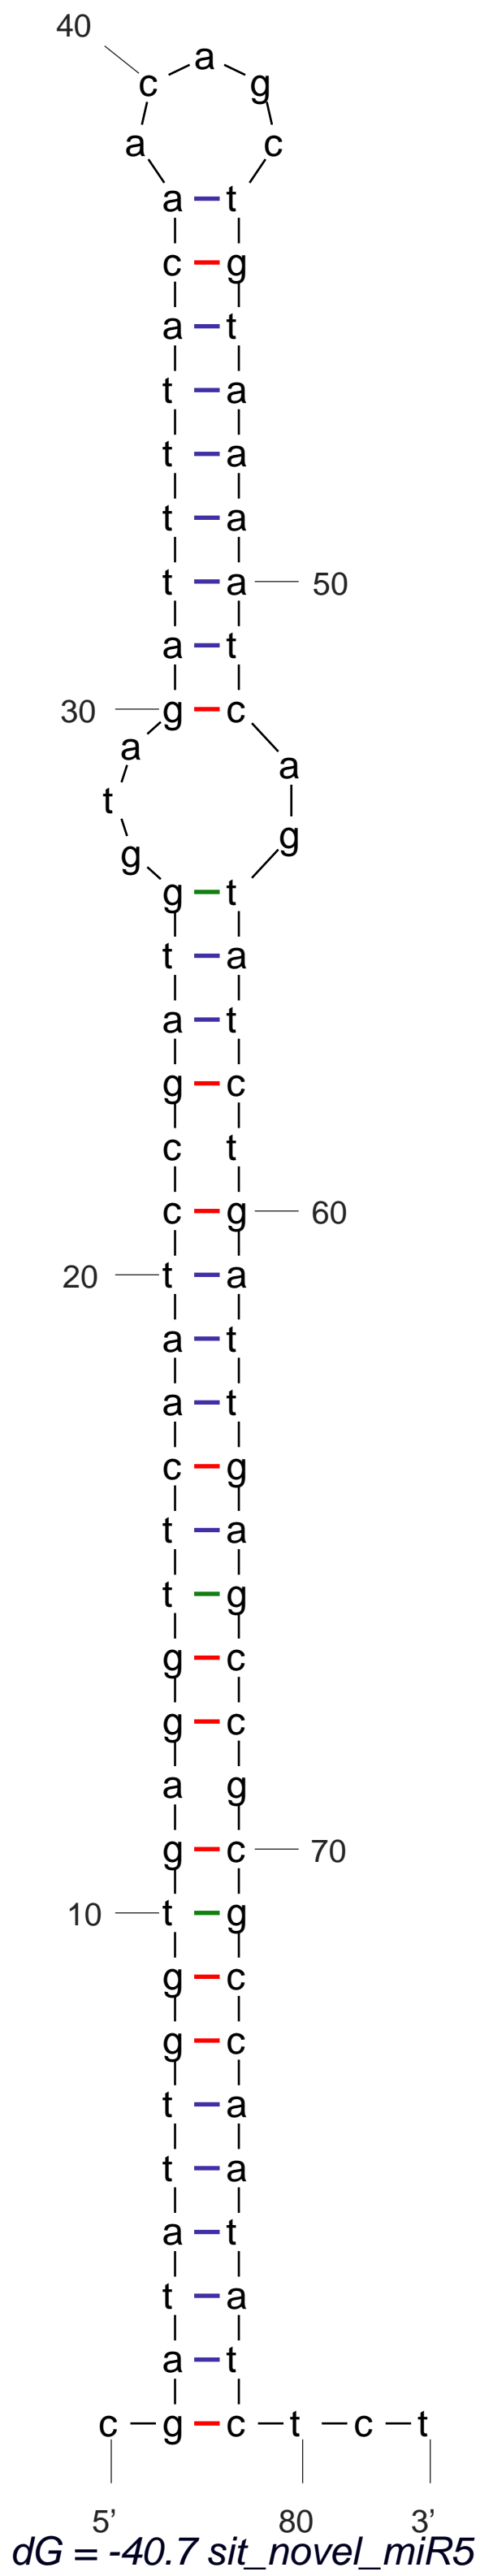

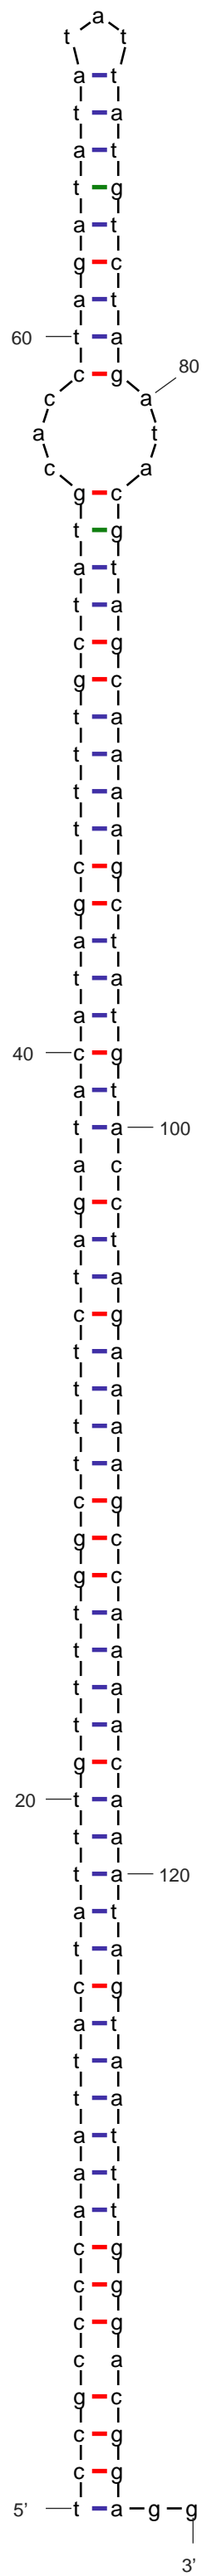

$dG = -92.2$  *sit\_novel\_miR6*







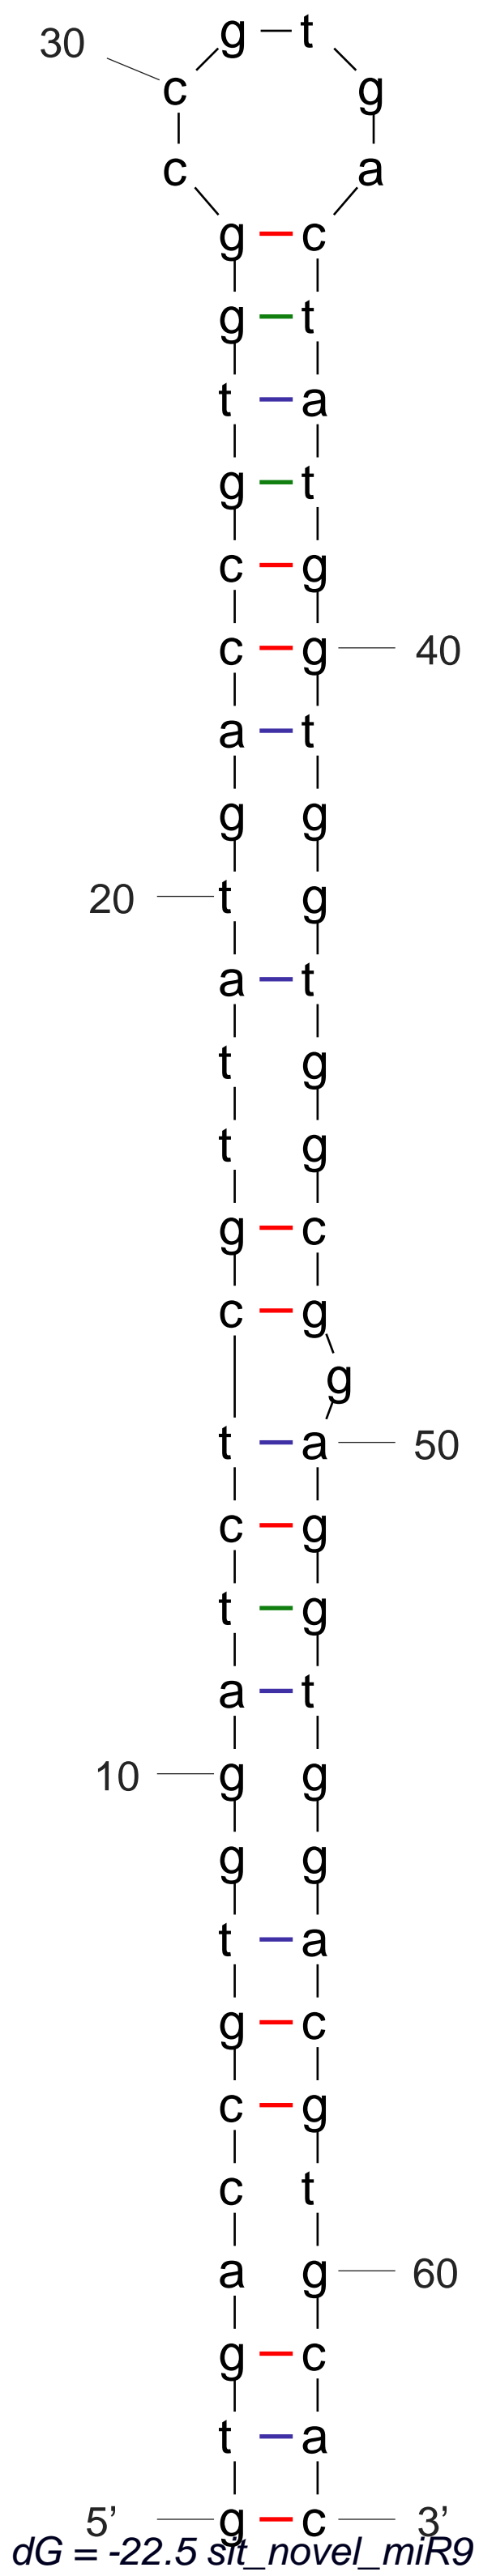

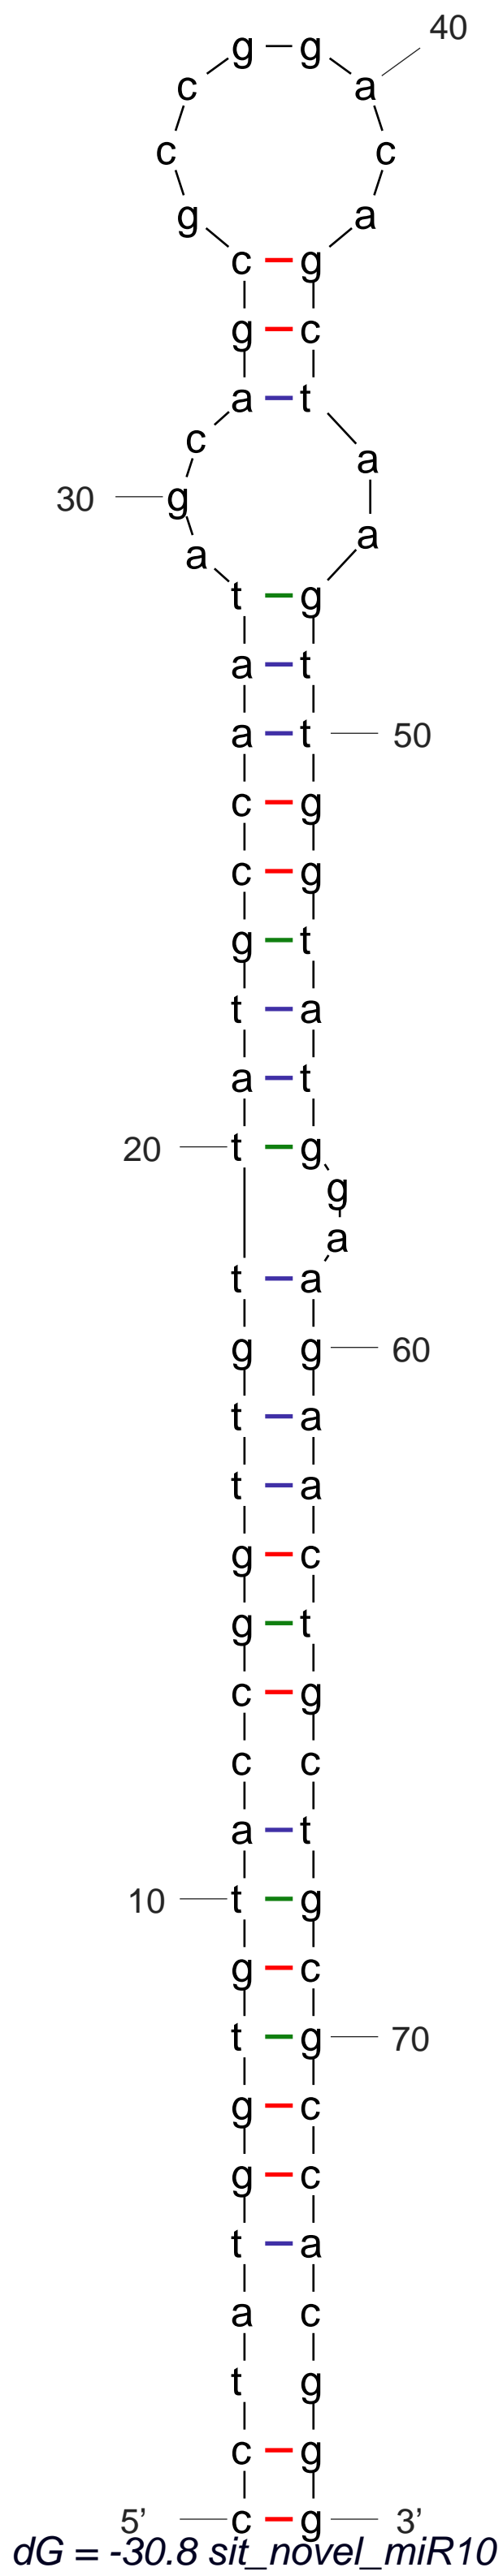

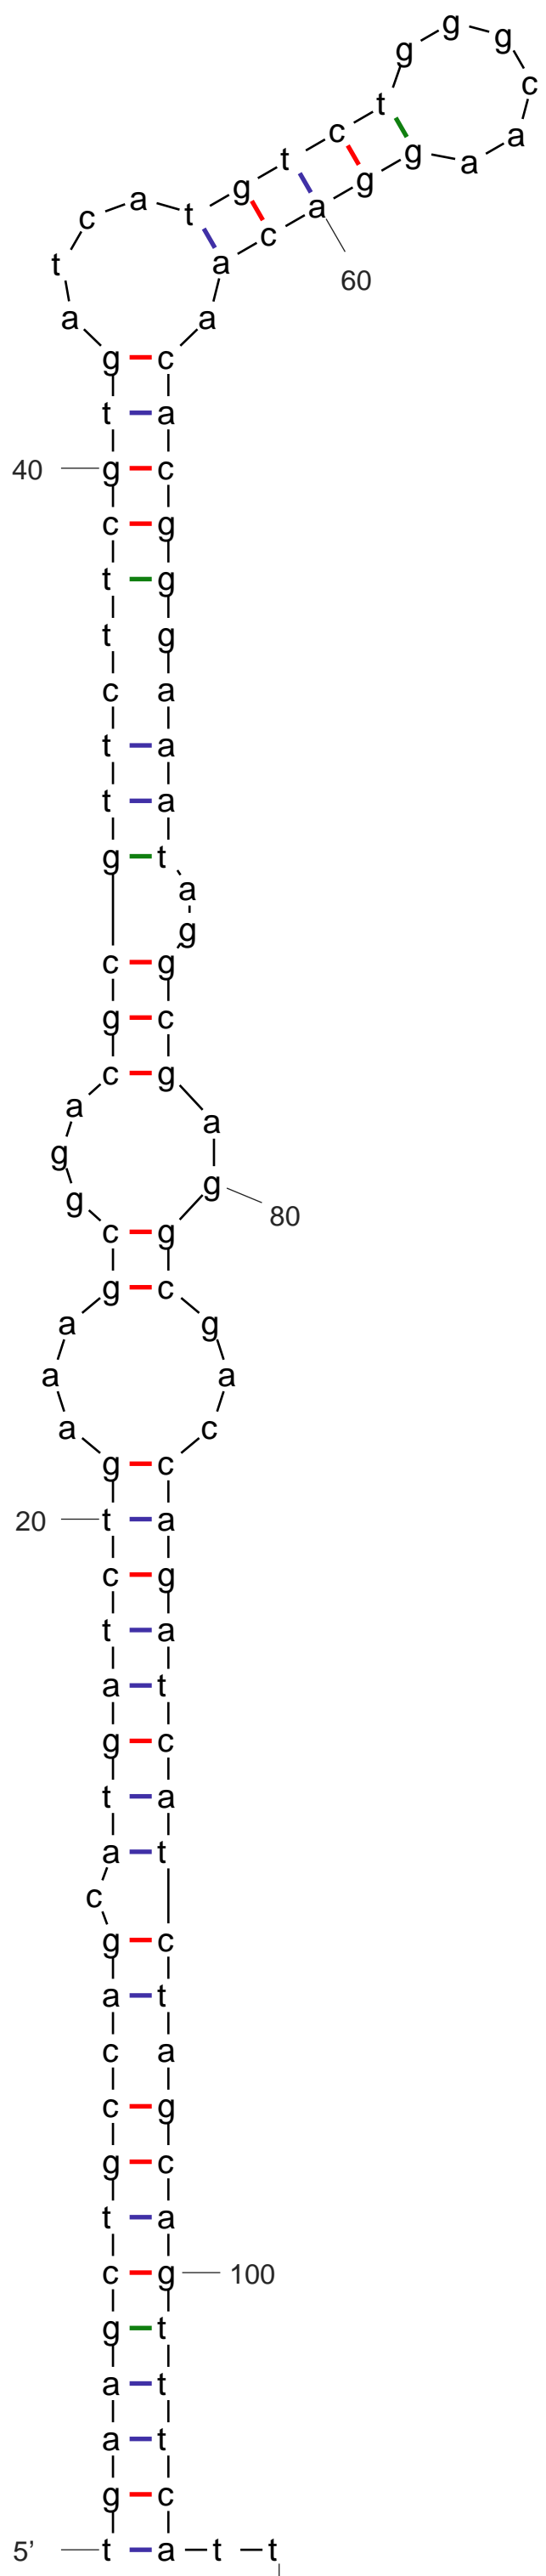

$dG = -41.6$  *sit\_novel\_miR11*

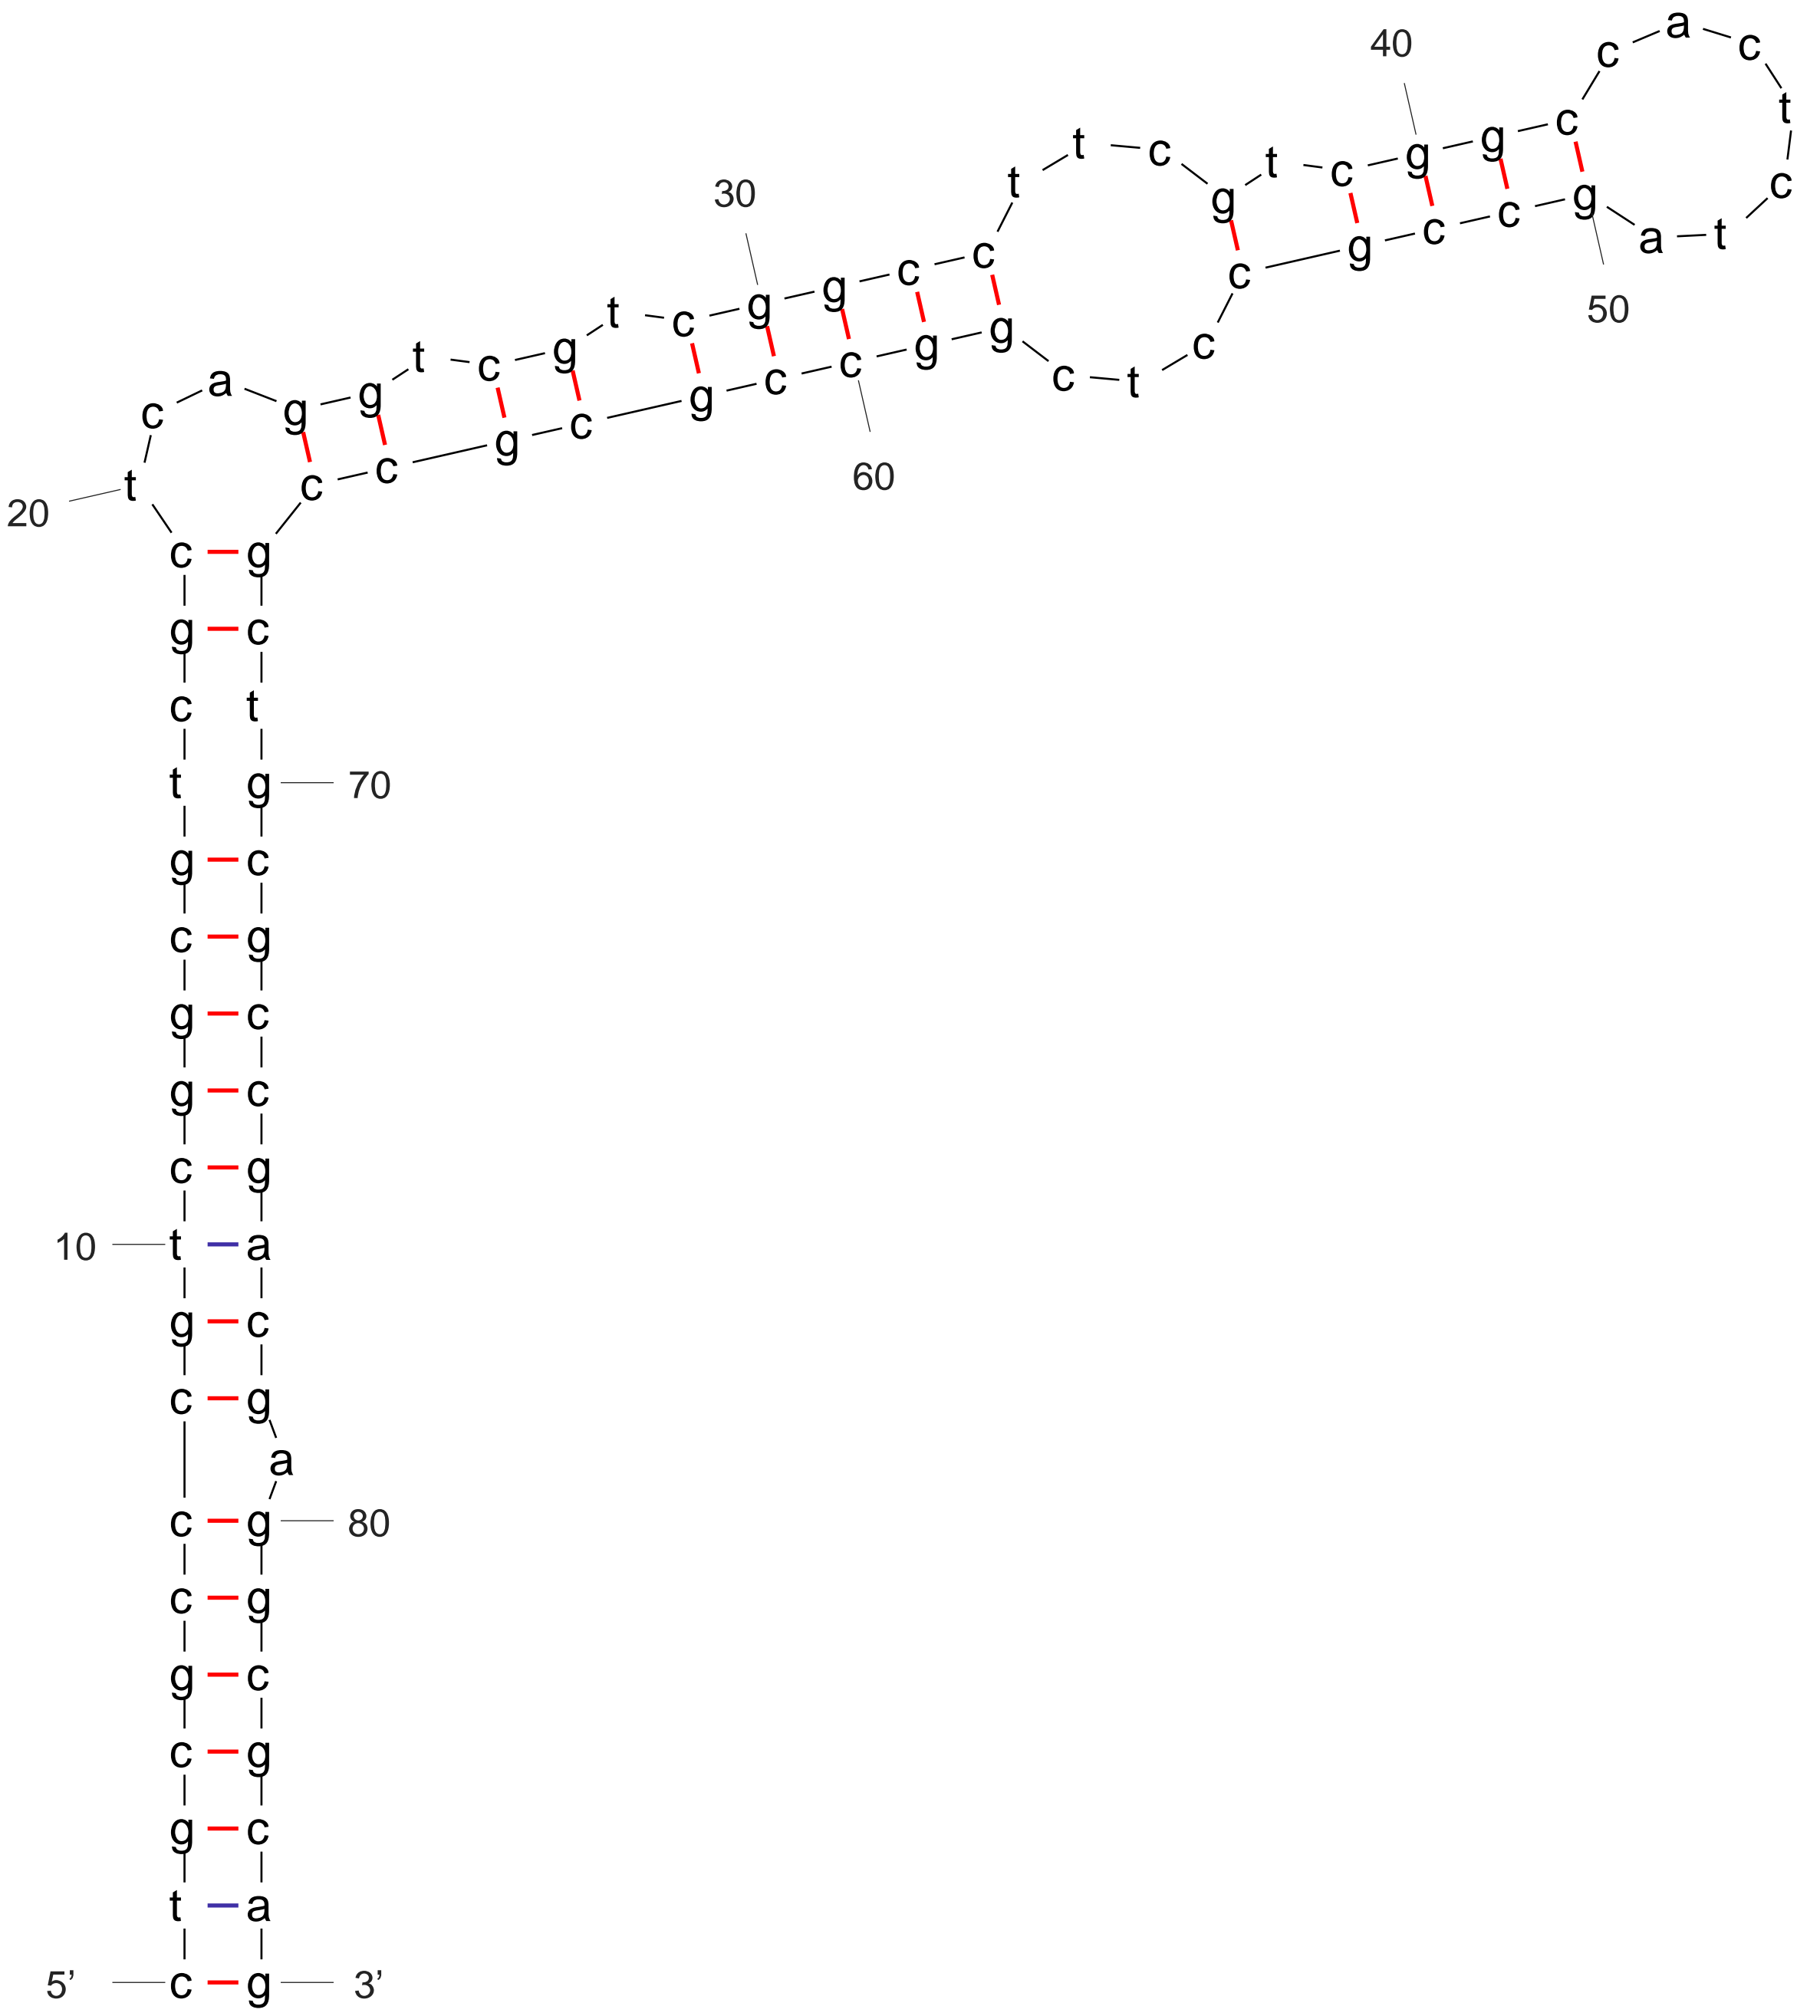

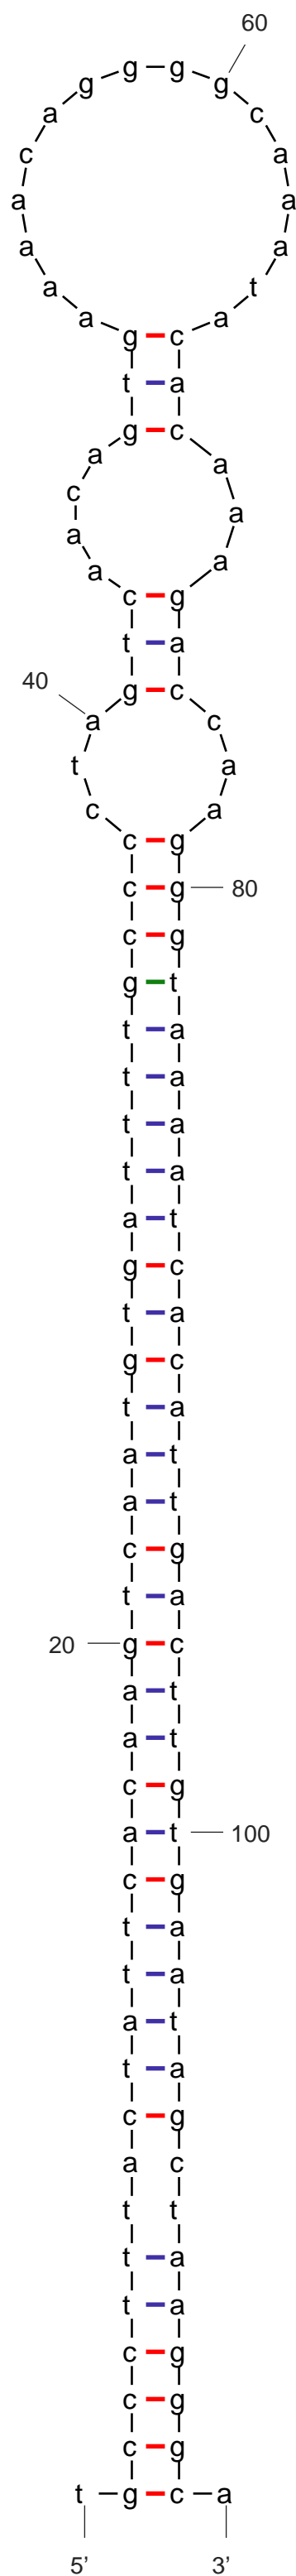

$dG = -60.6$  *sit\_novel\_miR13*

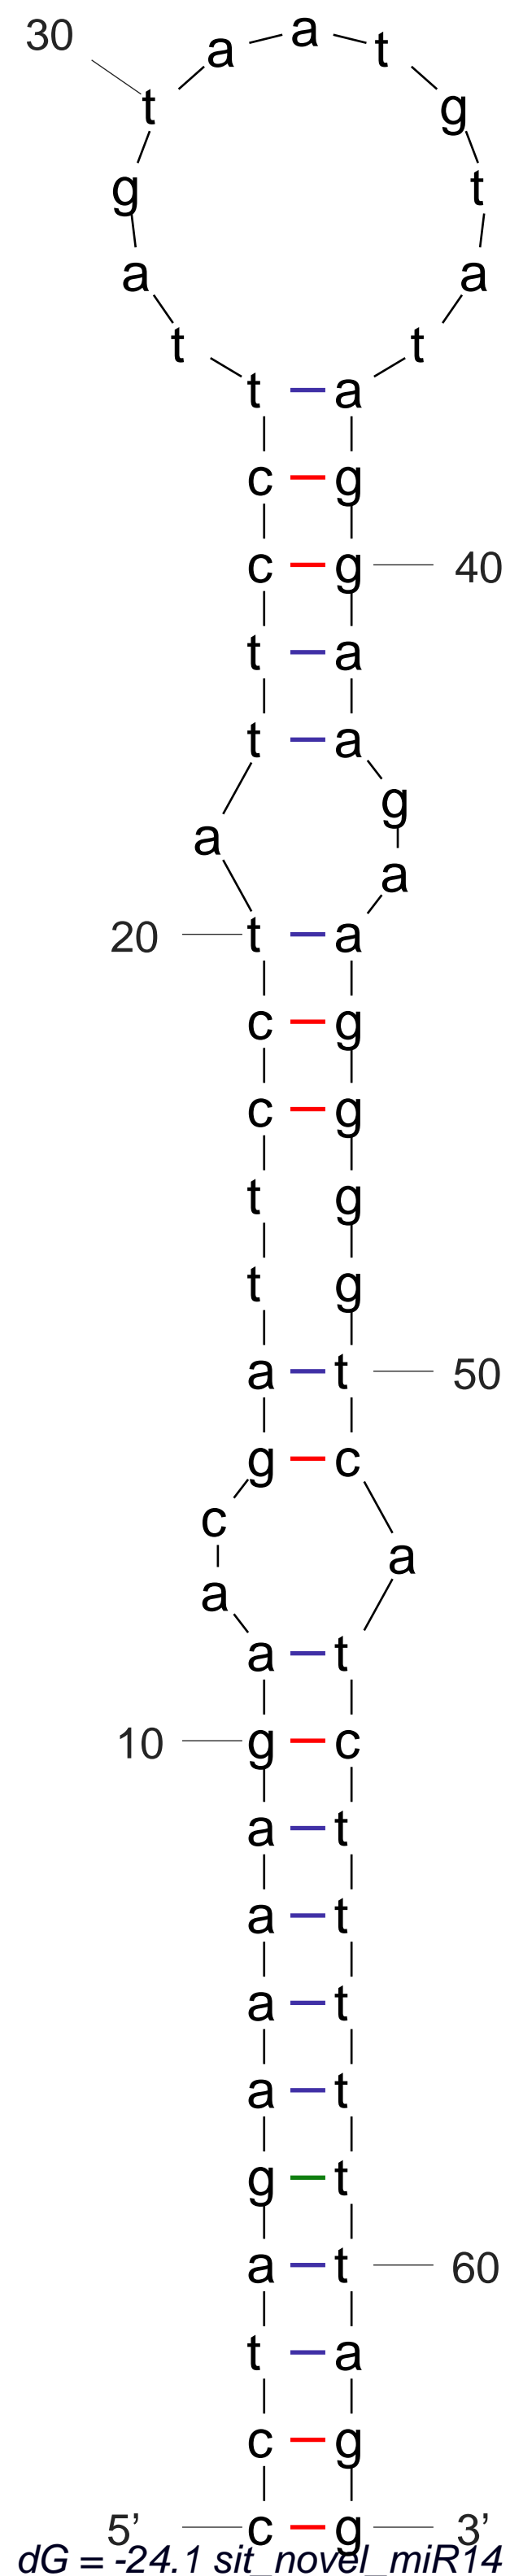

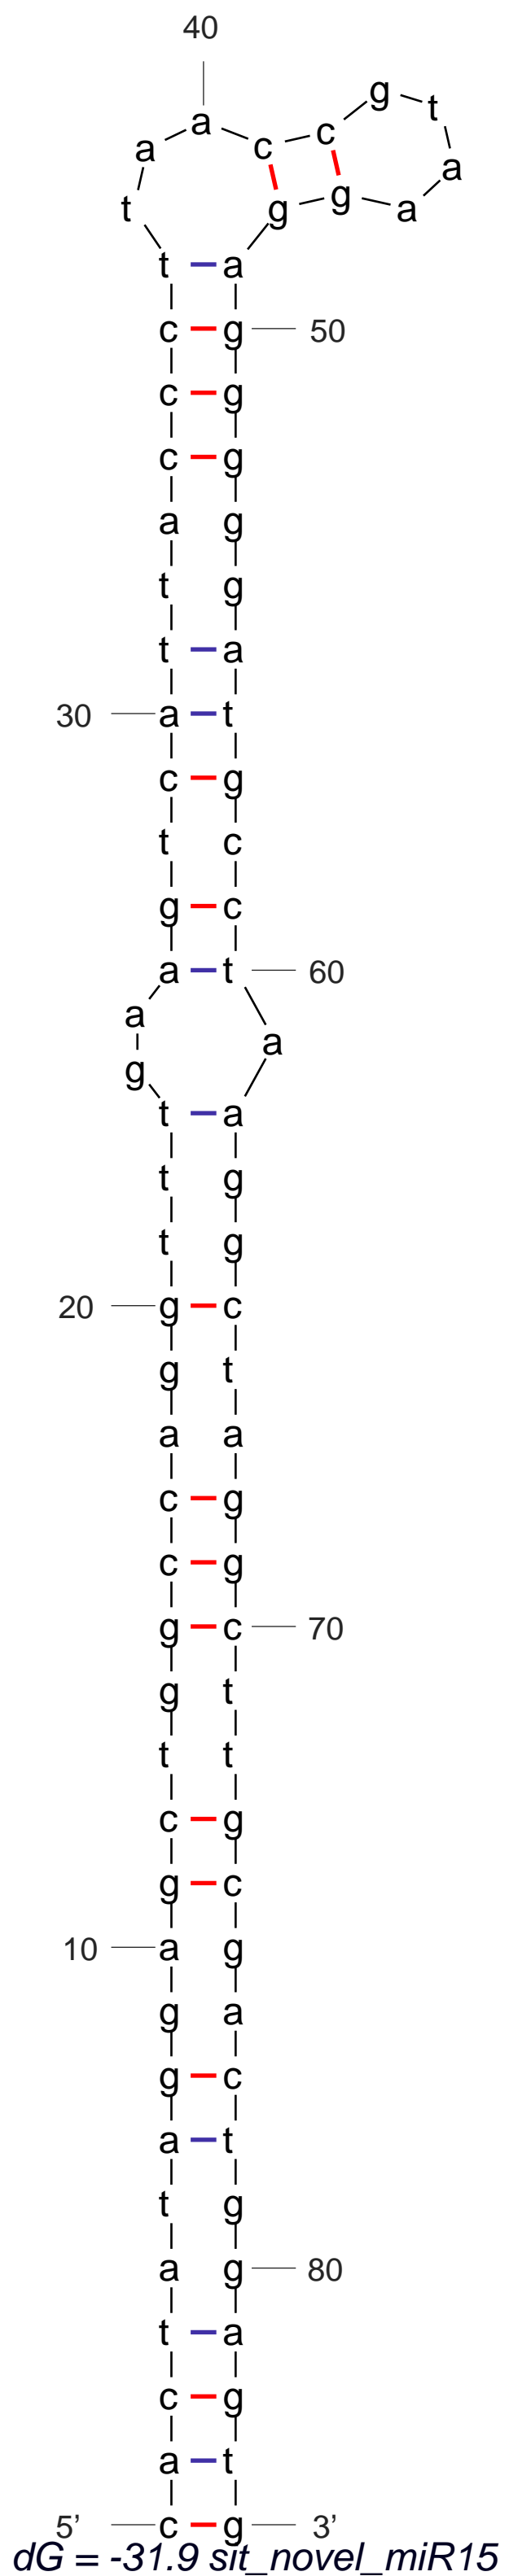

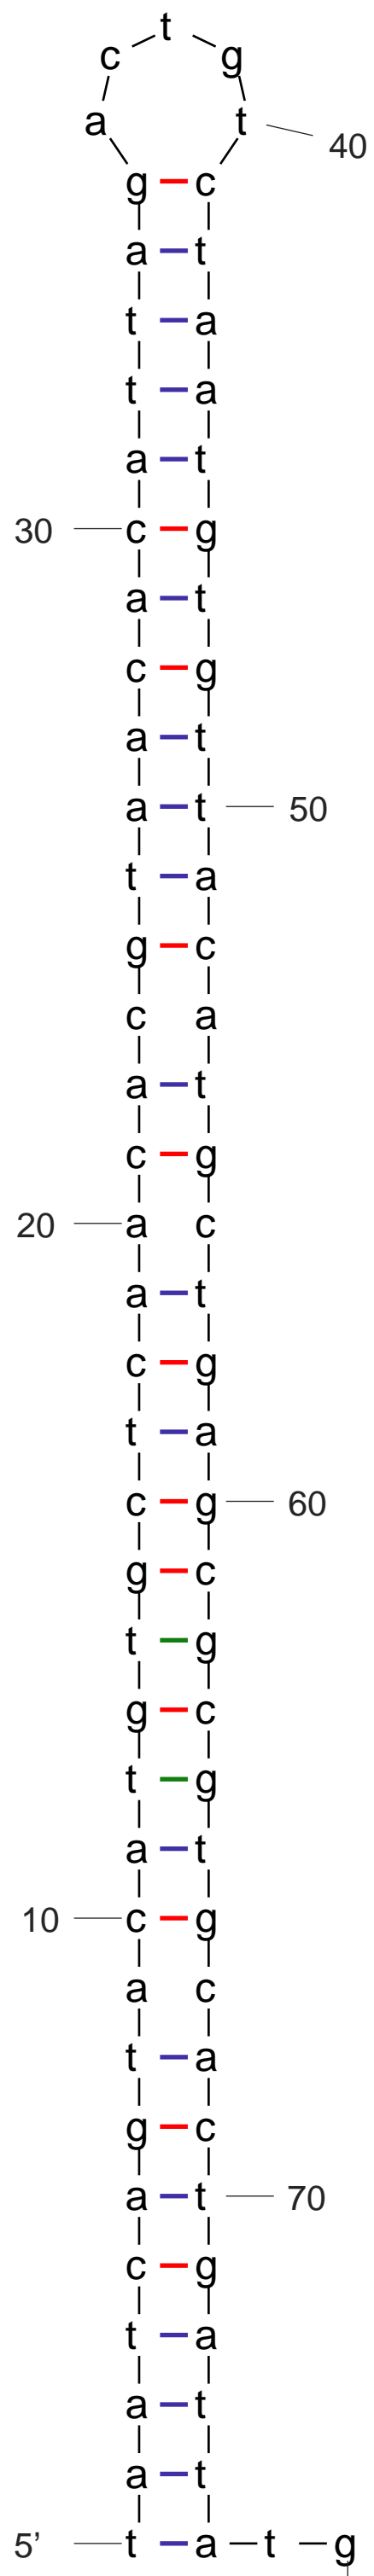

dG = -44.7 sit\_novel\_miR16



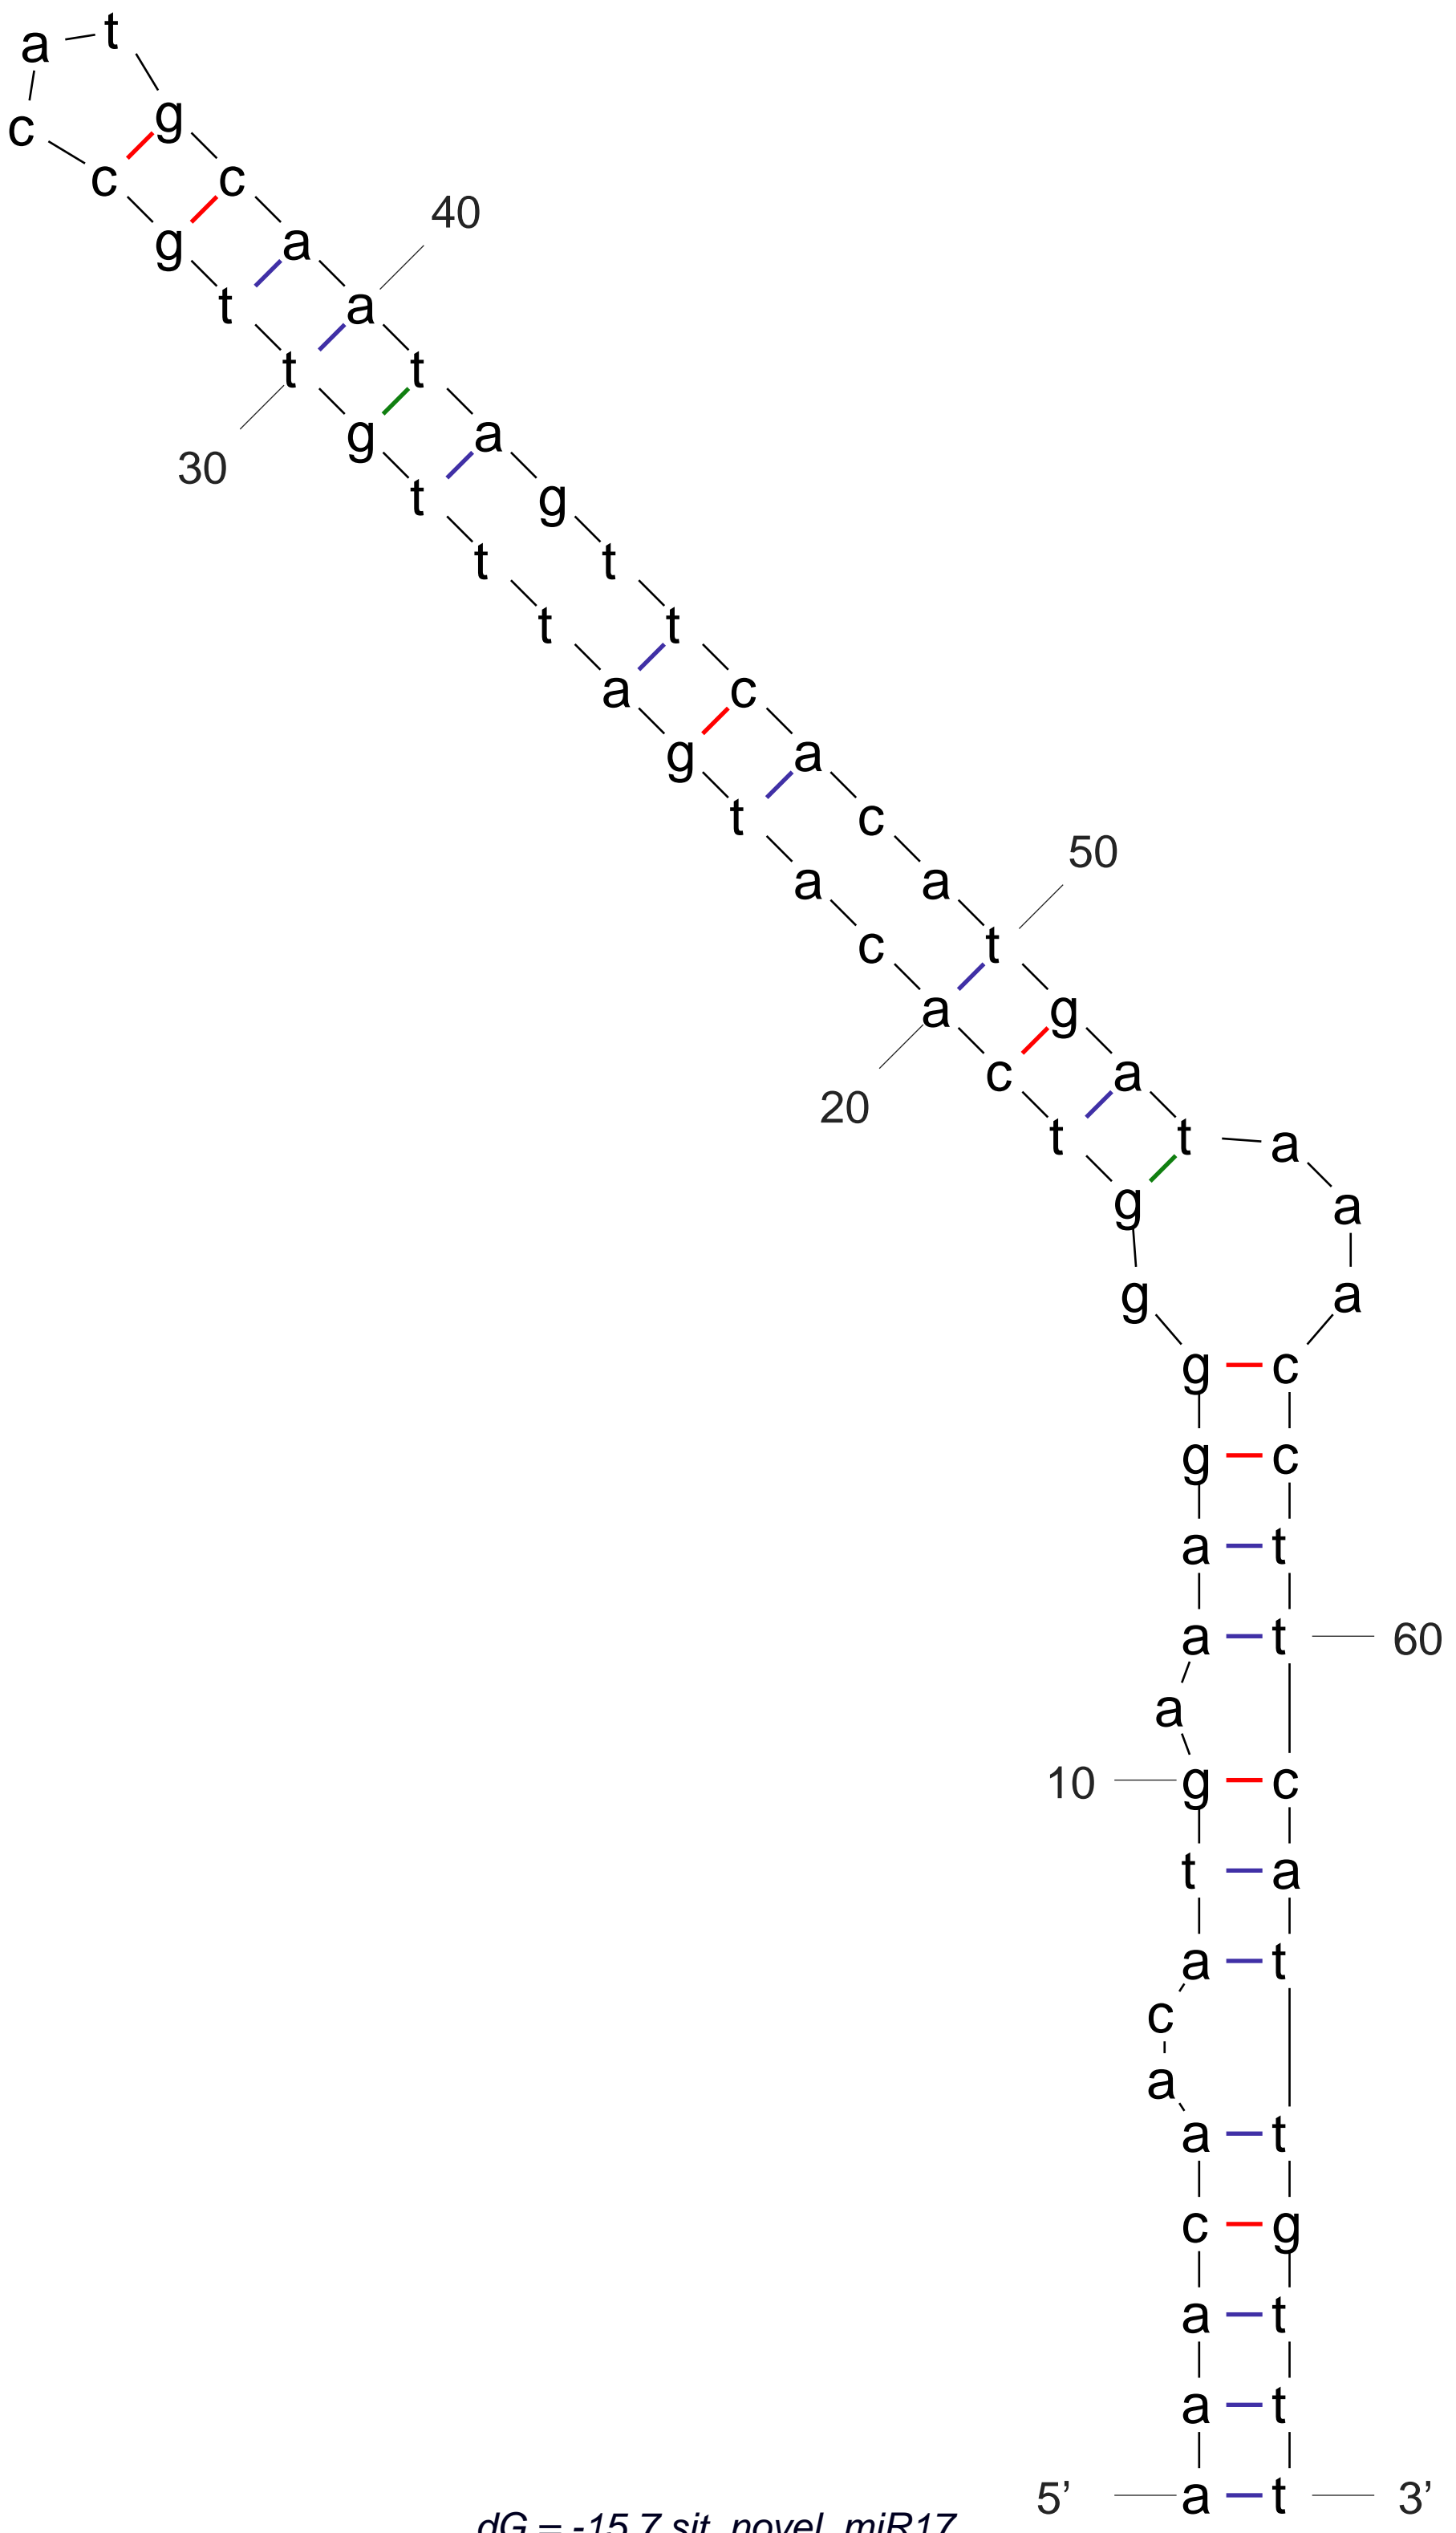

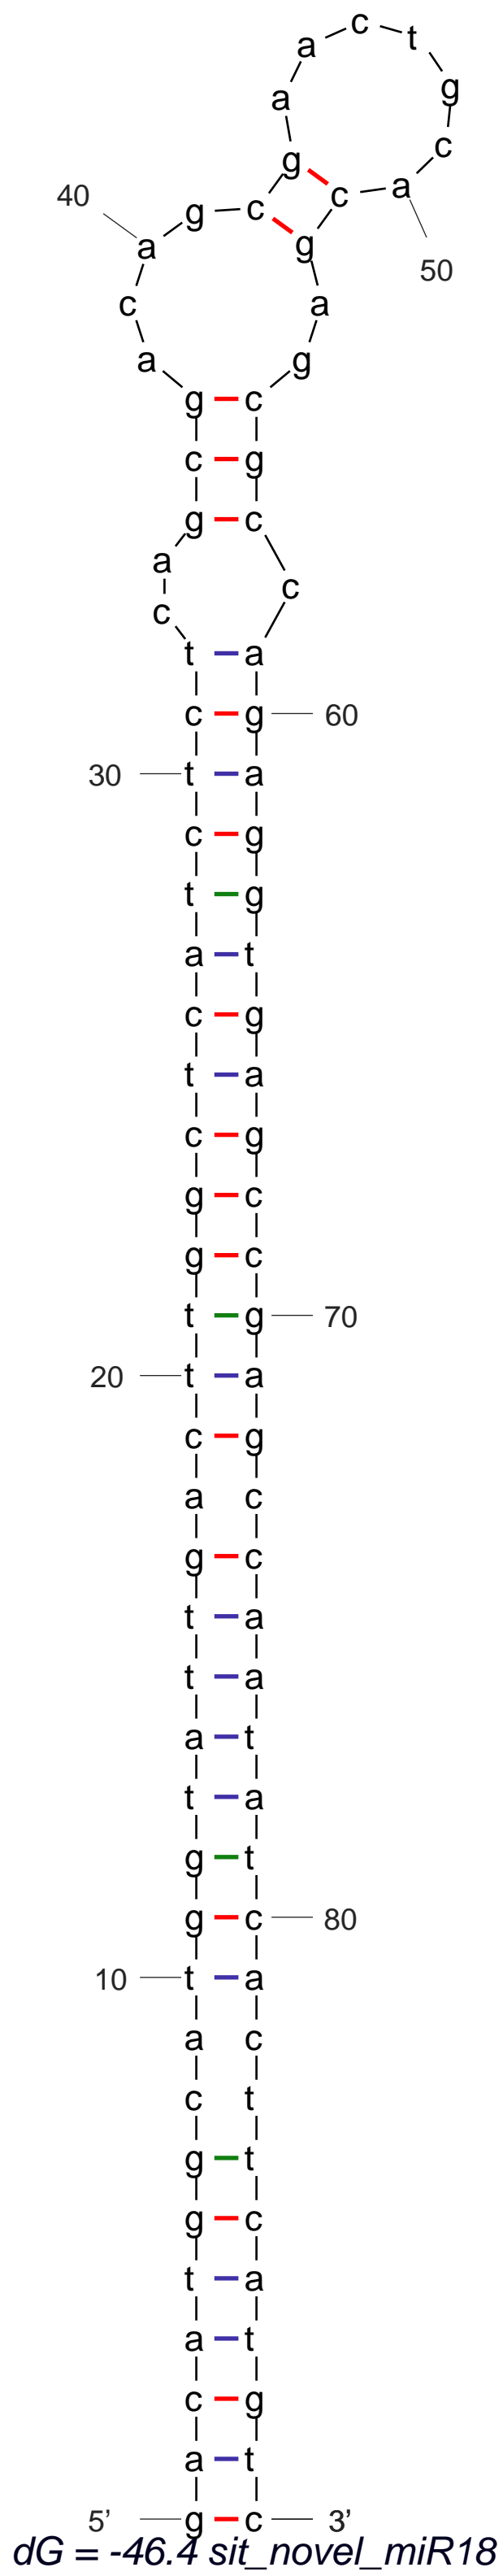

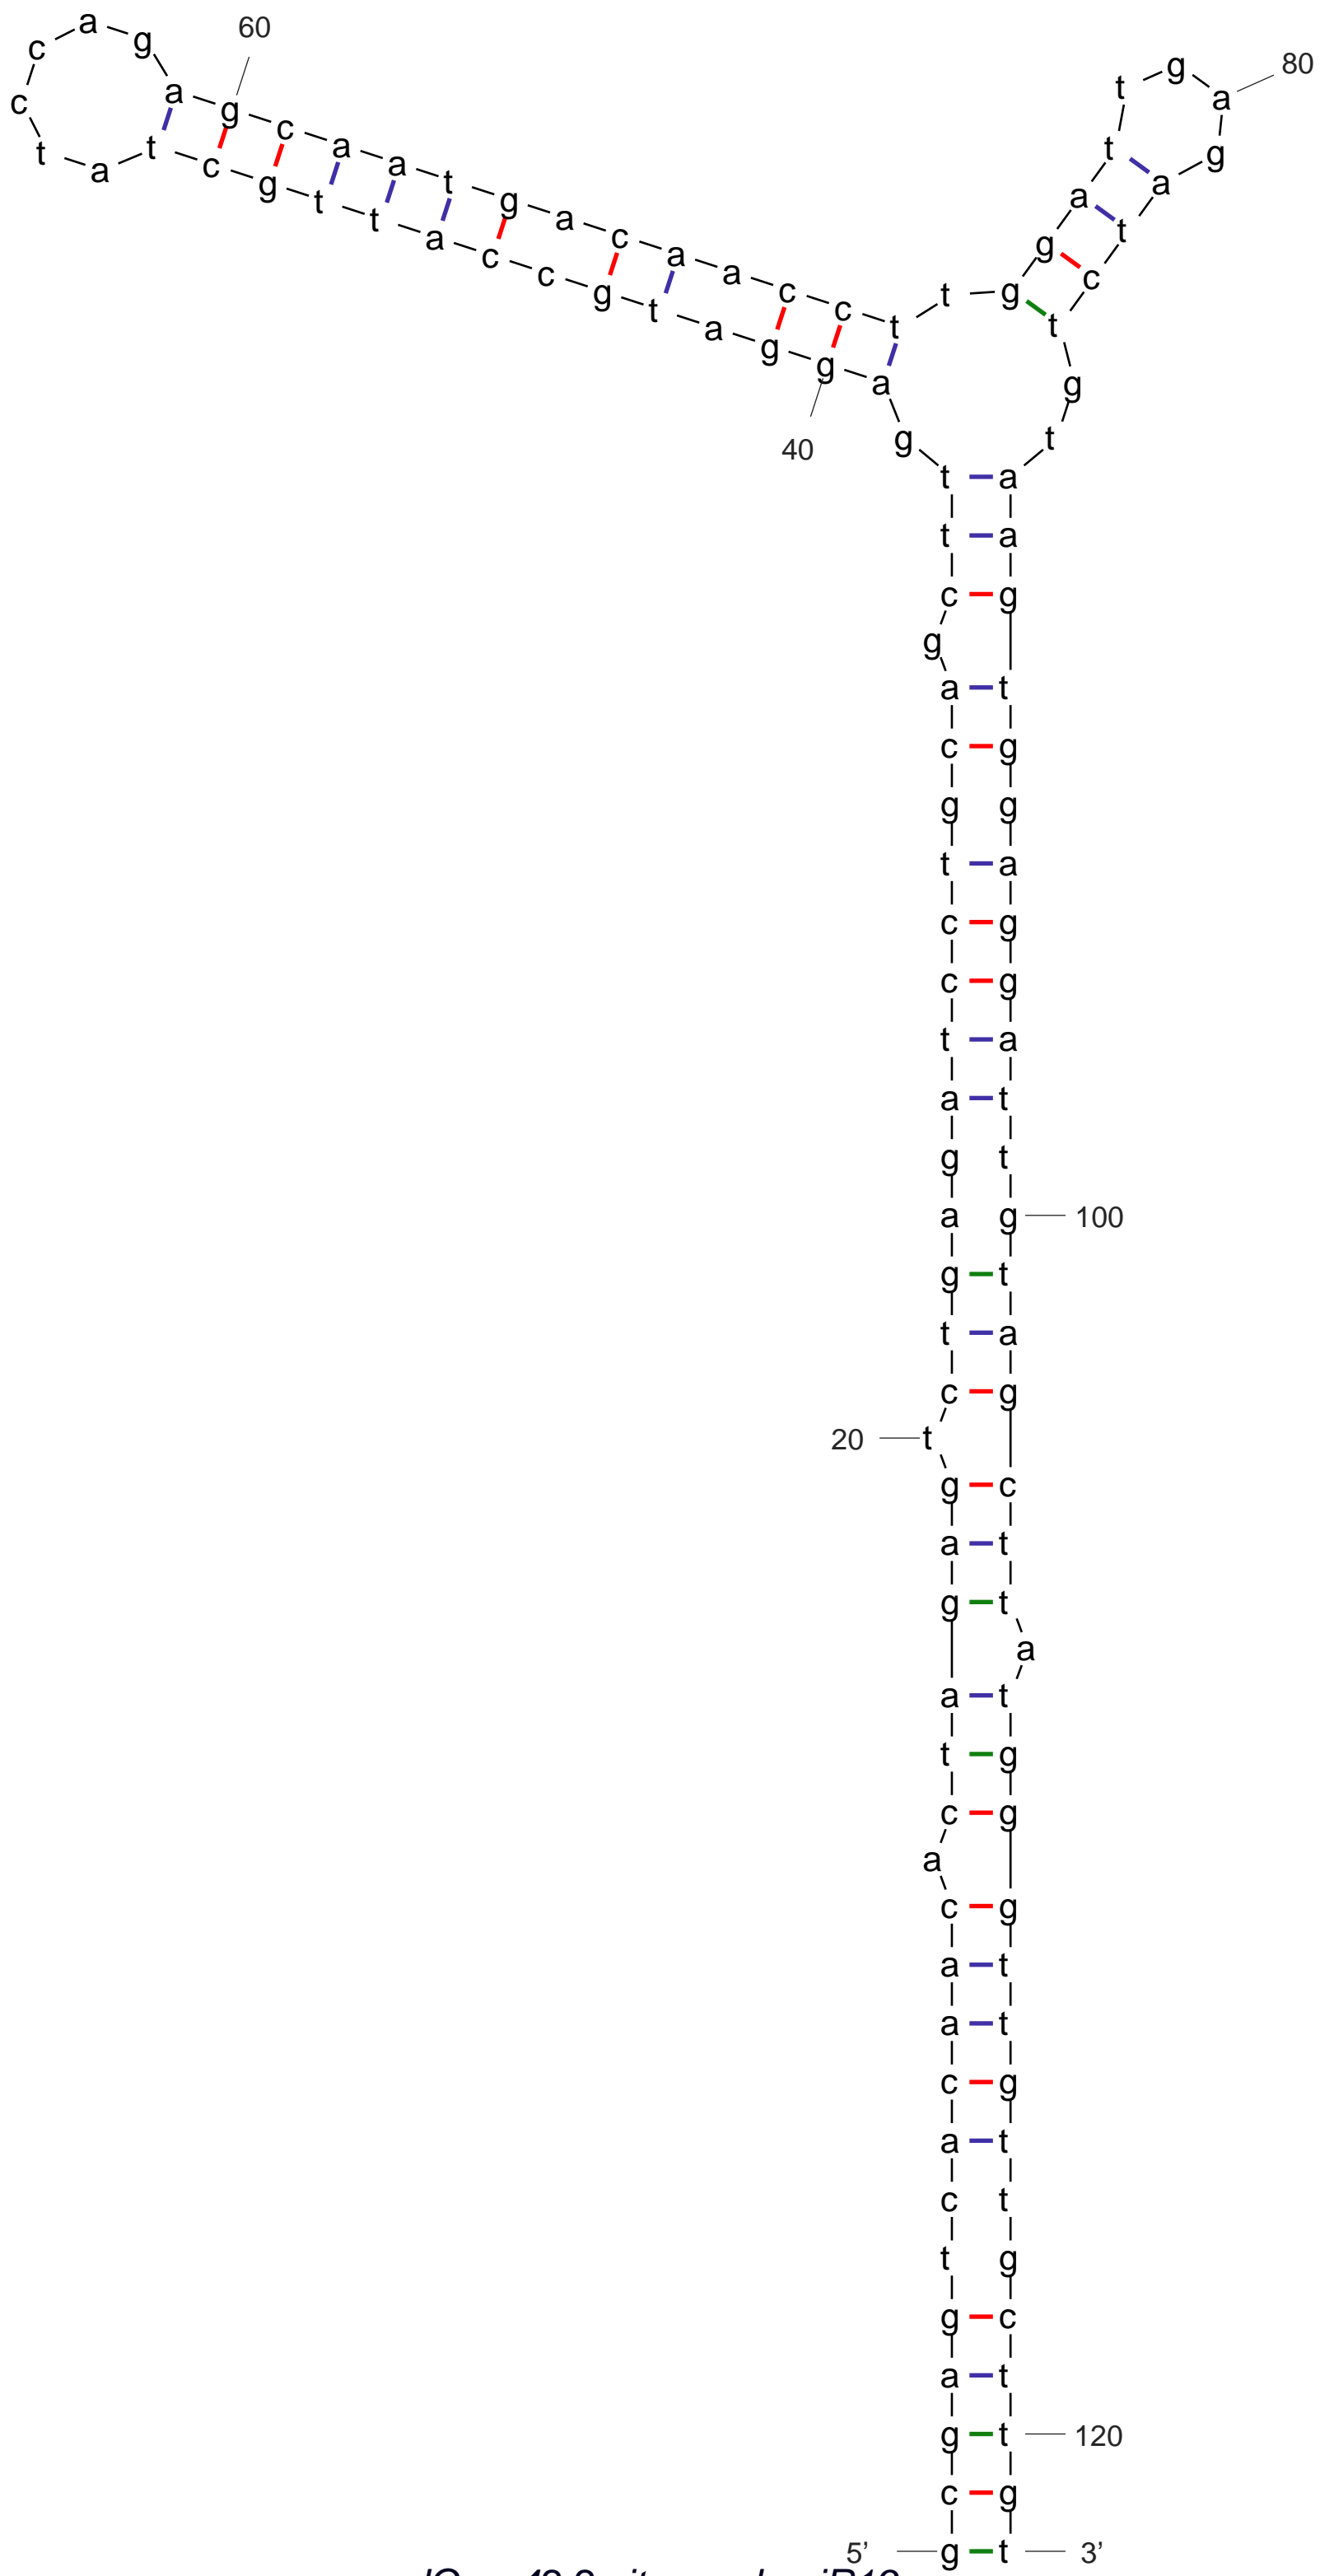

$dG = -42.2$  *sit\_novel\_miR19*

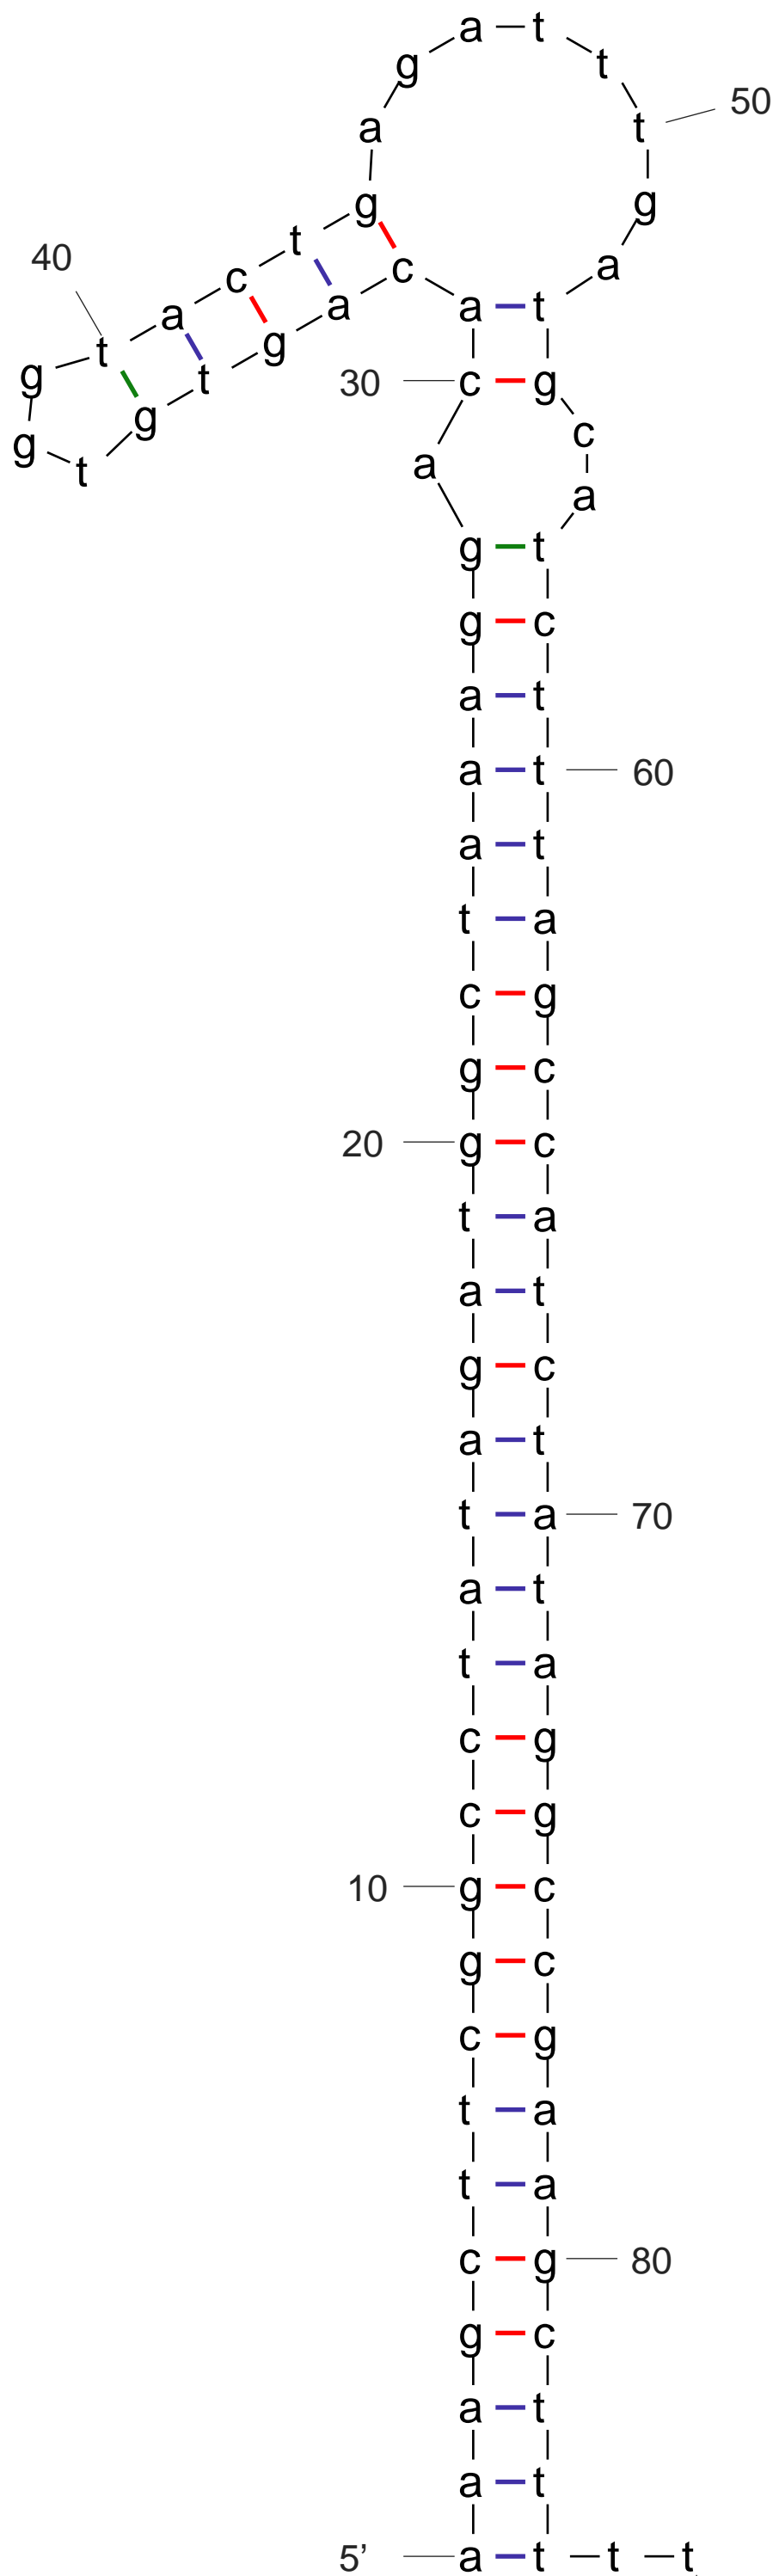

dG = -48.9 sit\_novel\_miR20

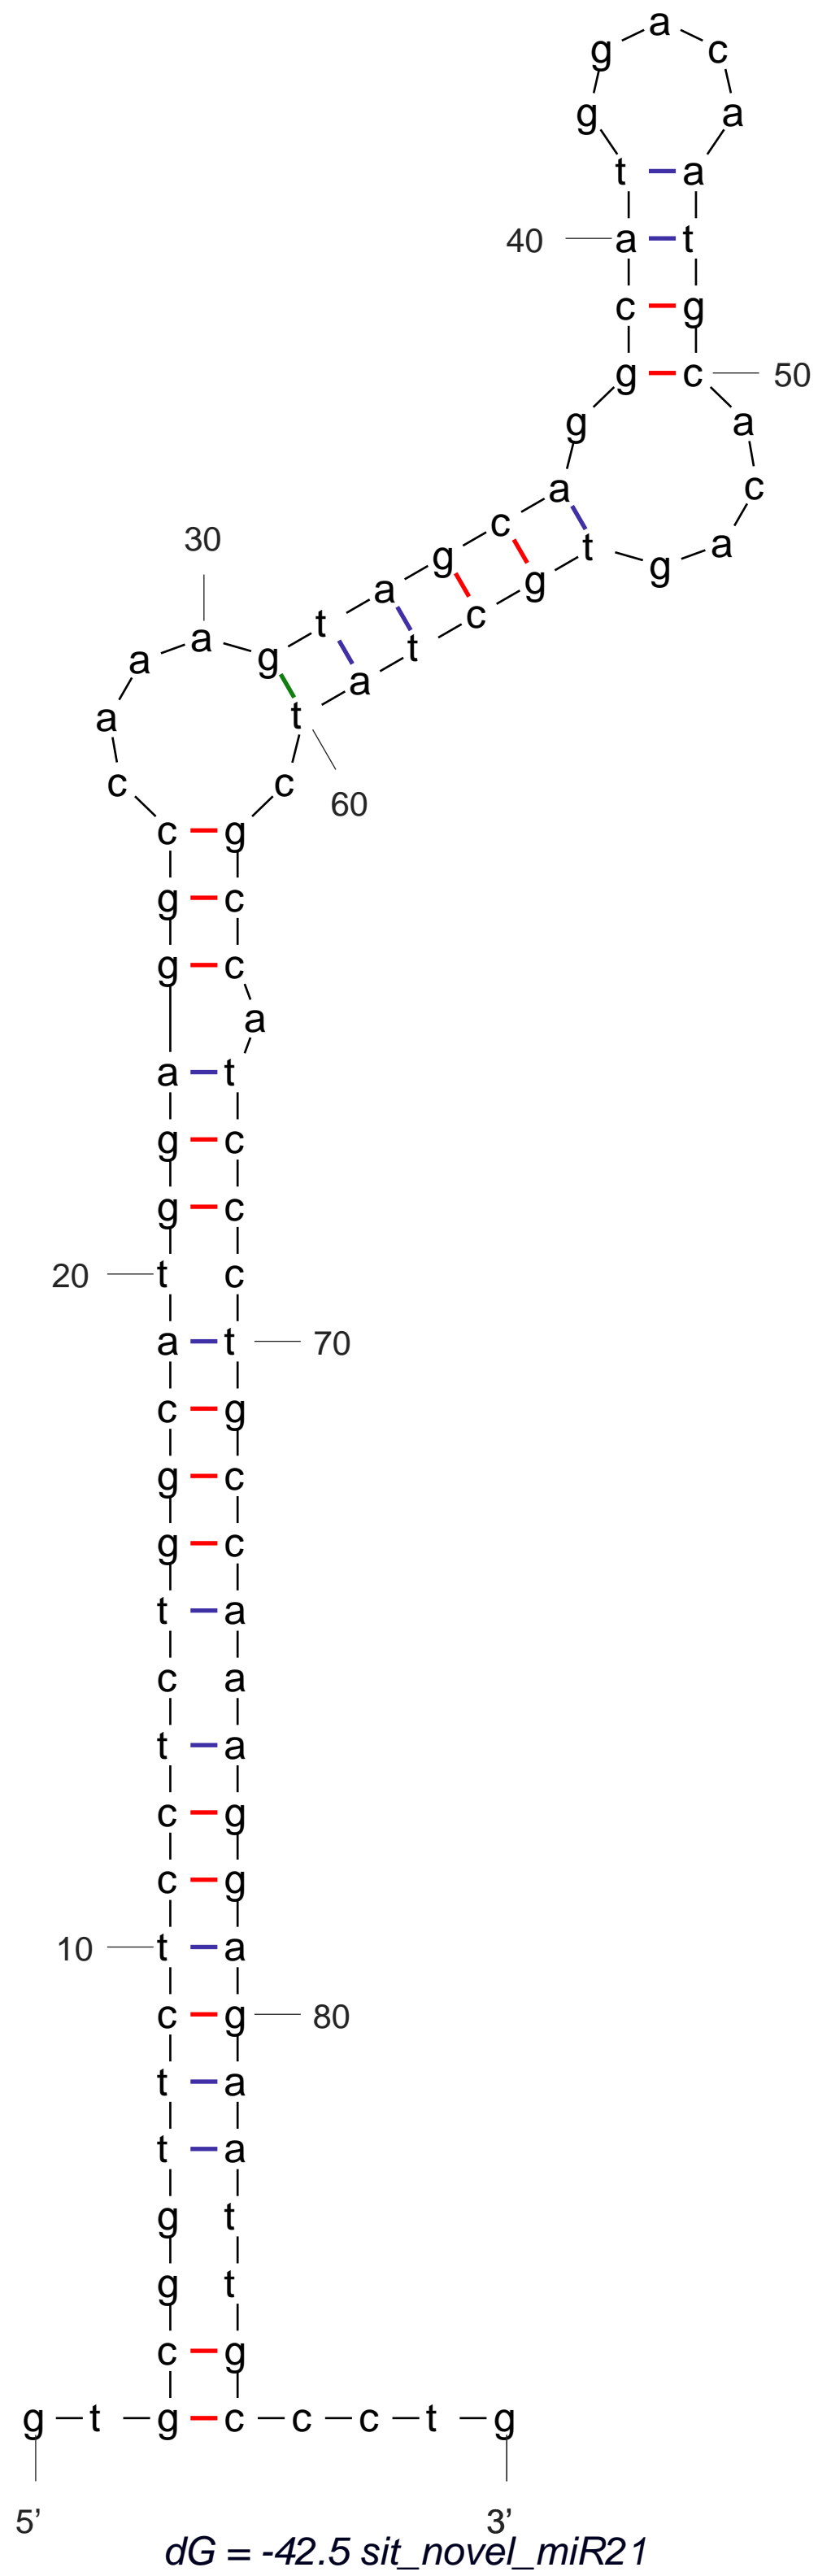

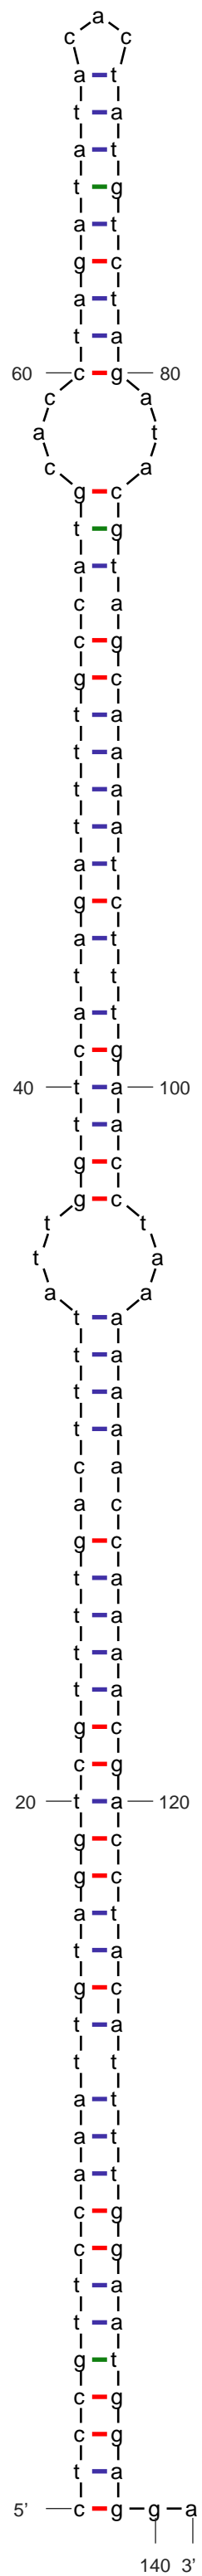

$dG = -74.6$  *sit\_novel\_miR22*

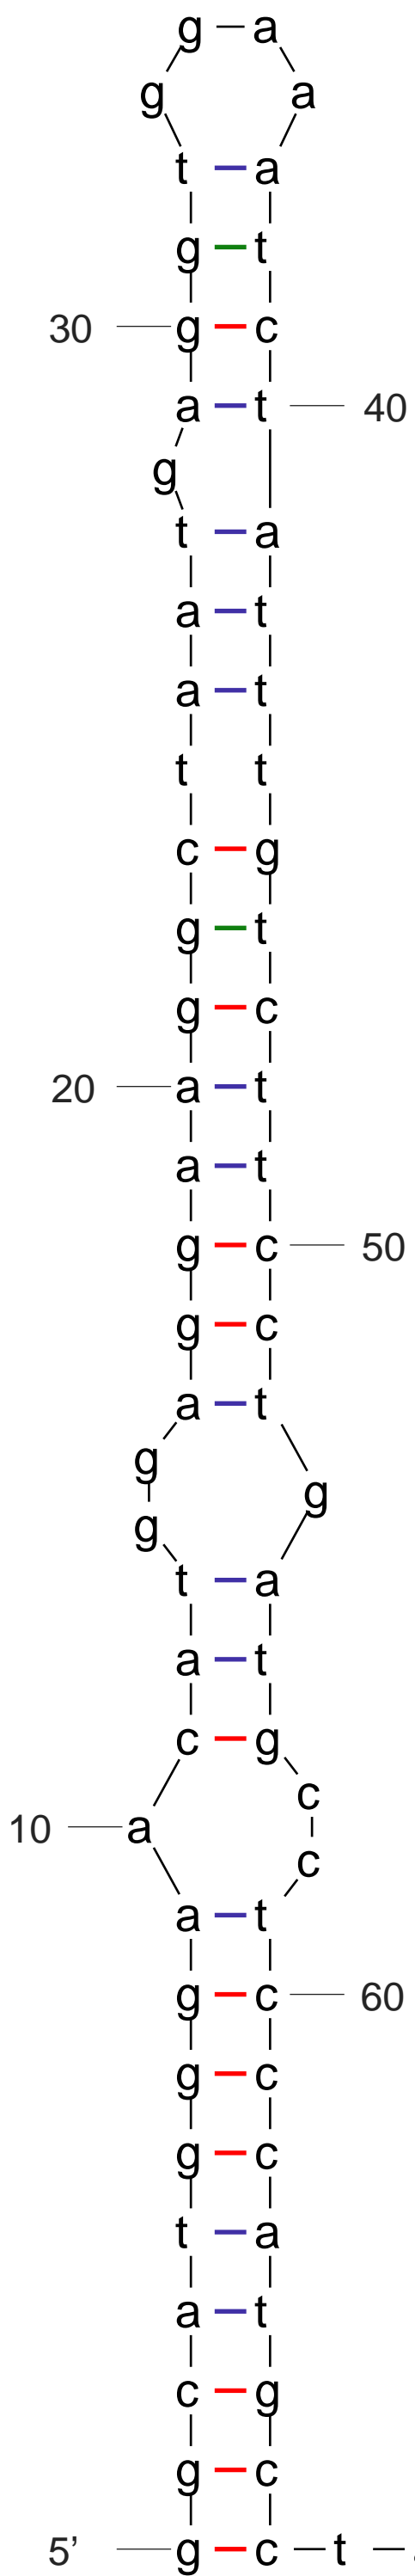

dG = -34.7 sit\_novel\_miR23

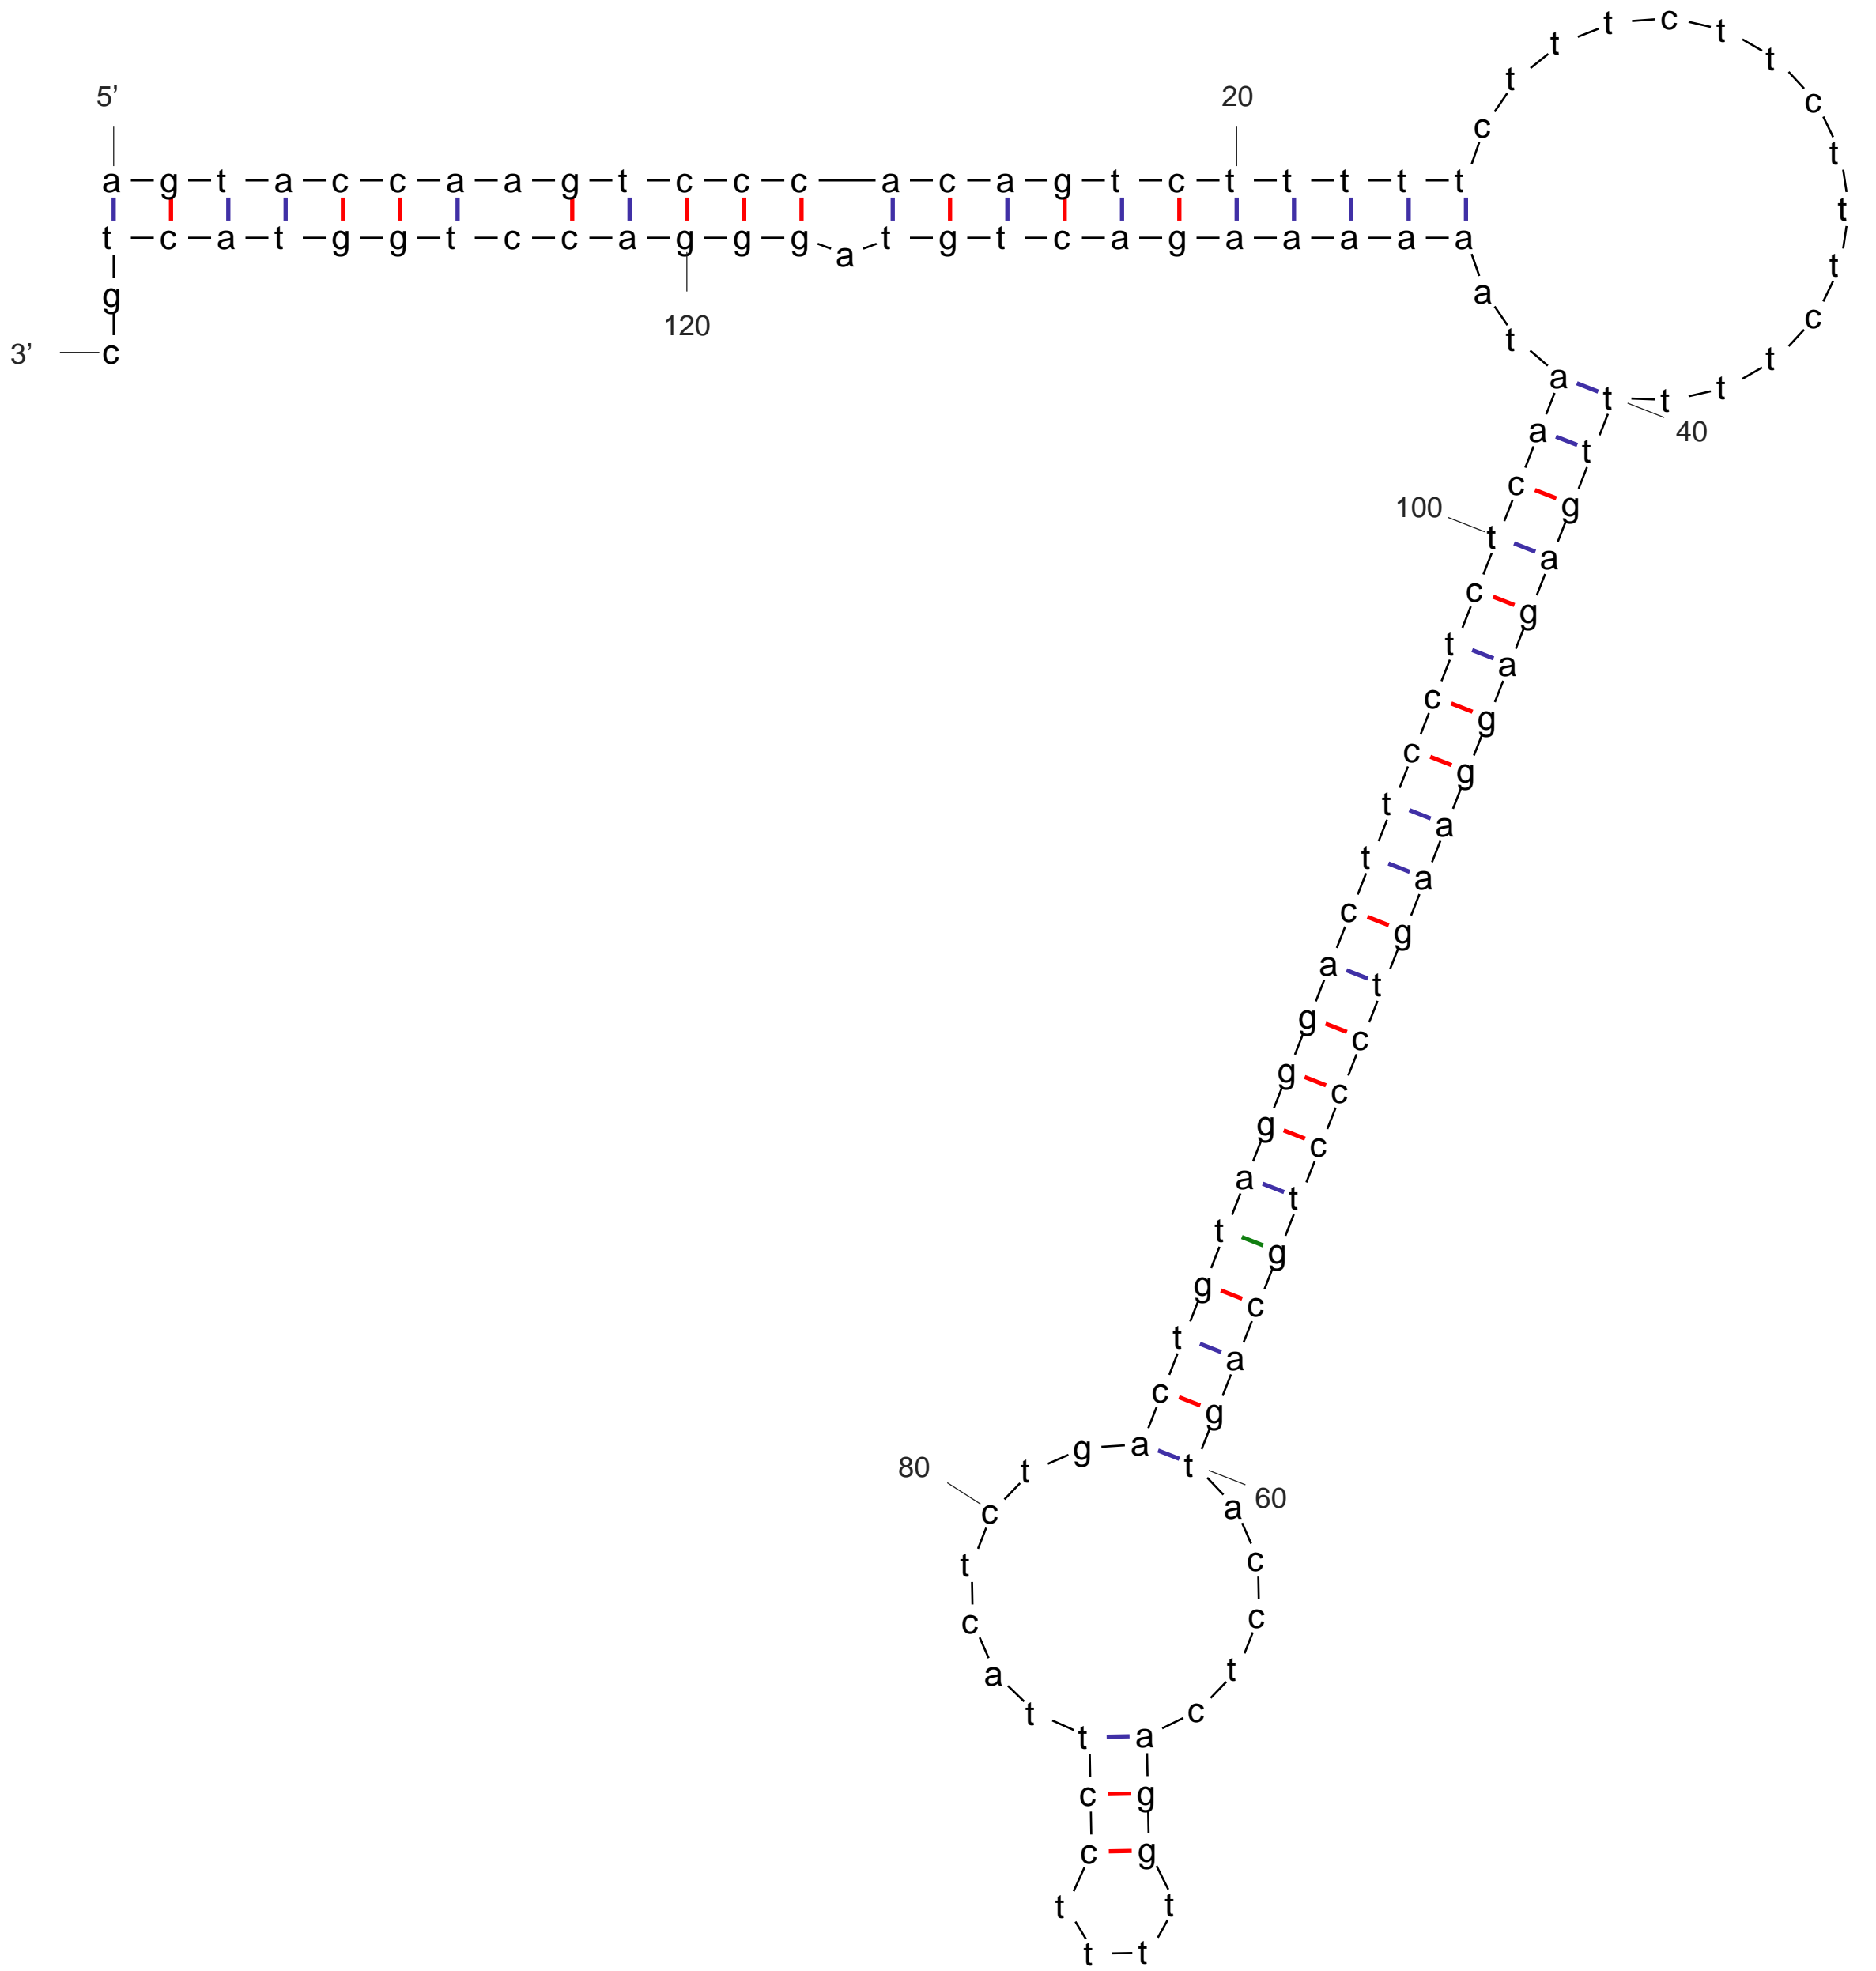



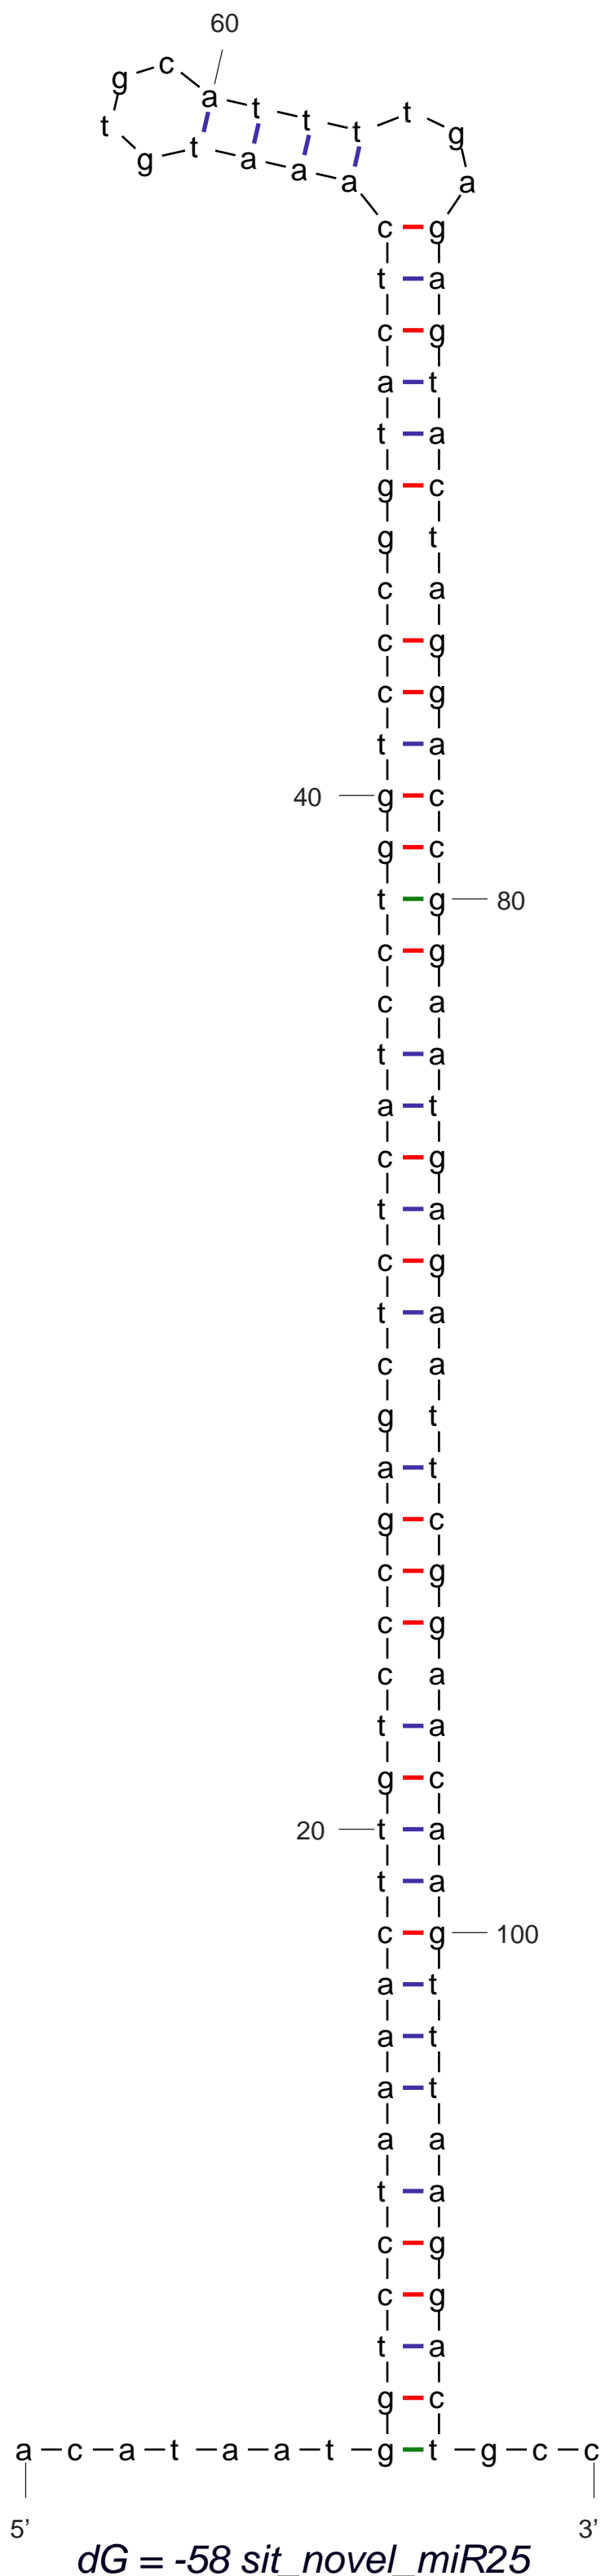



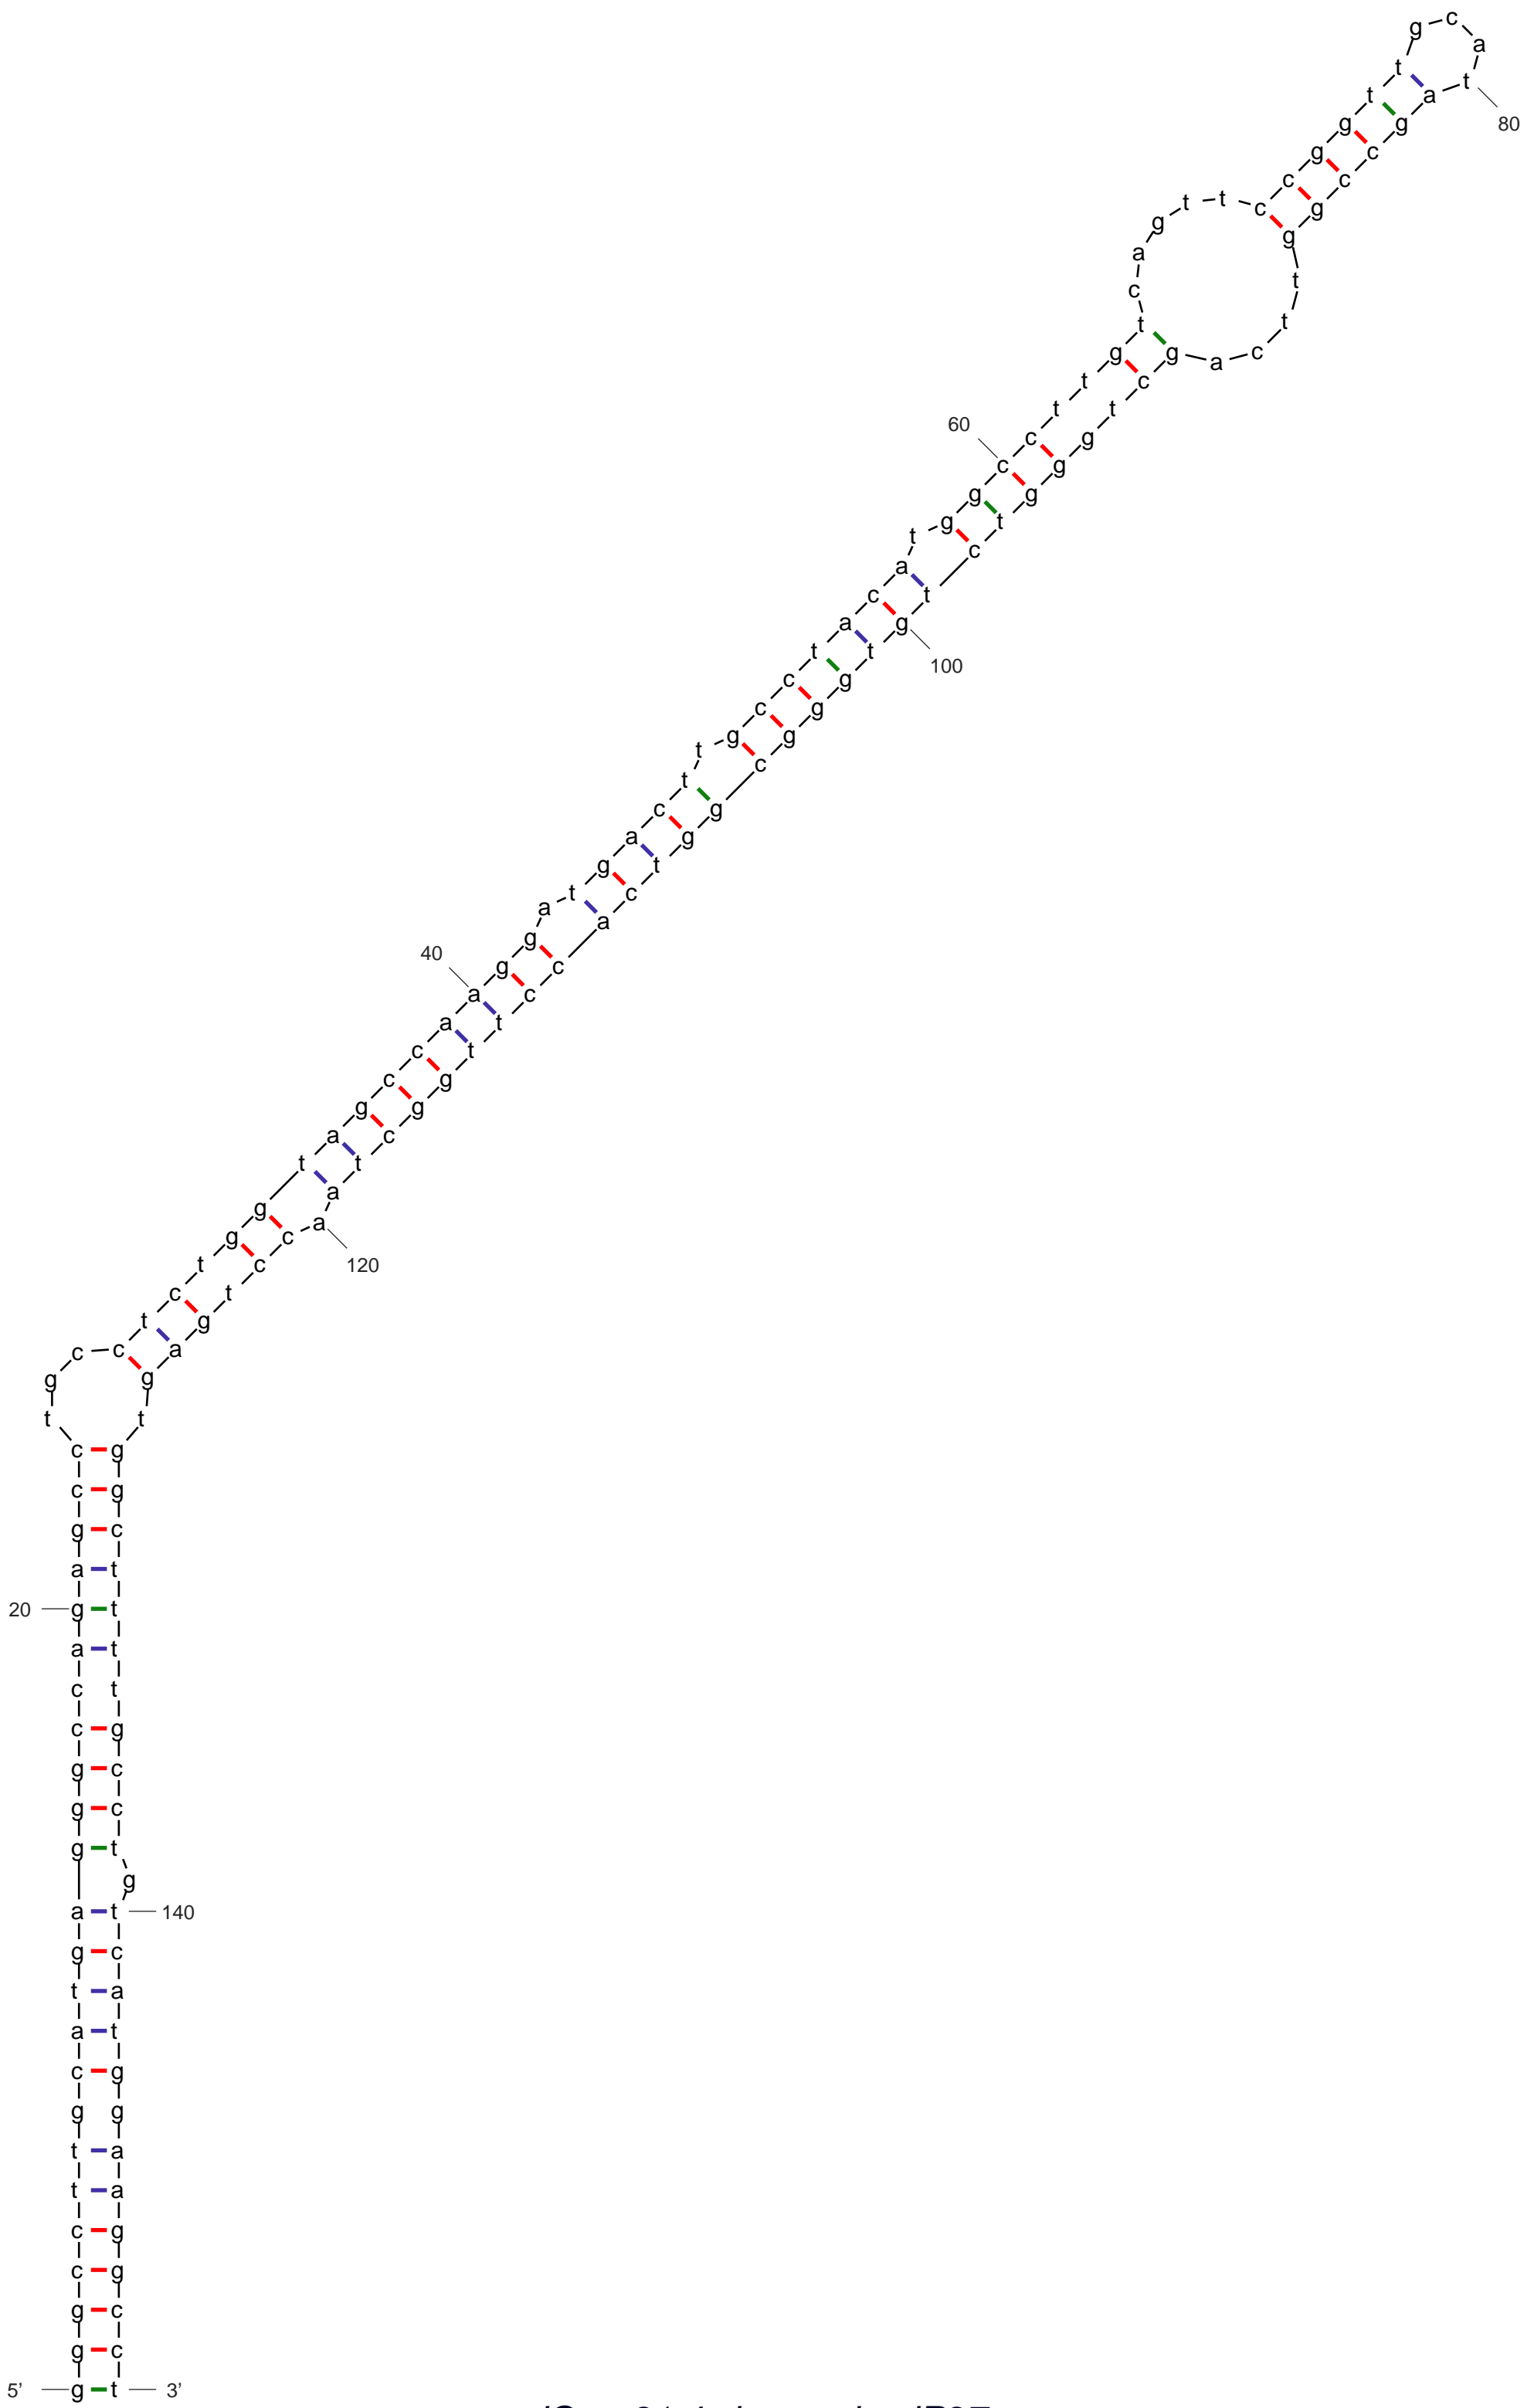

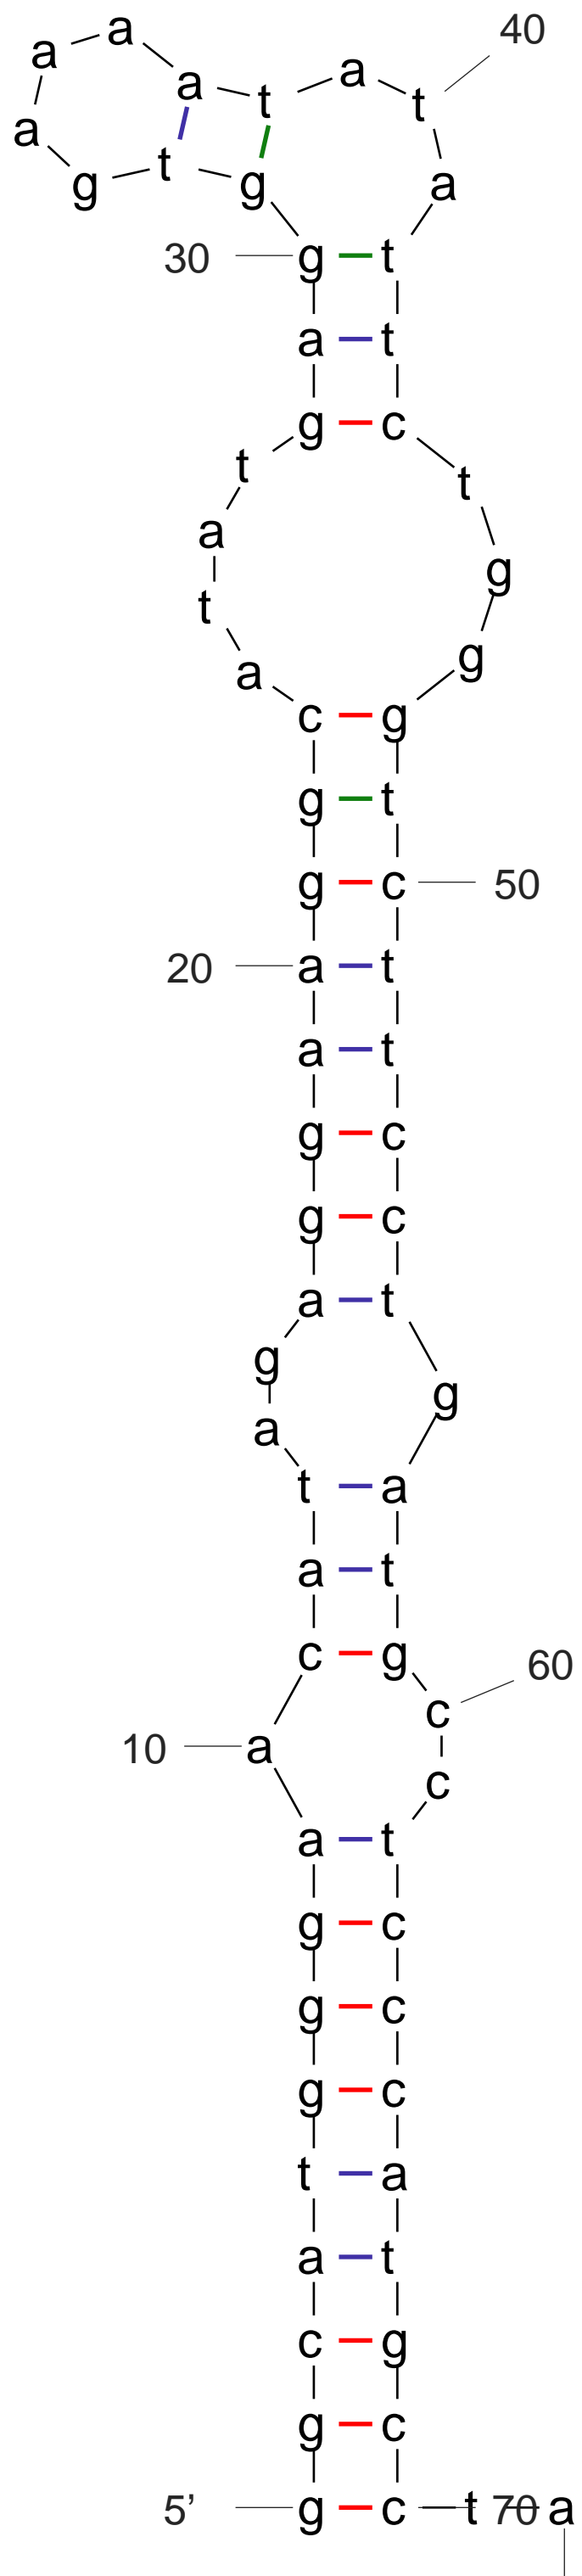

dG = -32 *sit\_novel\_miR28*

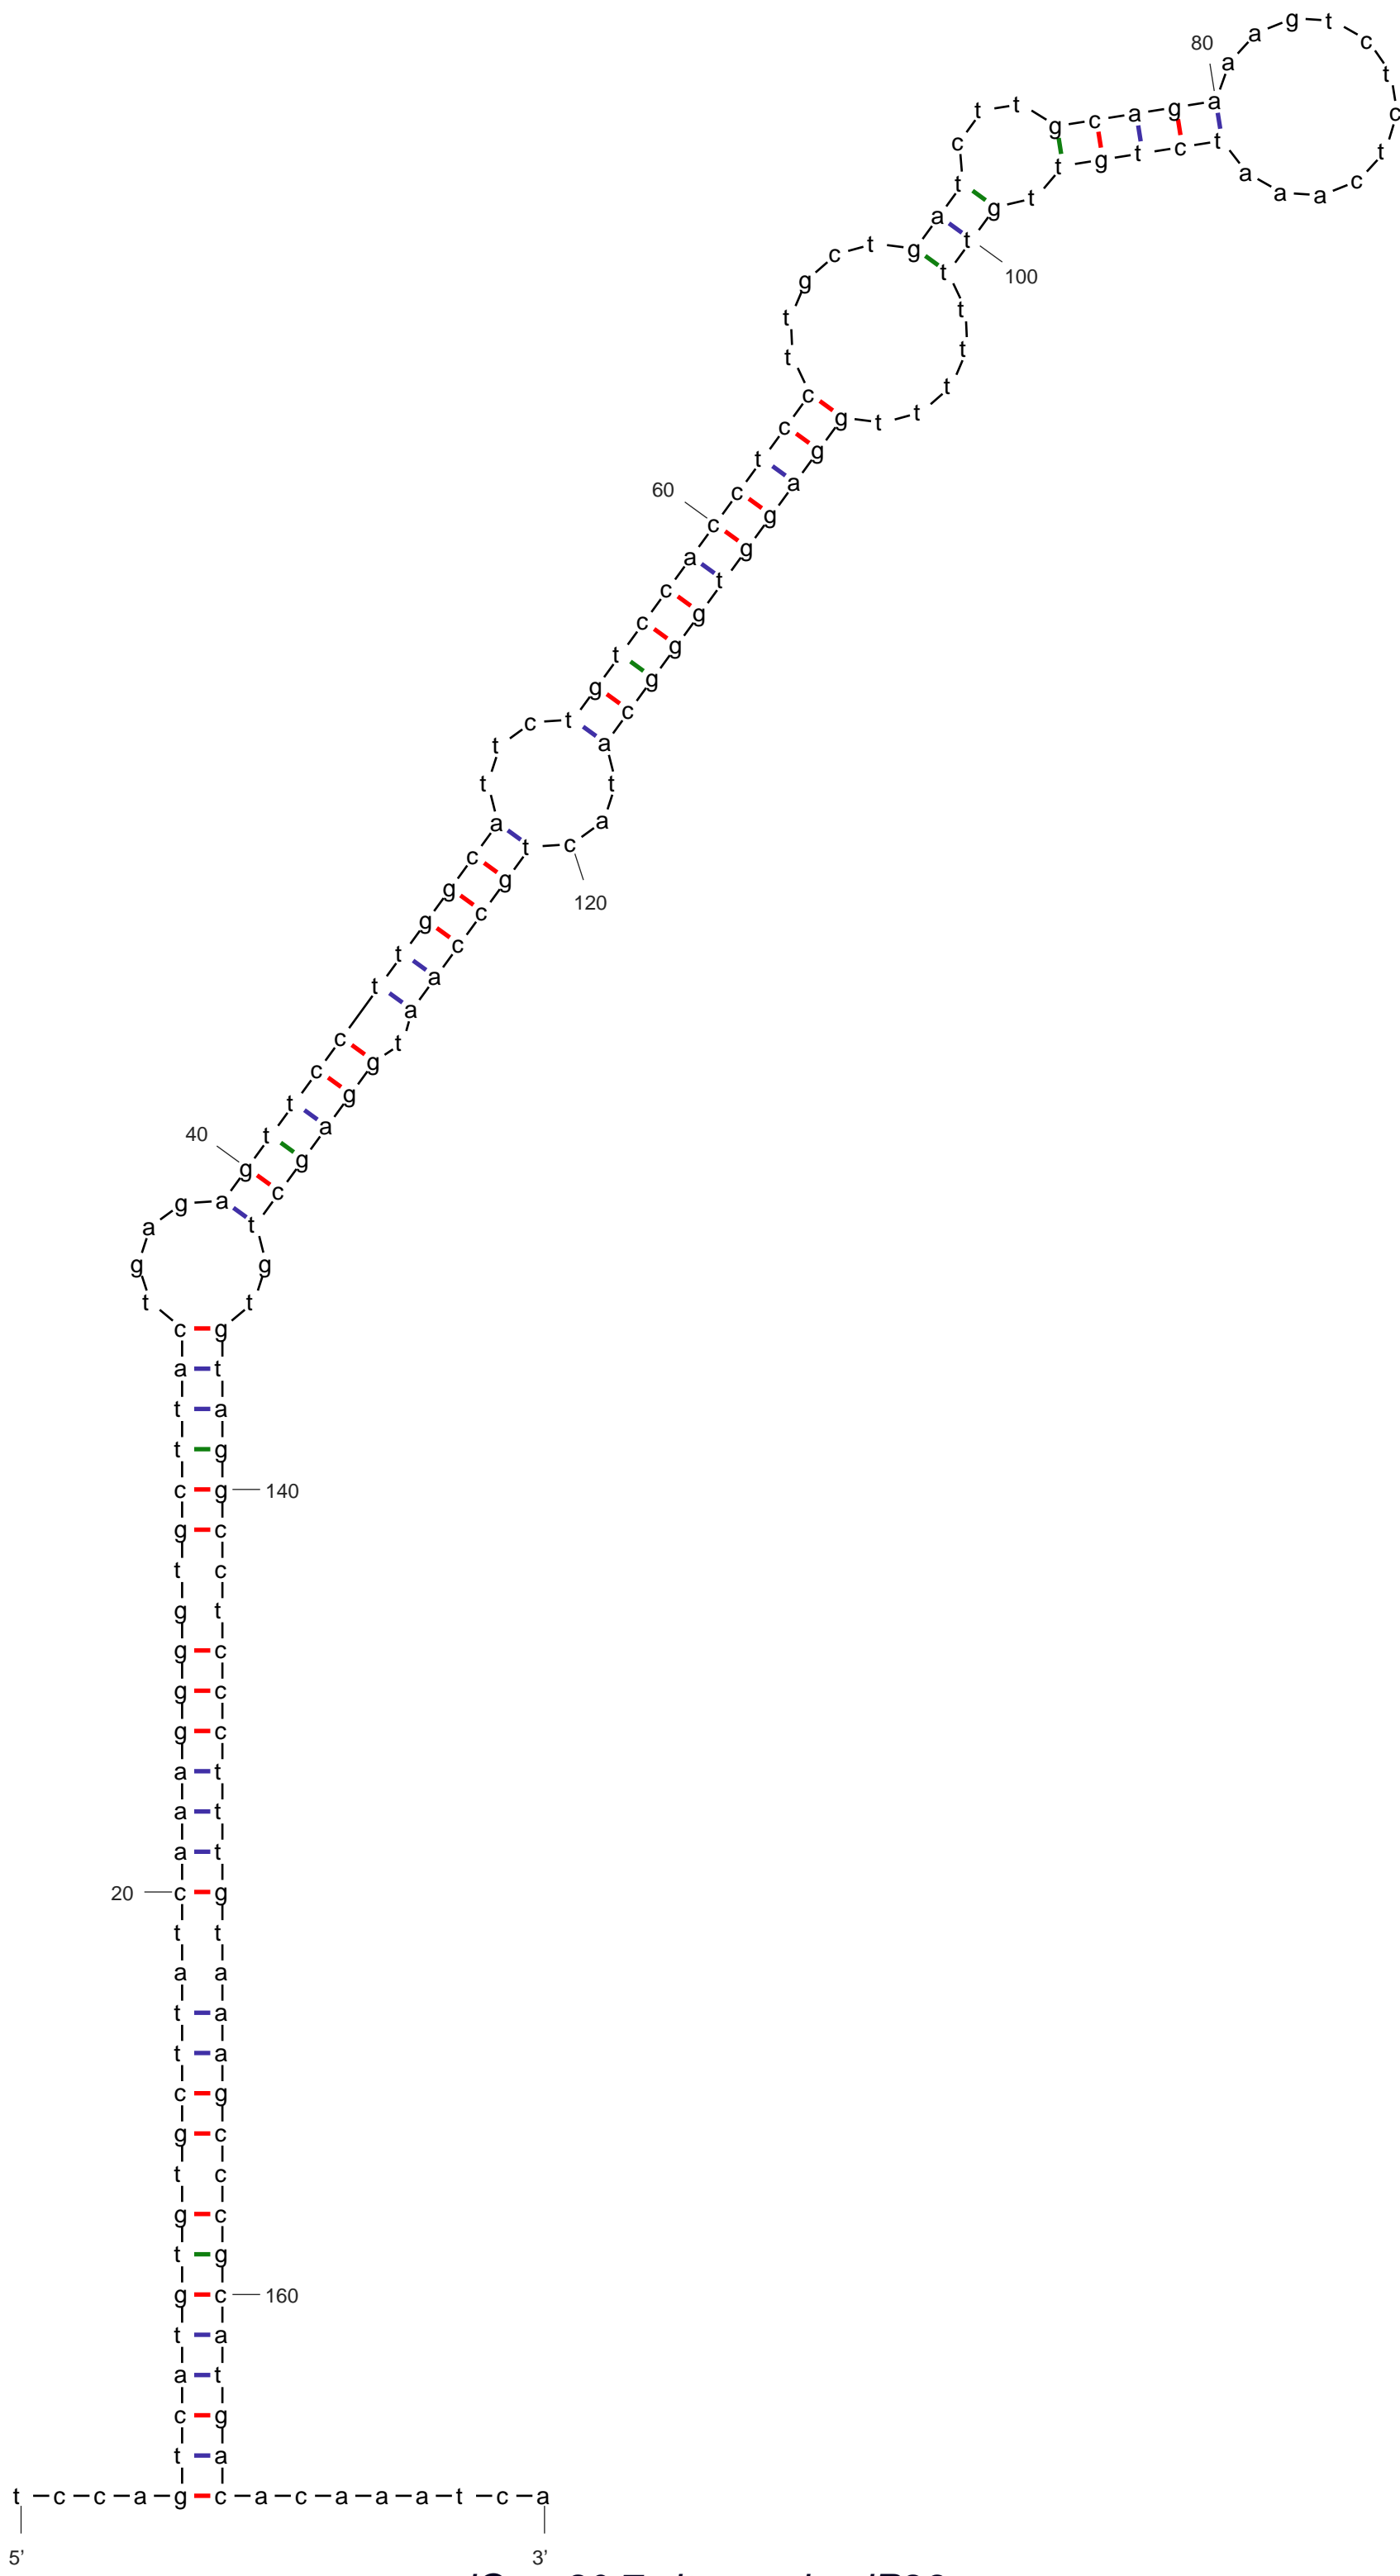

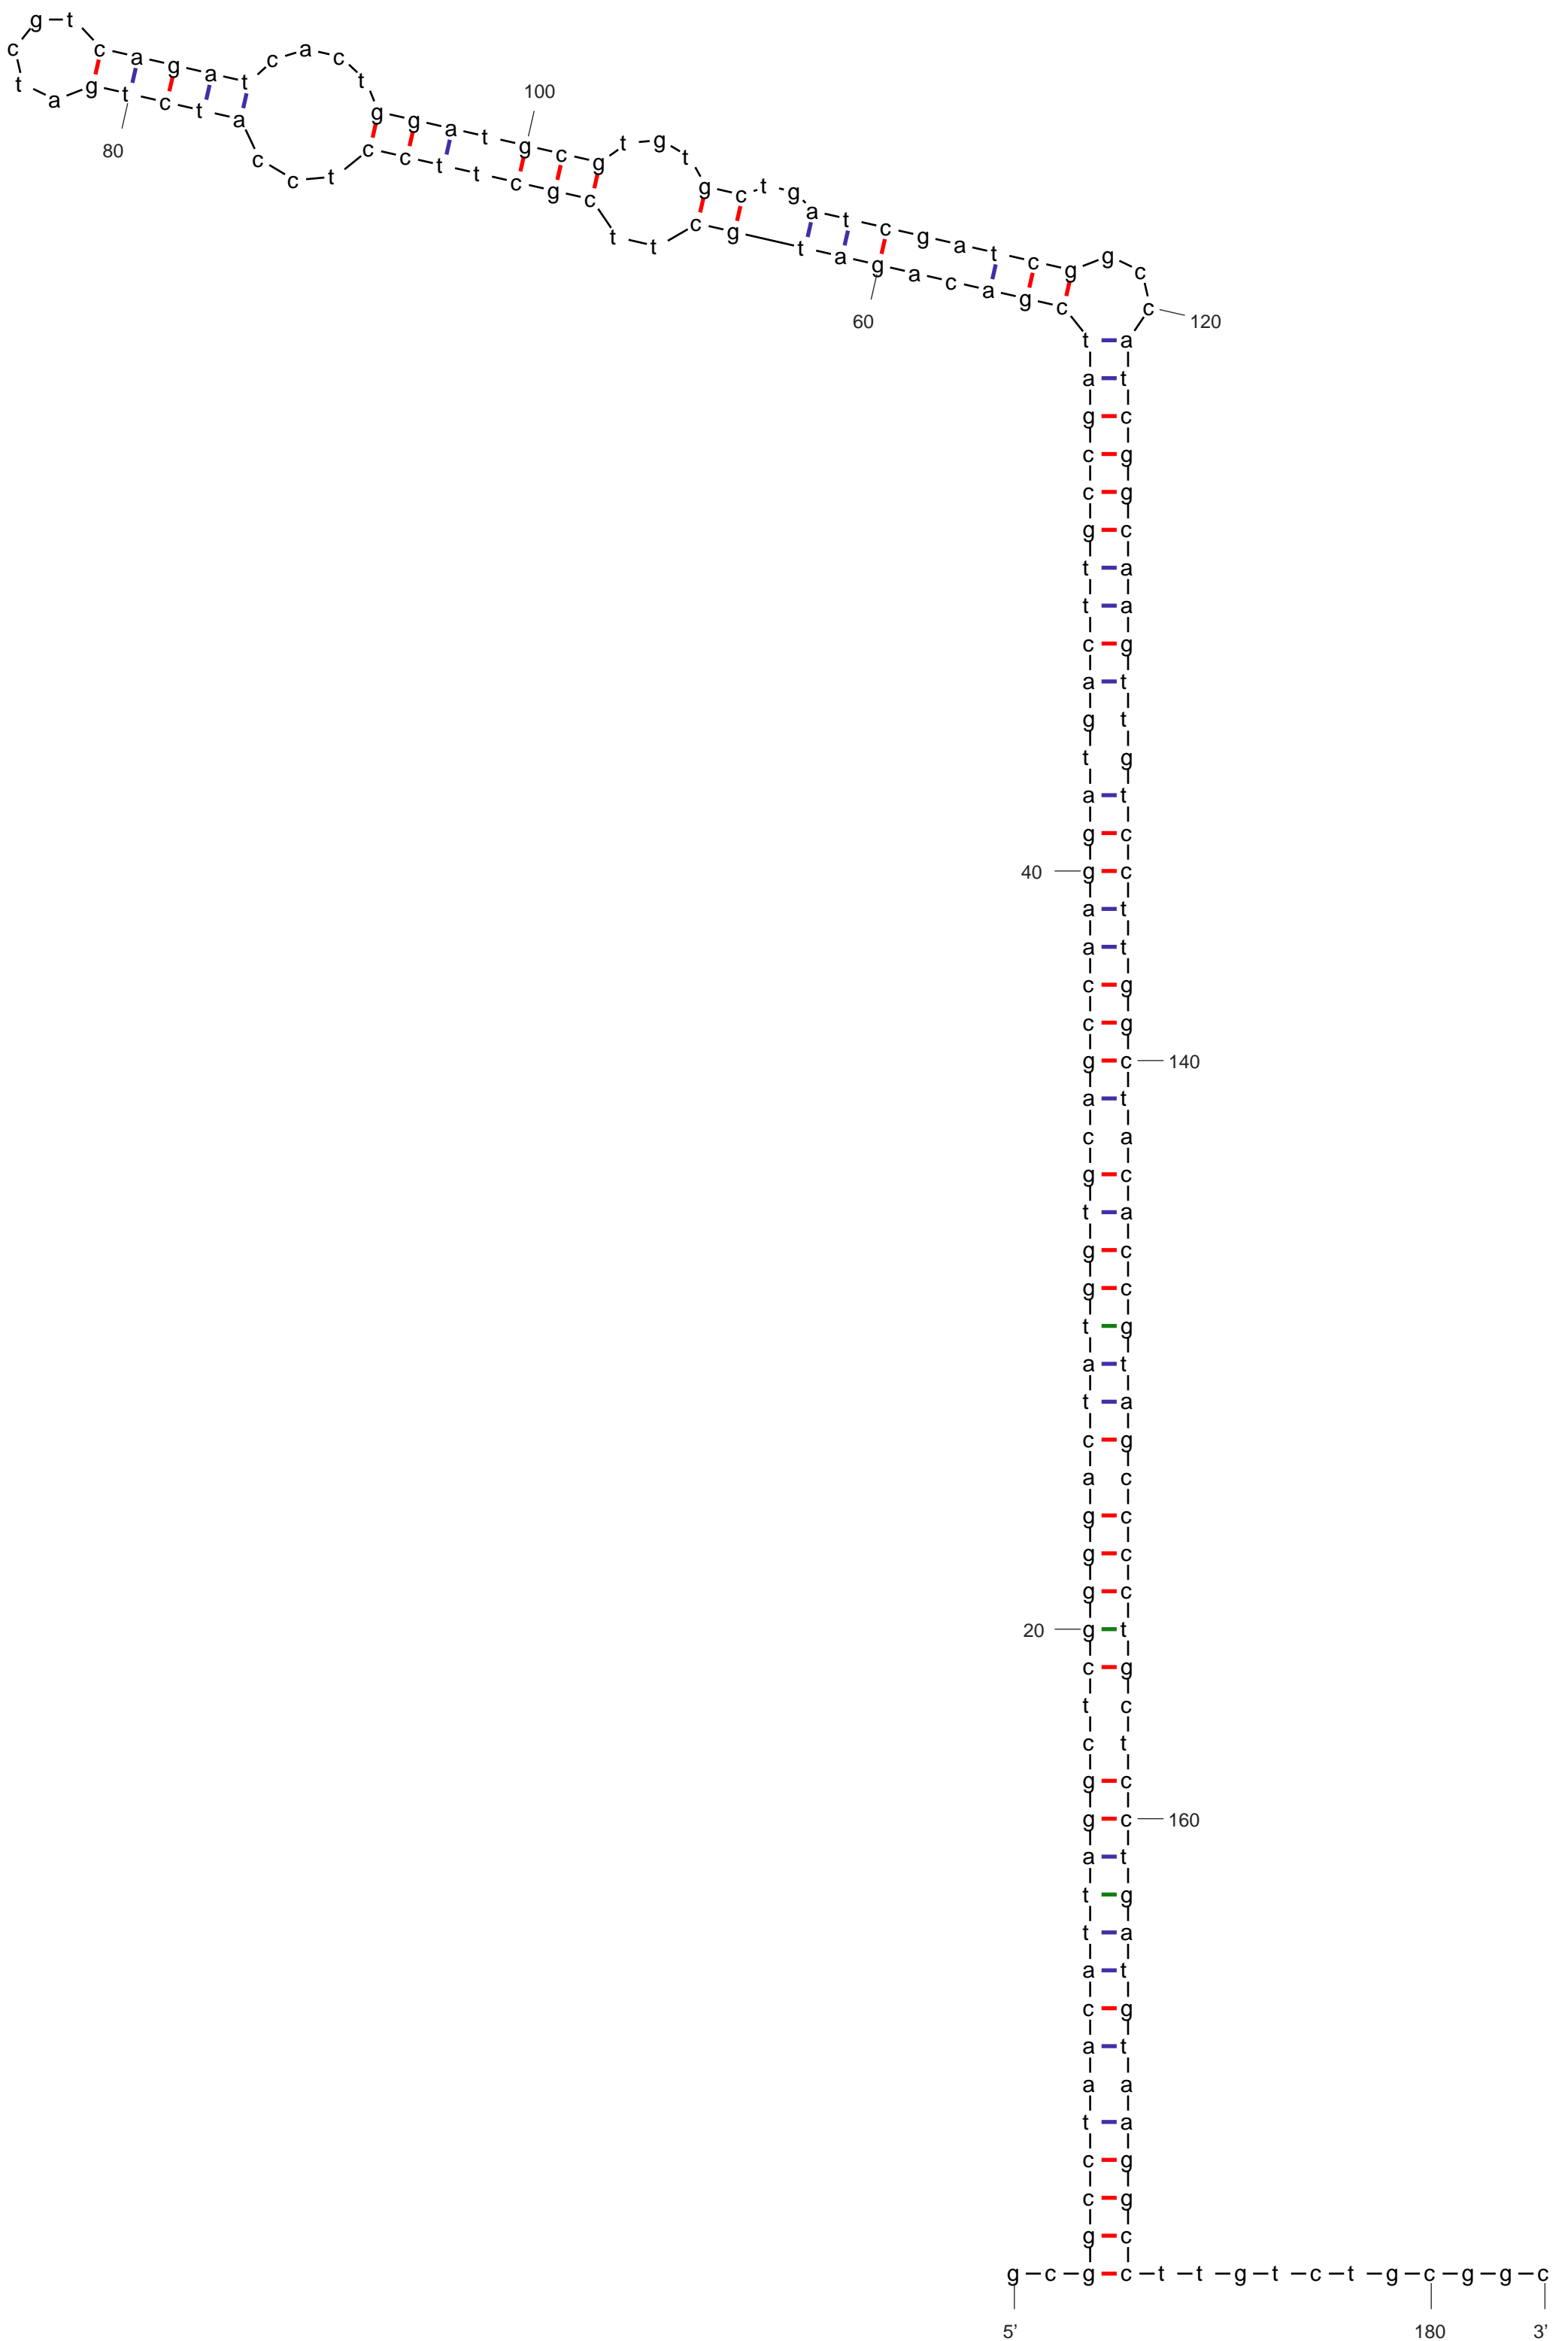

*dG = -103.1 sit\_novel\_miR30*

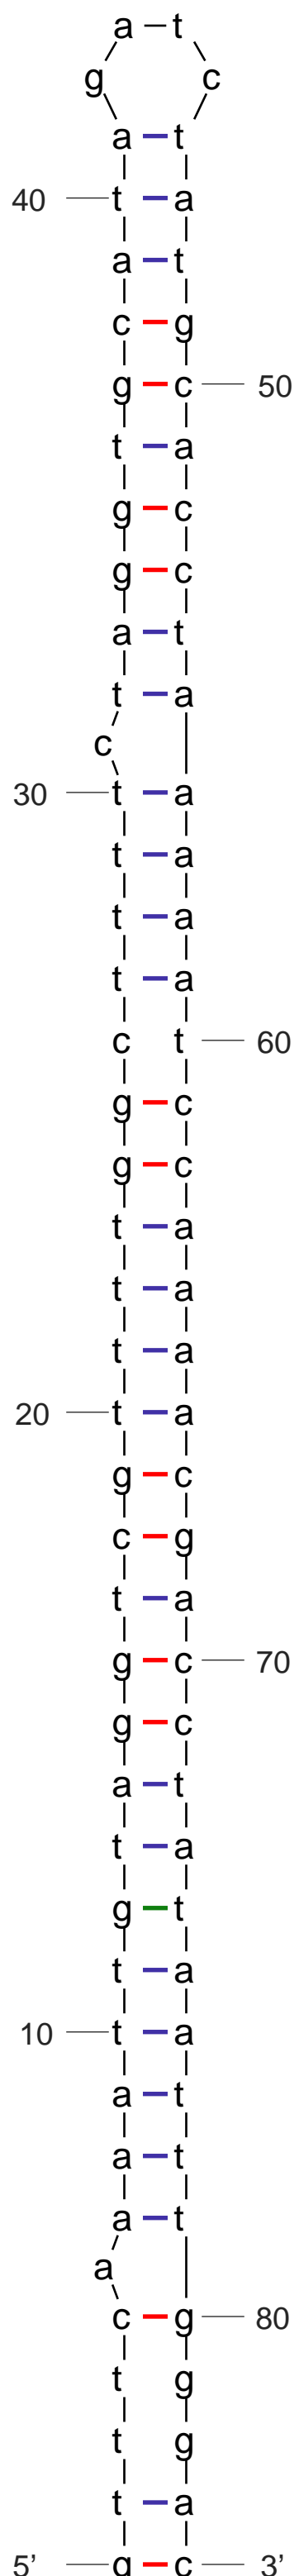

dG = -47.4 sit\_novel\_miR31

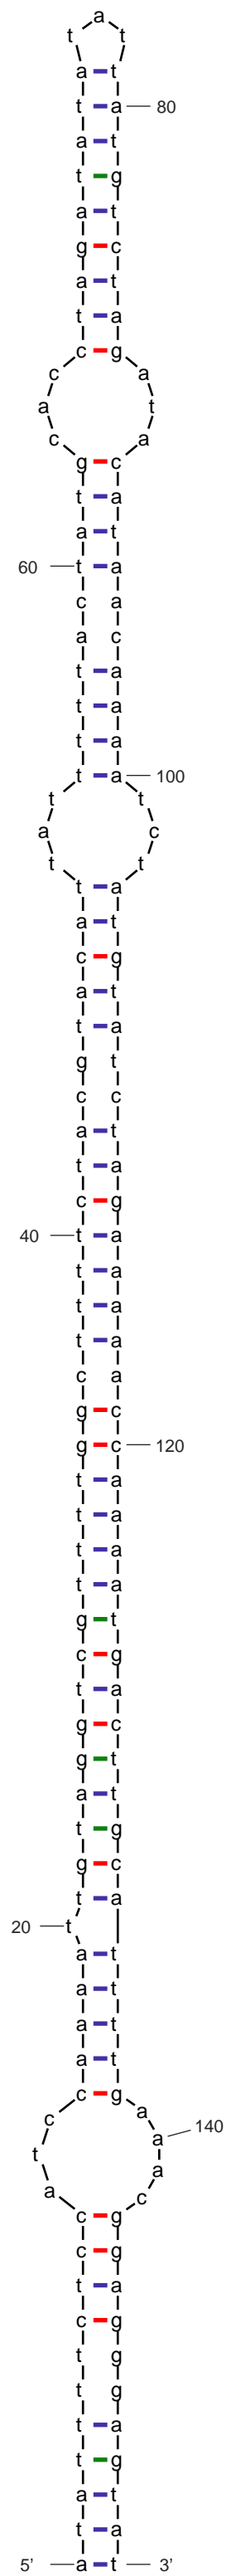

$dG = -58.6$  *sit\_novel\_miR32*



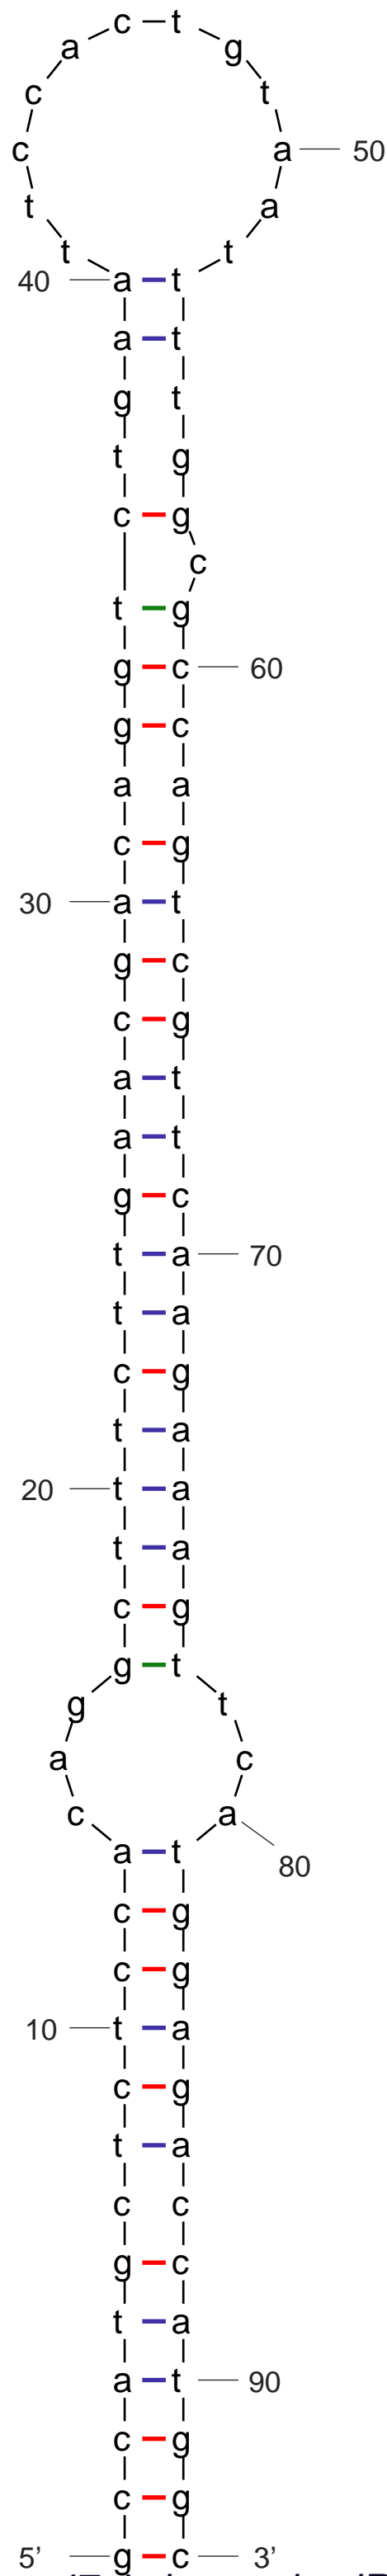

$dG = -47.4$  *sit\_novel\_miR33*



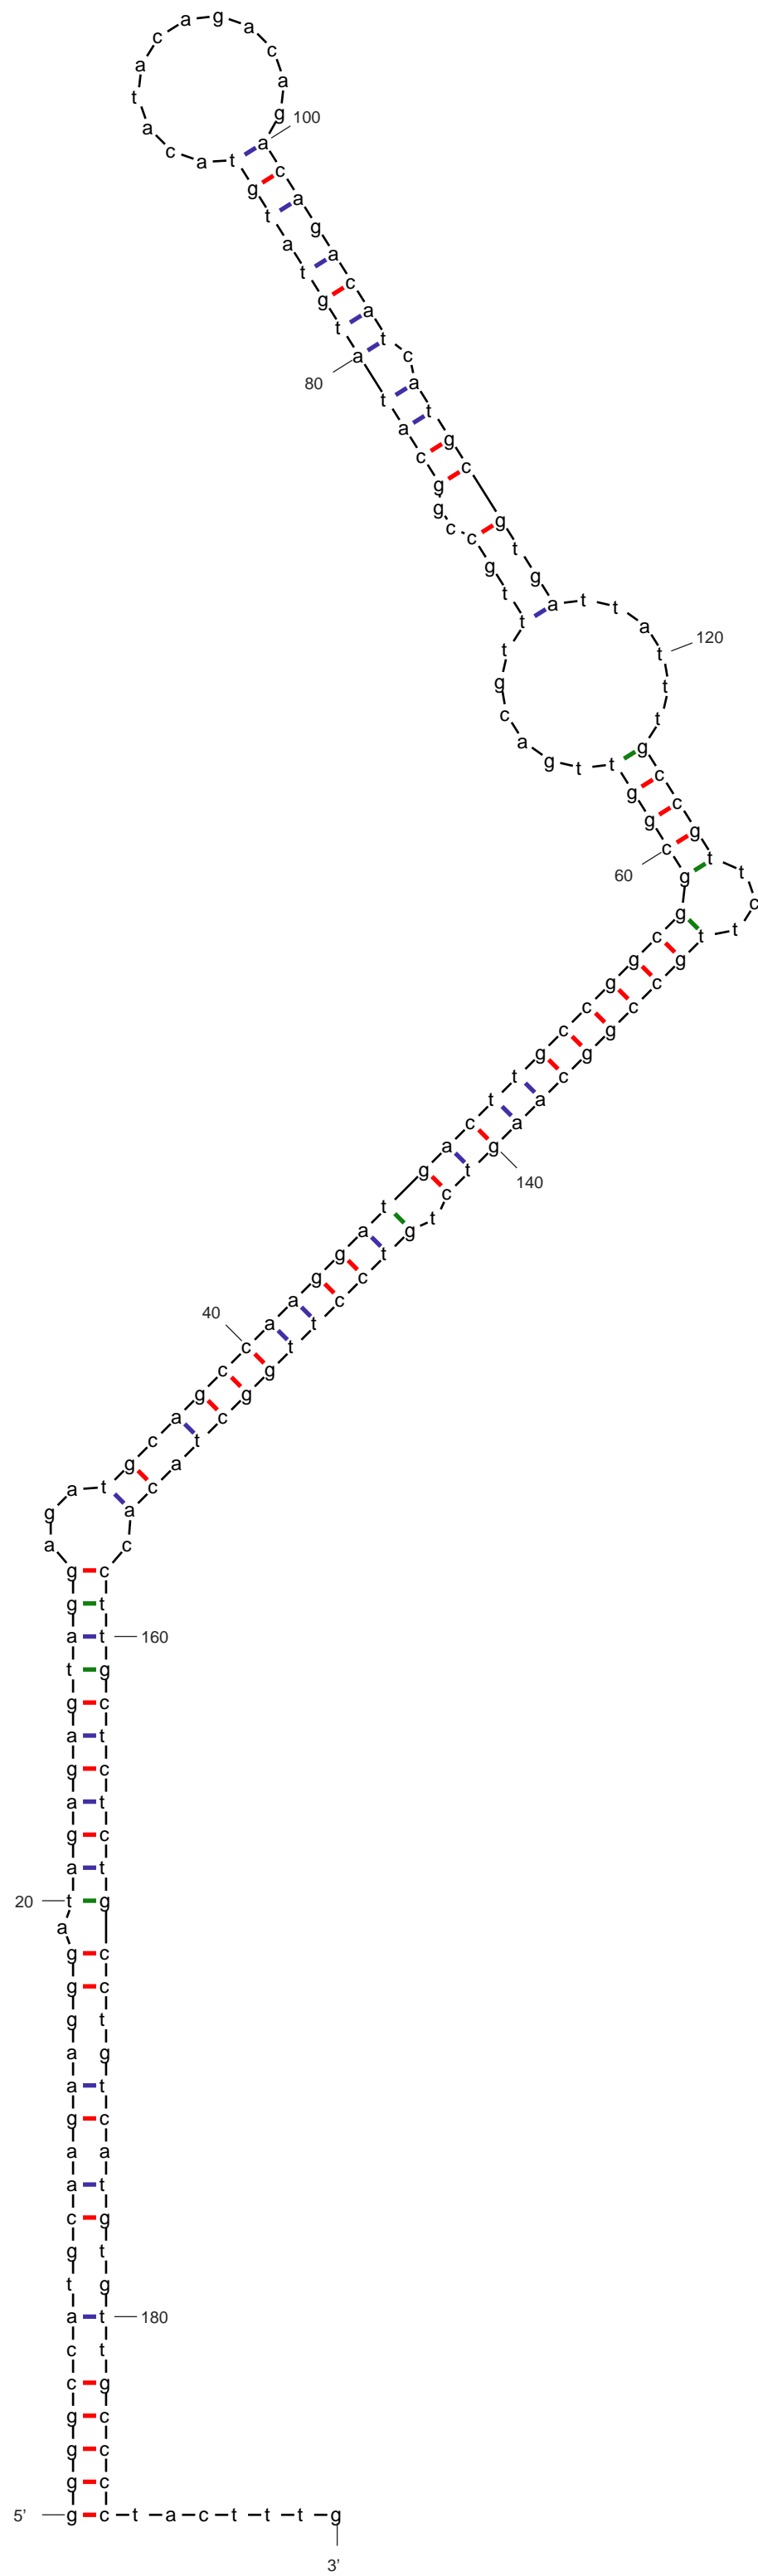

$dG = -94.7$  *sit\_novel\_miR35*

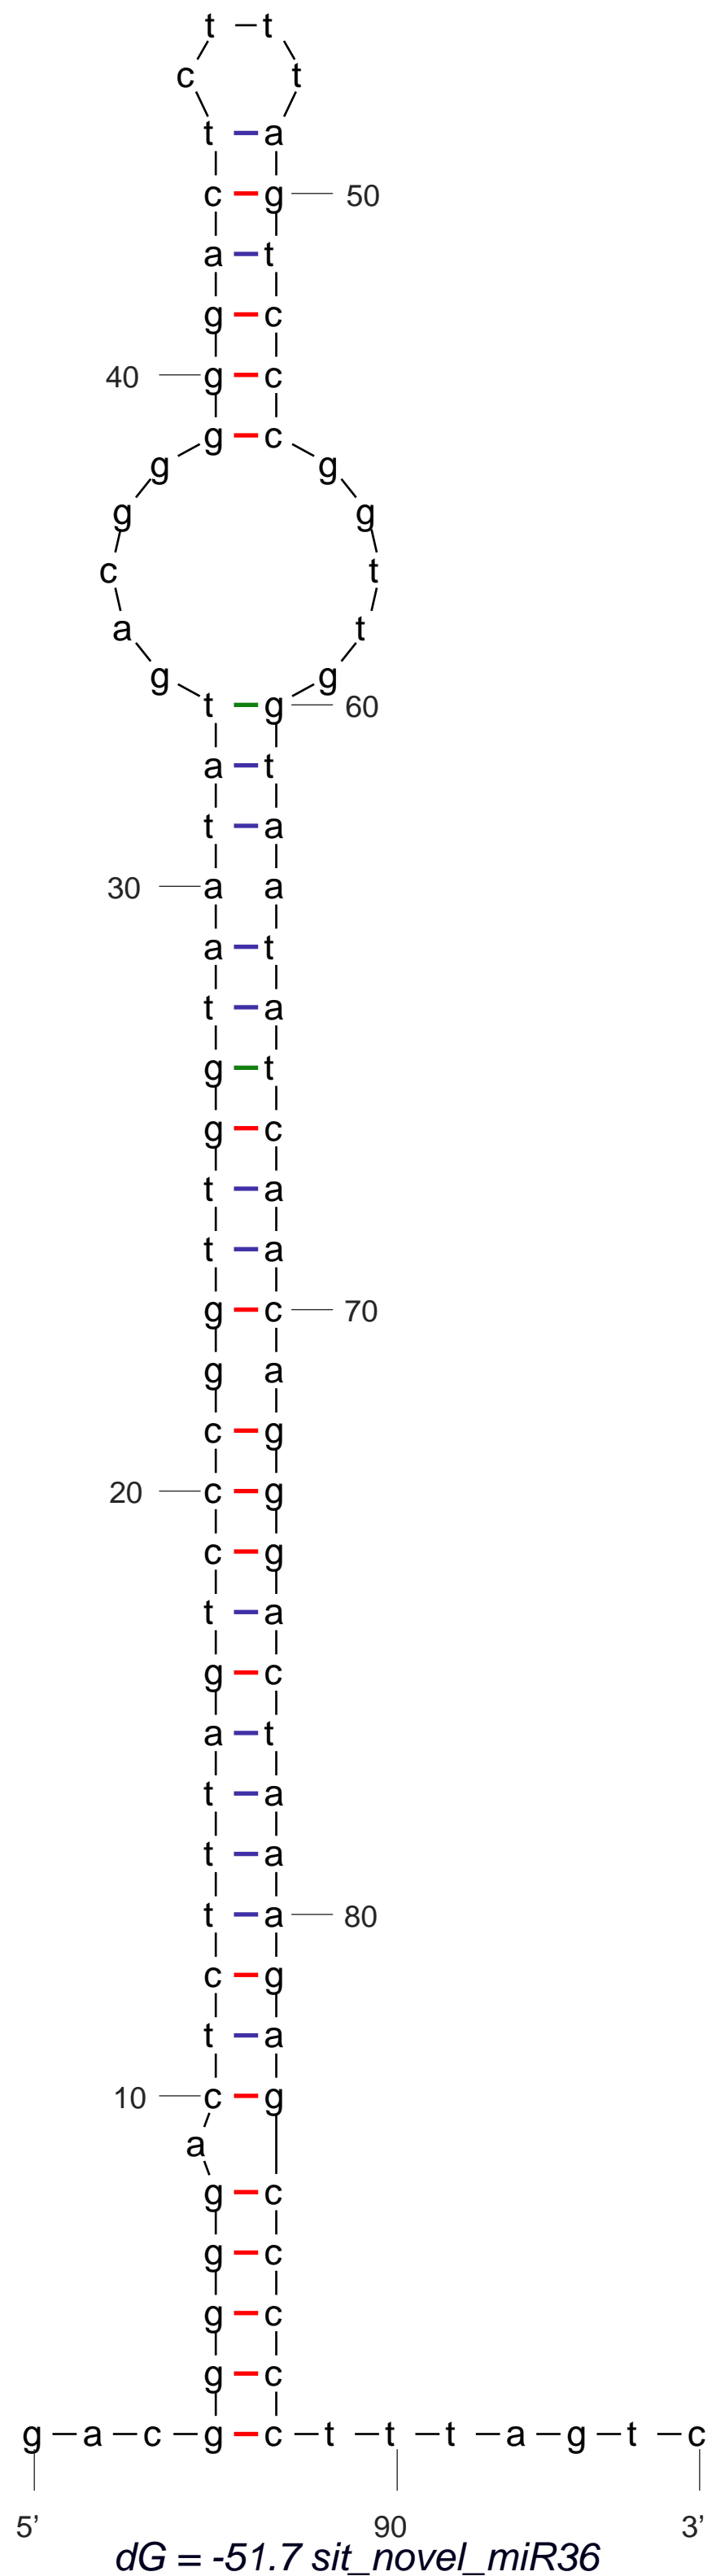

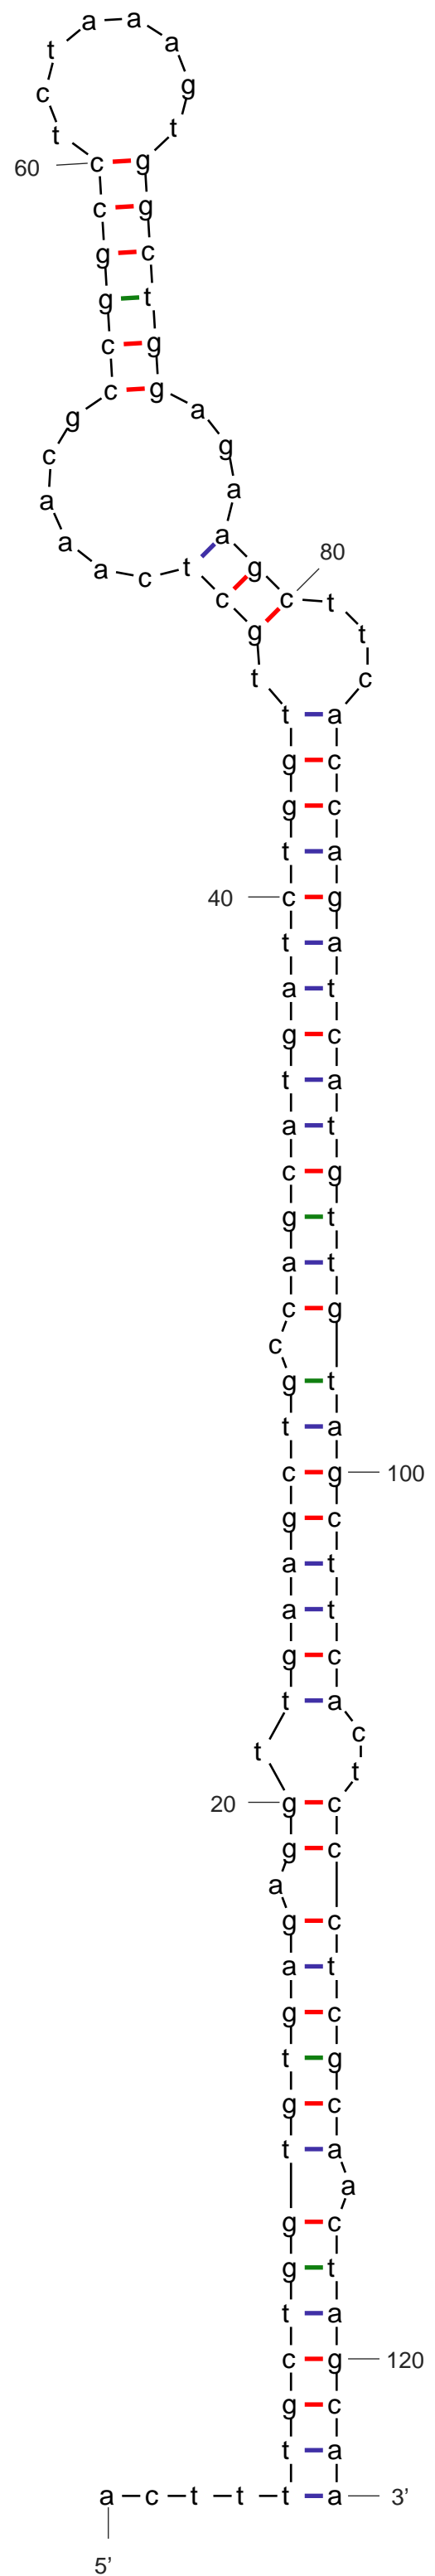

dG = -68.2 *sit\_novel\_miR37*

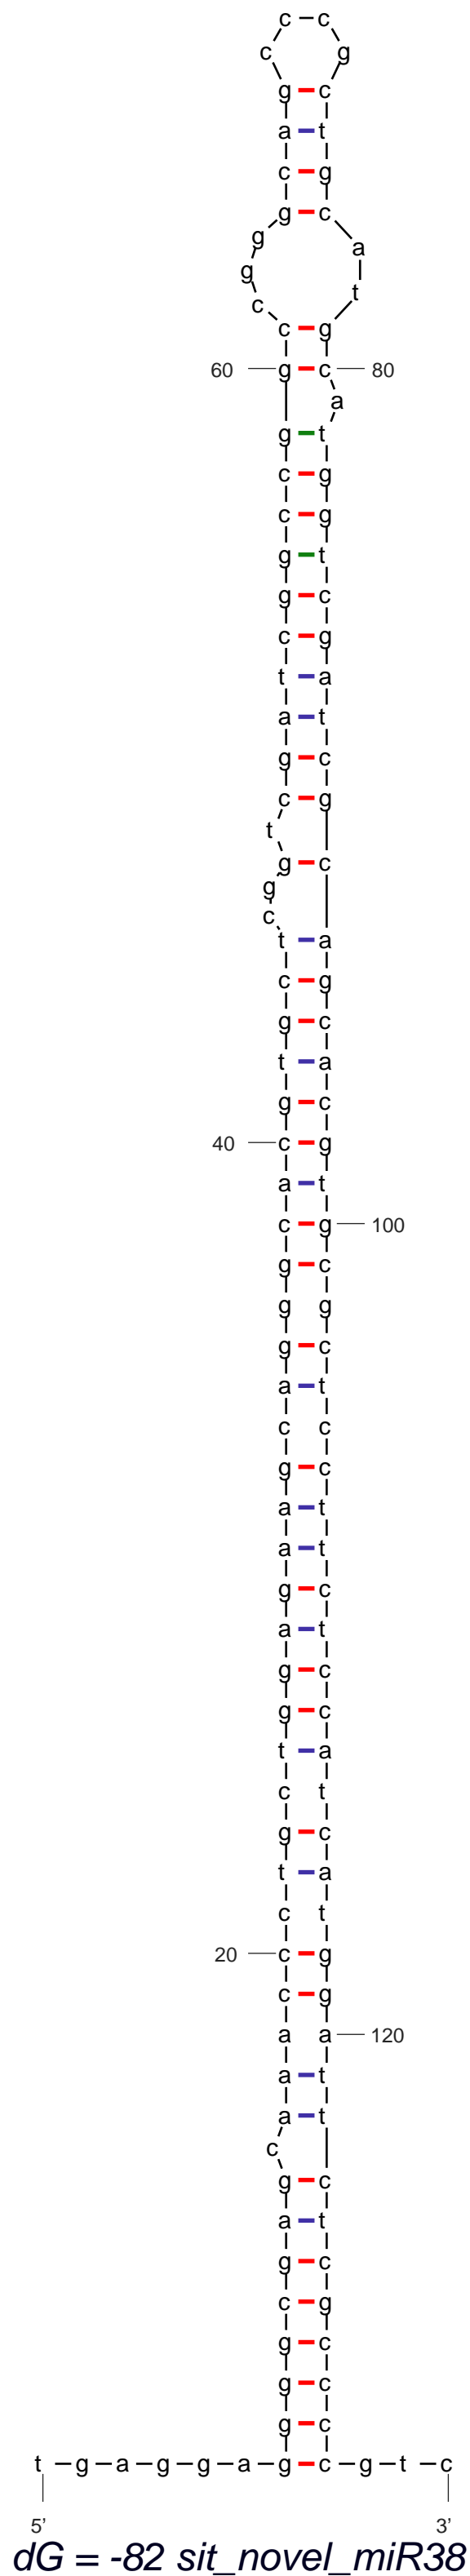

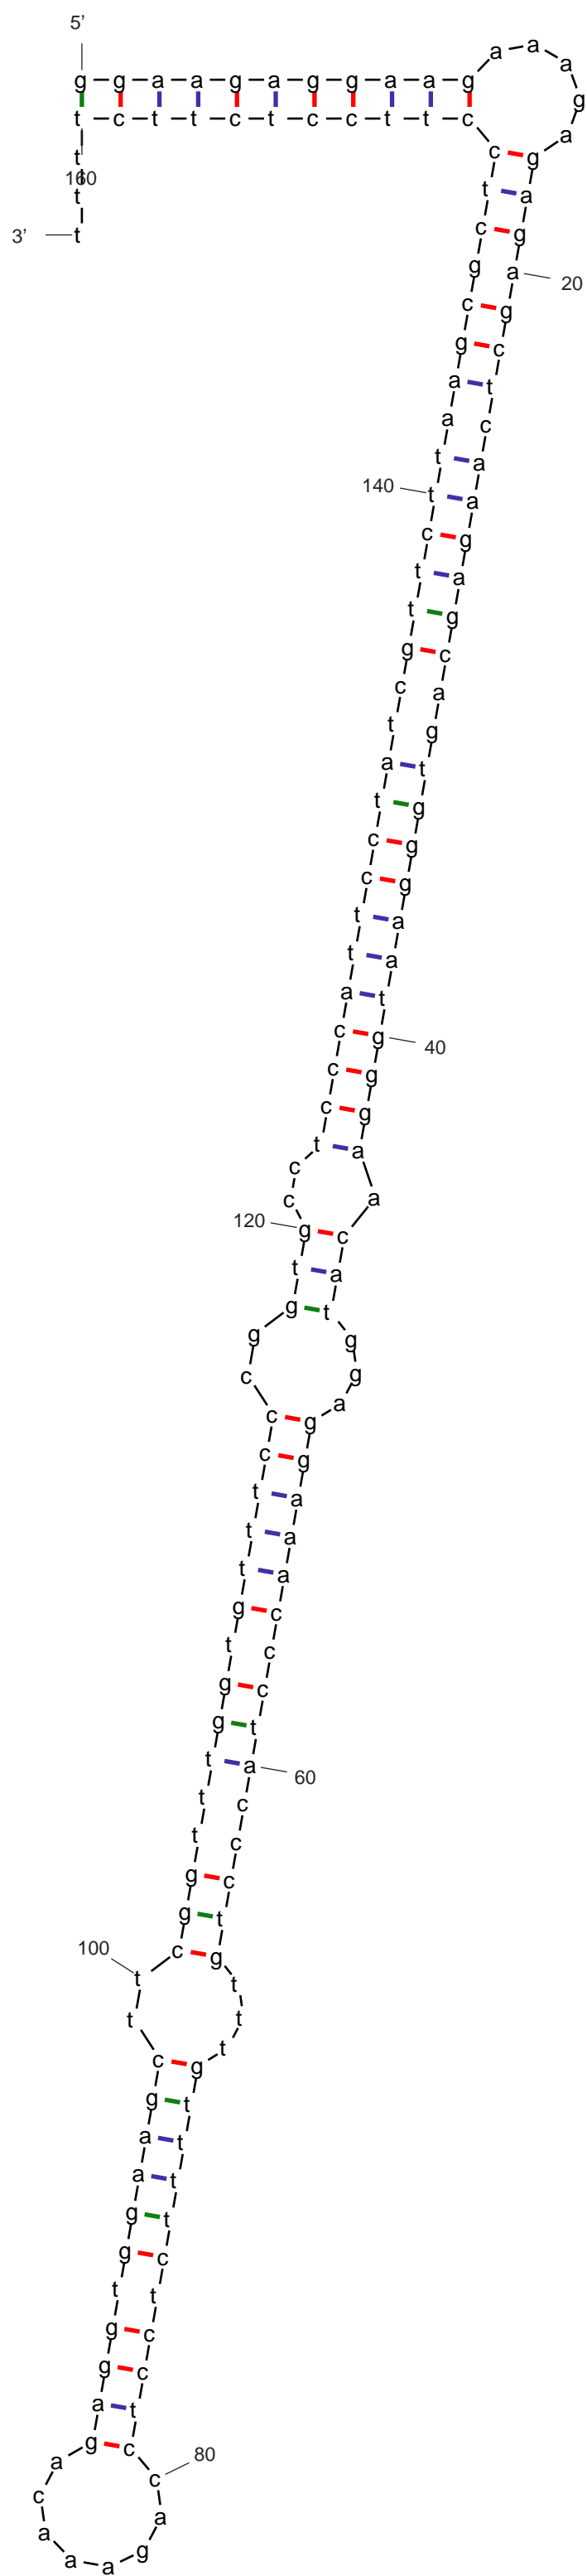

dG = -77.7 *sit\_novel\_miR39*

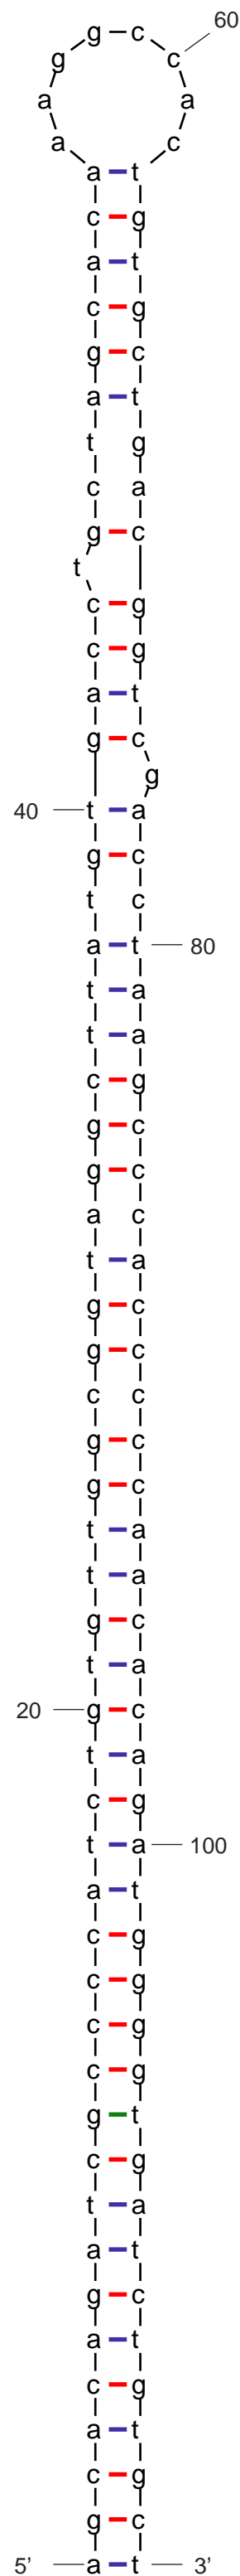

*dG = -83.1 sit\_novel\_miR40*



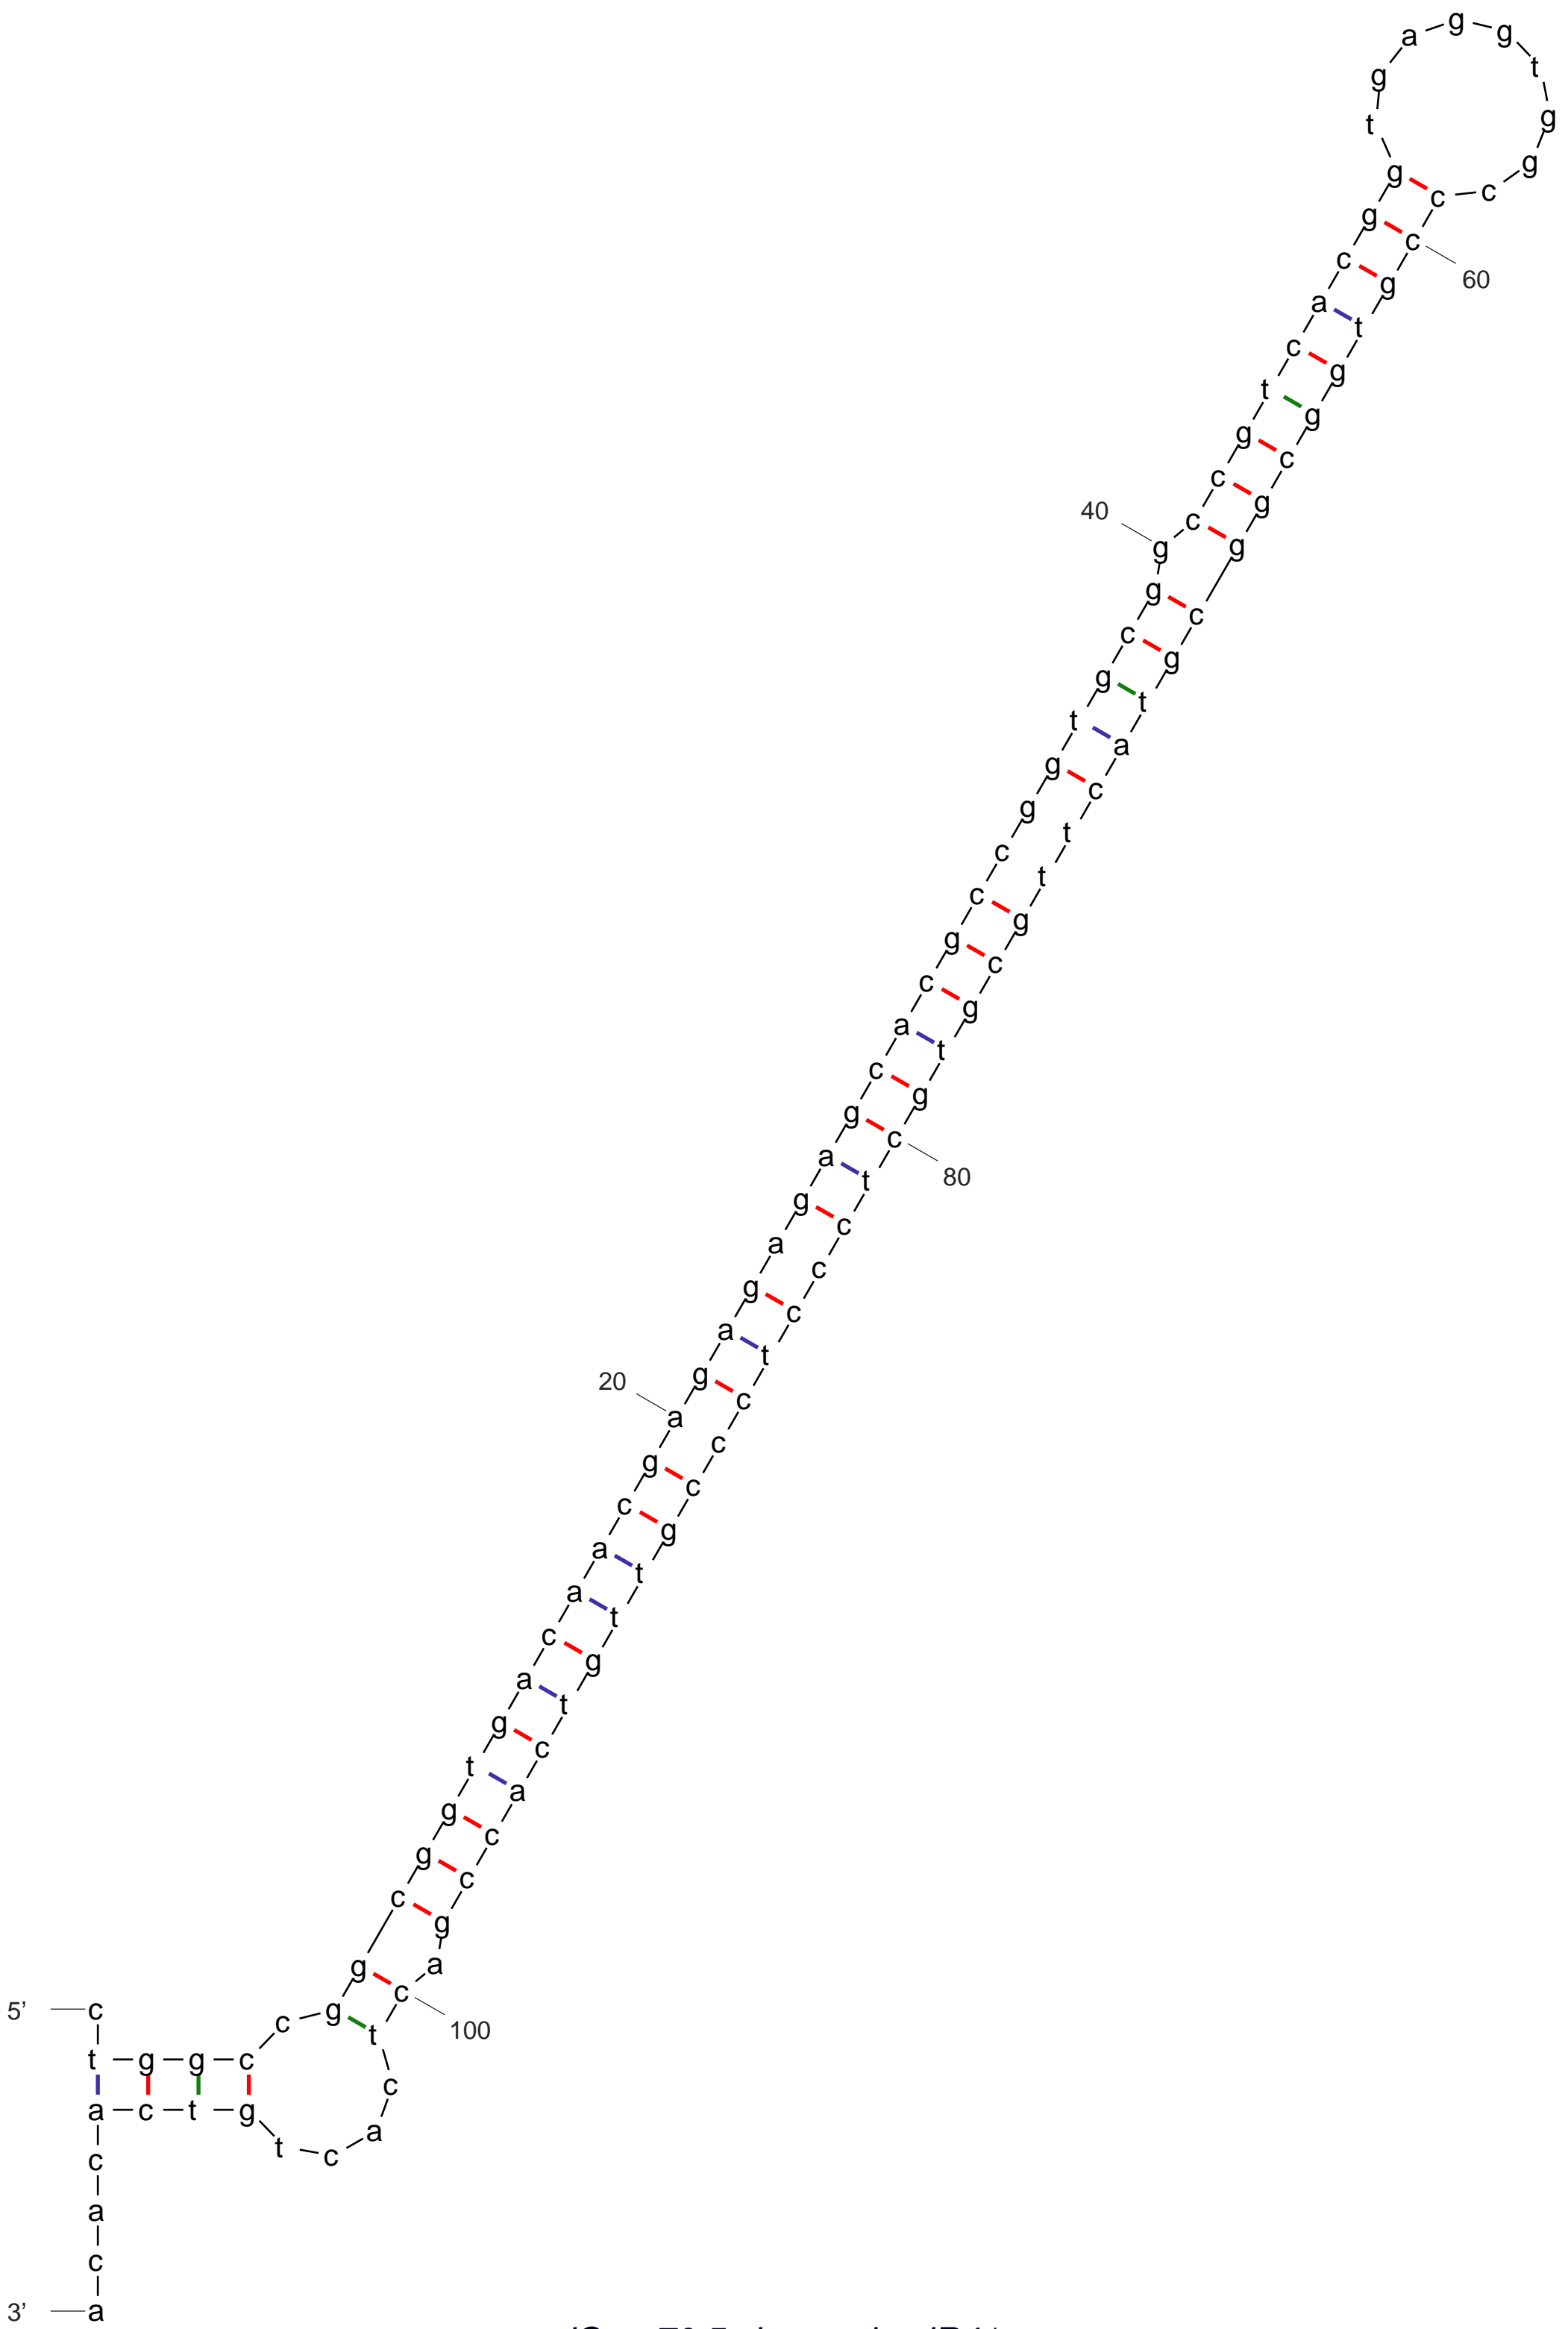

$dG = -70.5$  *sit\_novel\_miR41*

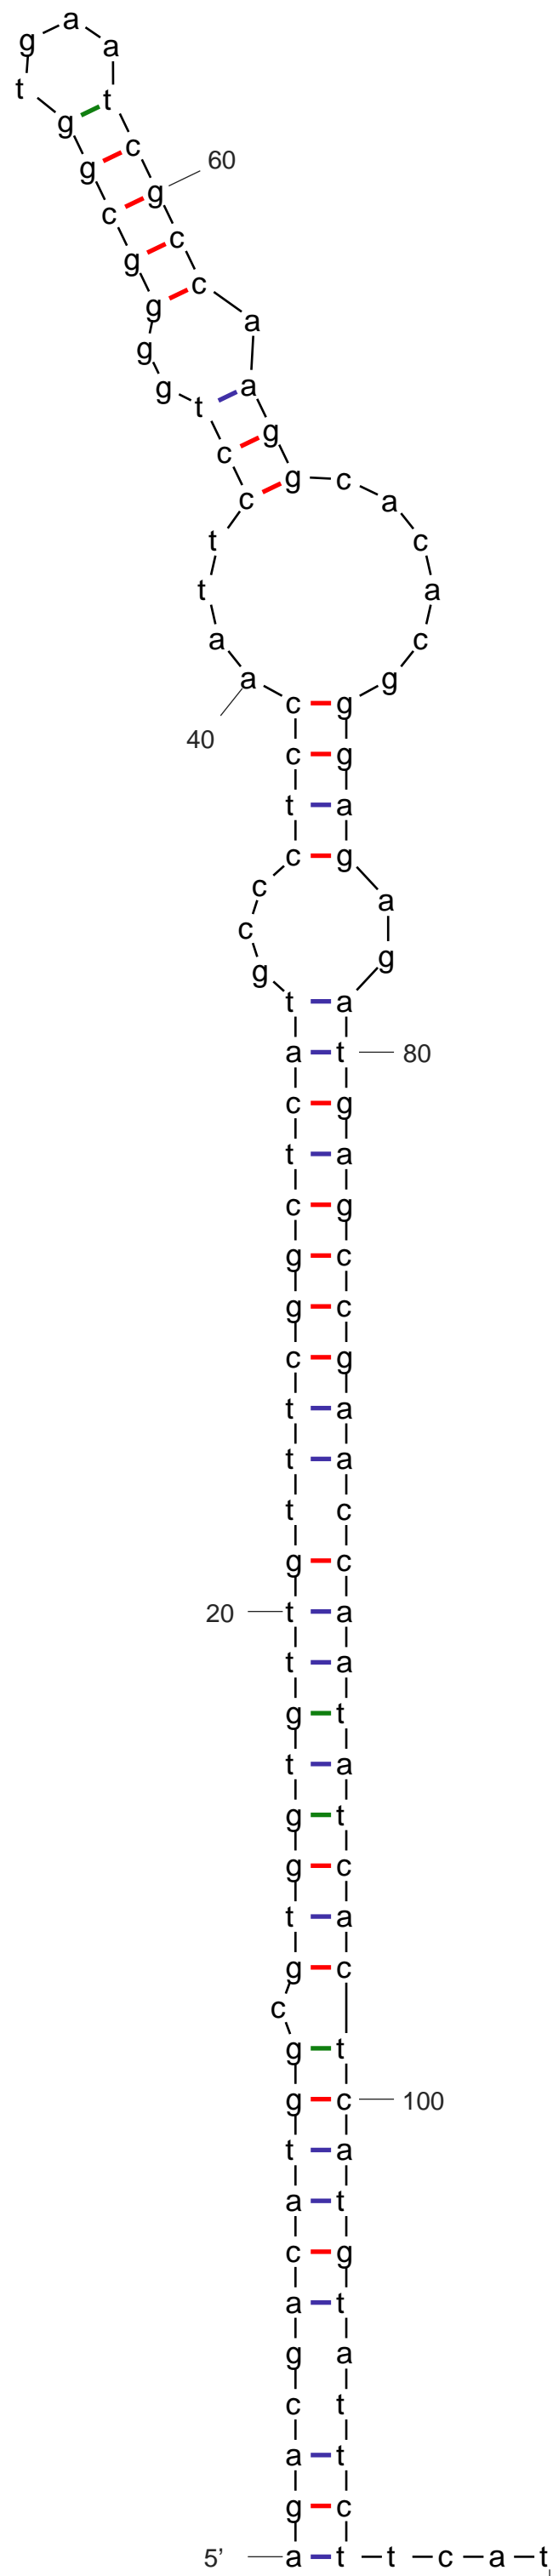

$dG = -52.5$  *sit\_novel\_miR42*

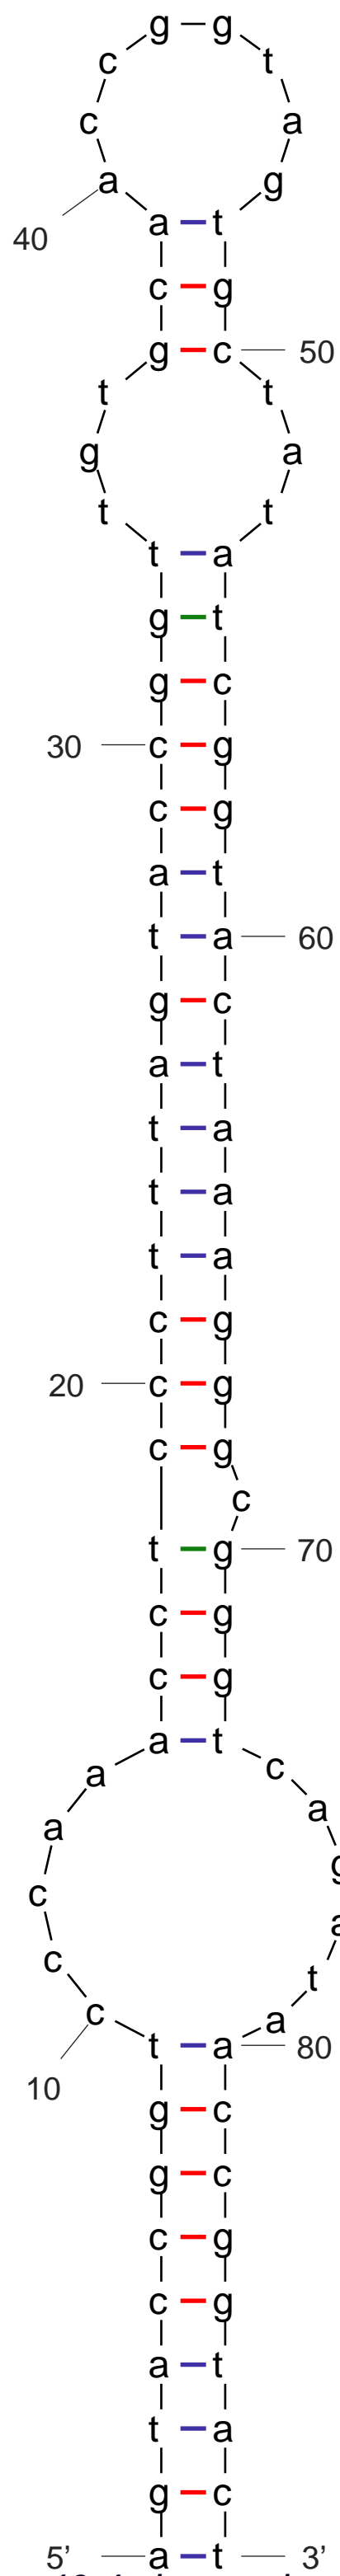

5' — a — t — 3'  
dG = -46.4 sit\_novel\_miR43

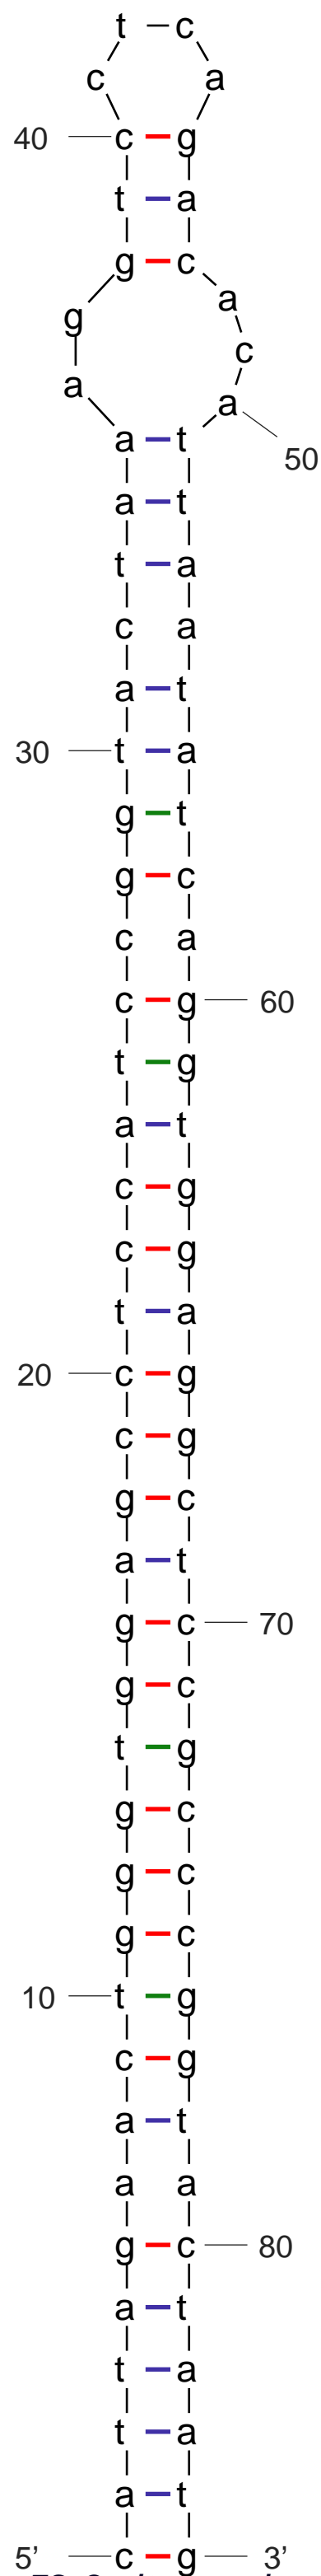

*dG = -52.3 sit\_novel\_miR44*

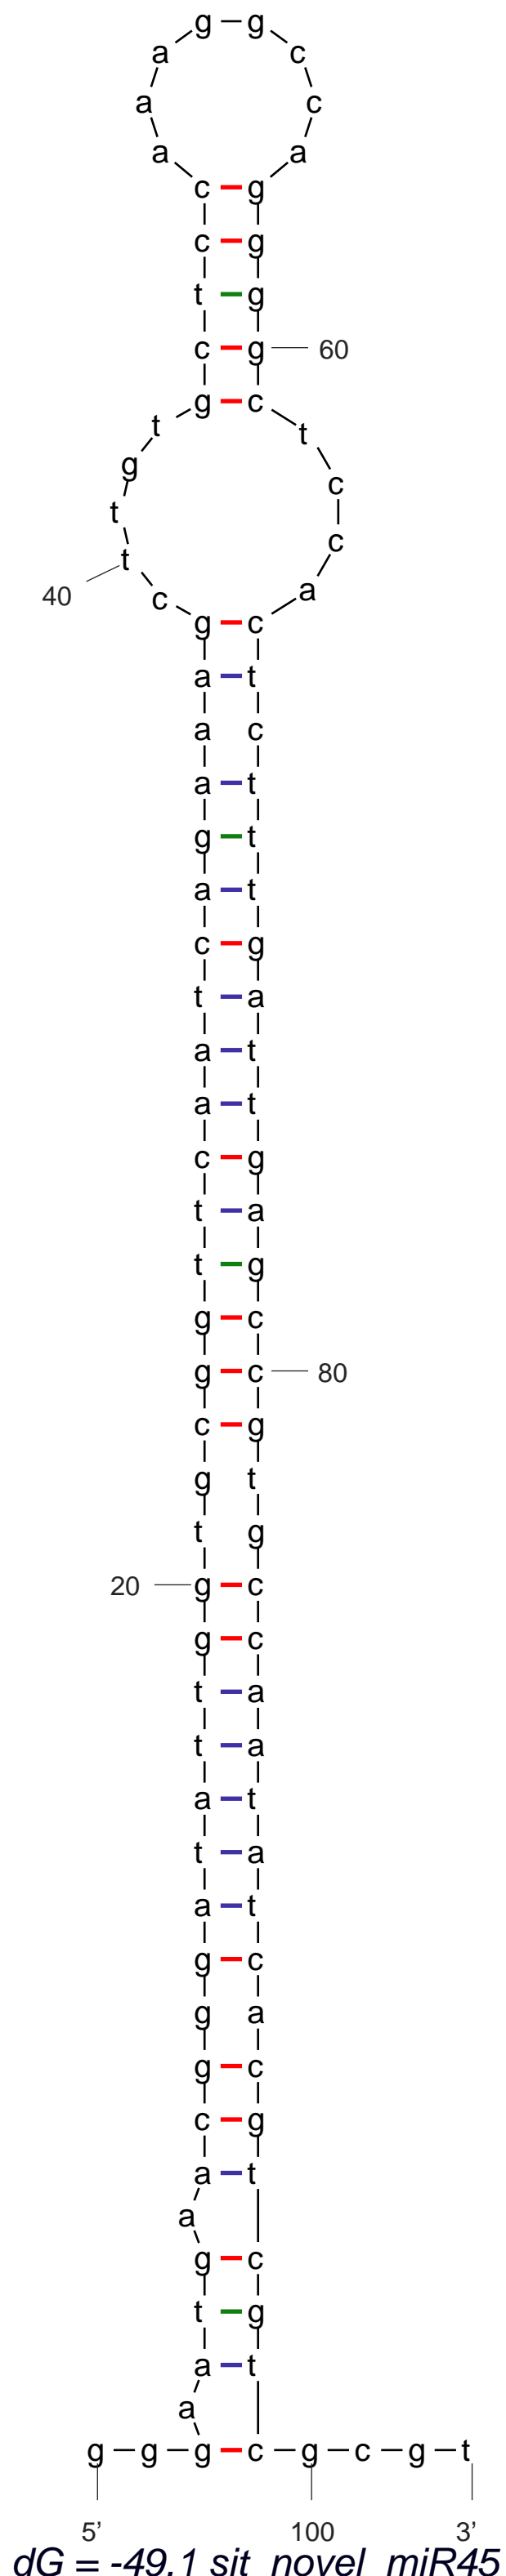



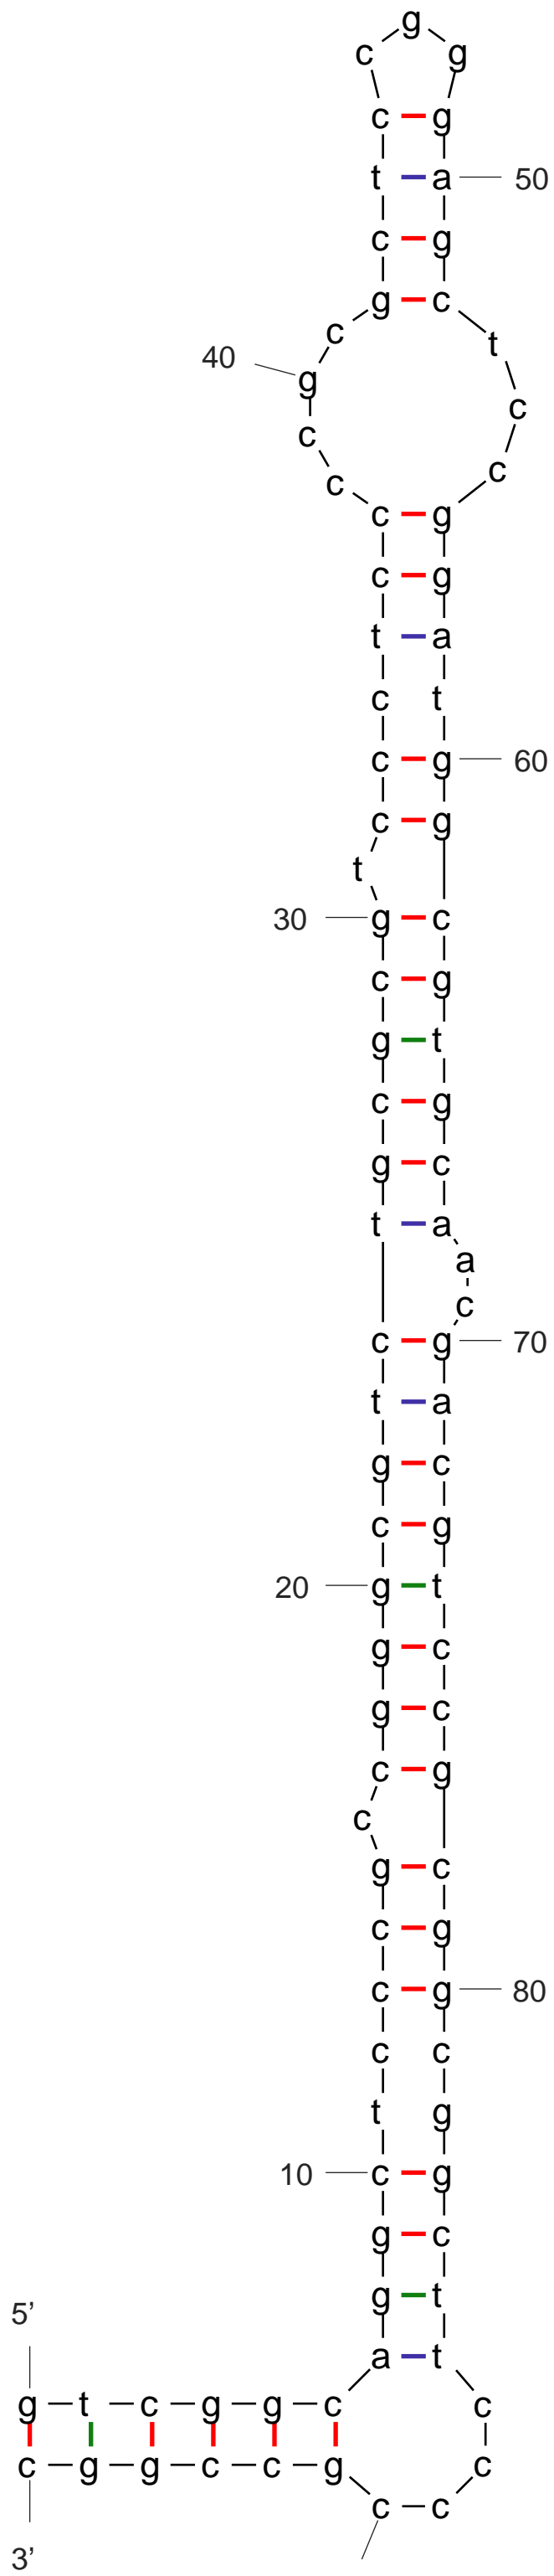

*dG = -53.2 sit\_novel\_miR47*

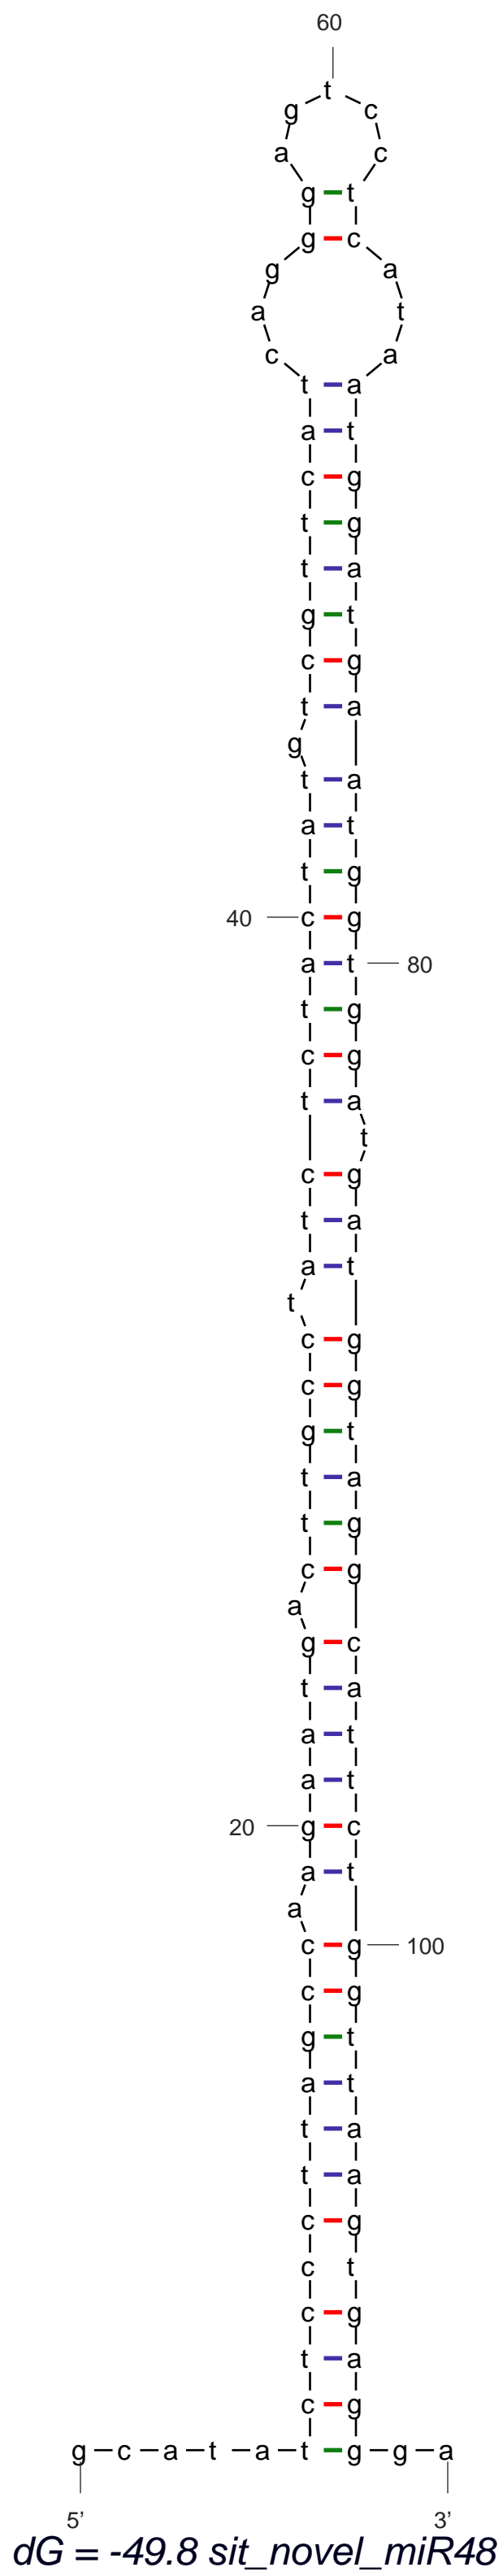



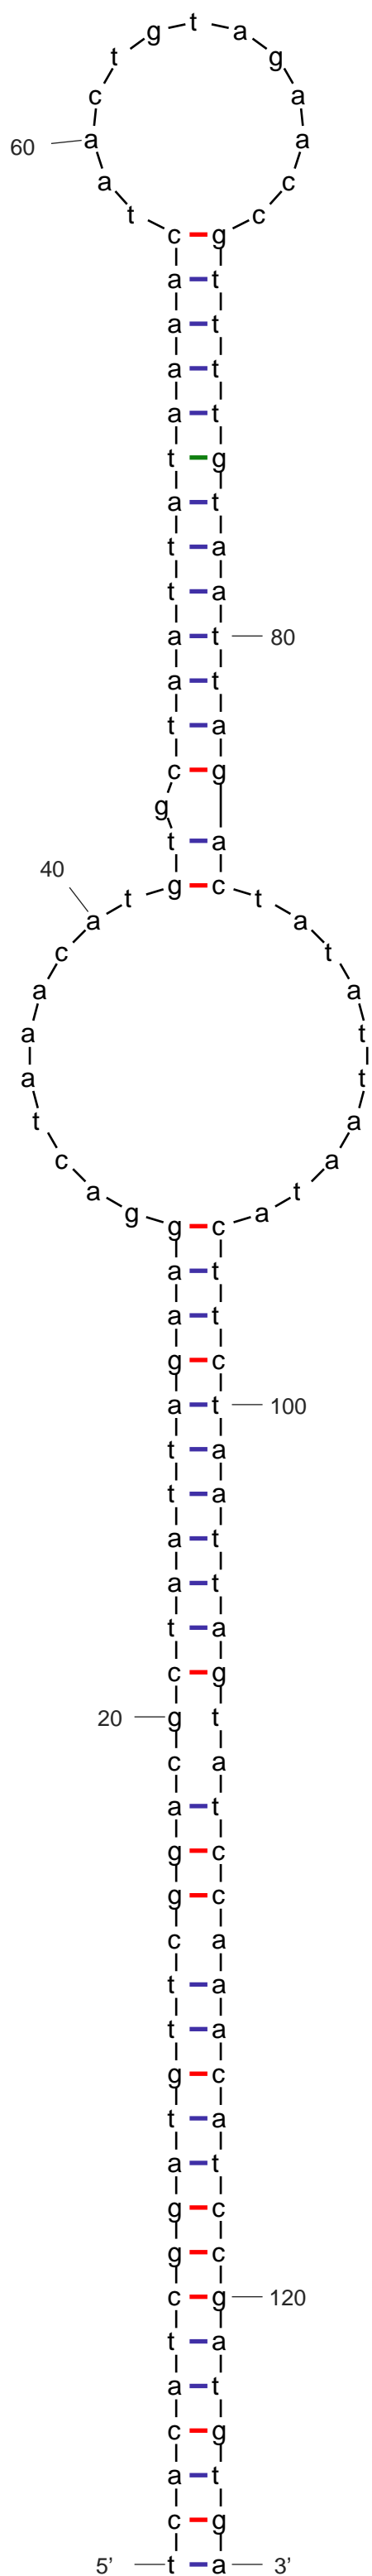

dG = -56 sit\_novel\_miR49



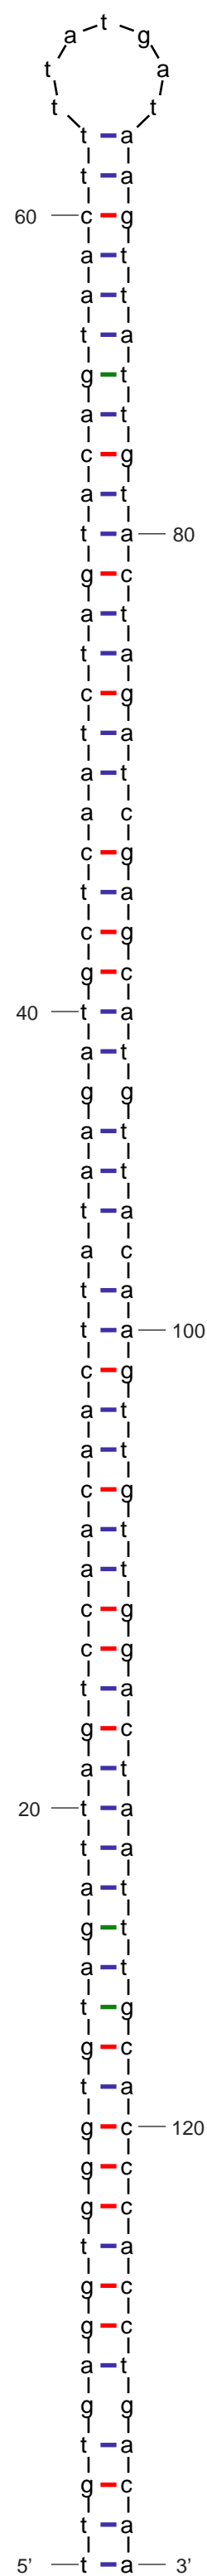

*dG = -89.8 sit\_novel\_miR51-1*

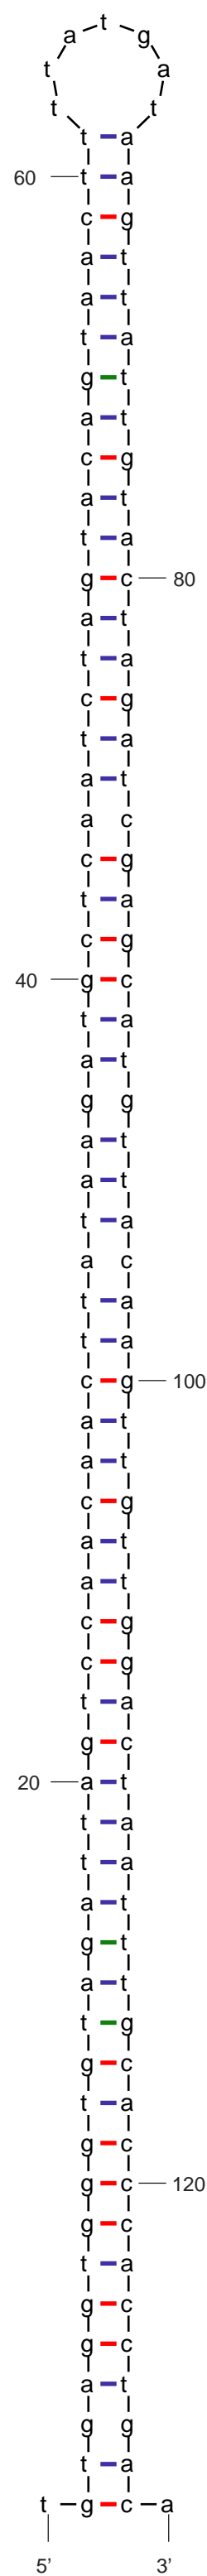

*dG = -89 sit\_novel\_miR51-2*

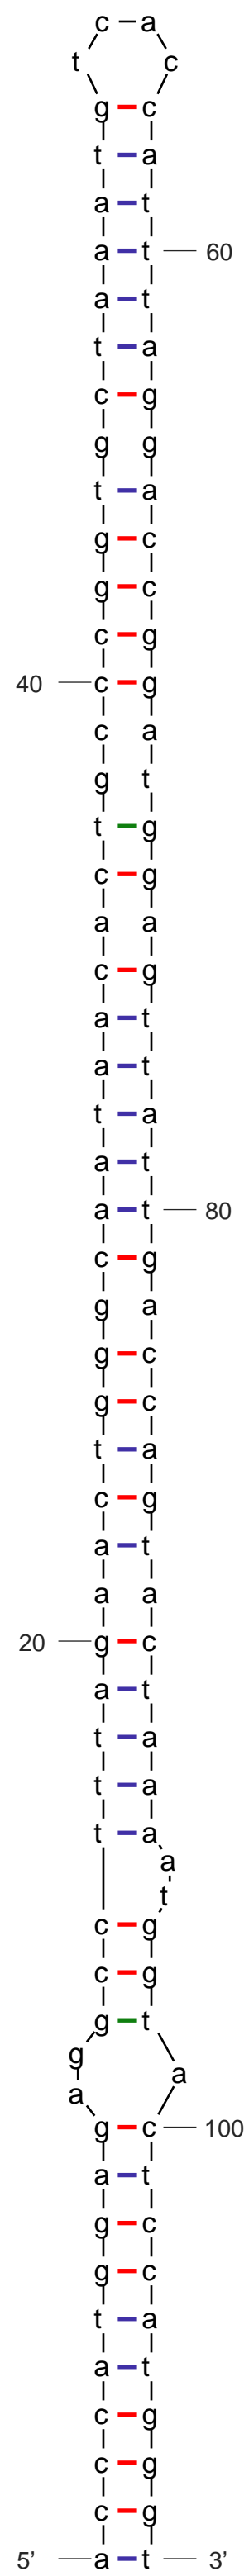

$dG = -60.8$  *sit\_novel\_miR52*

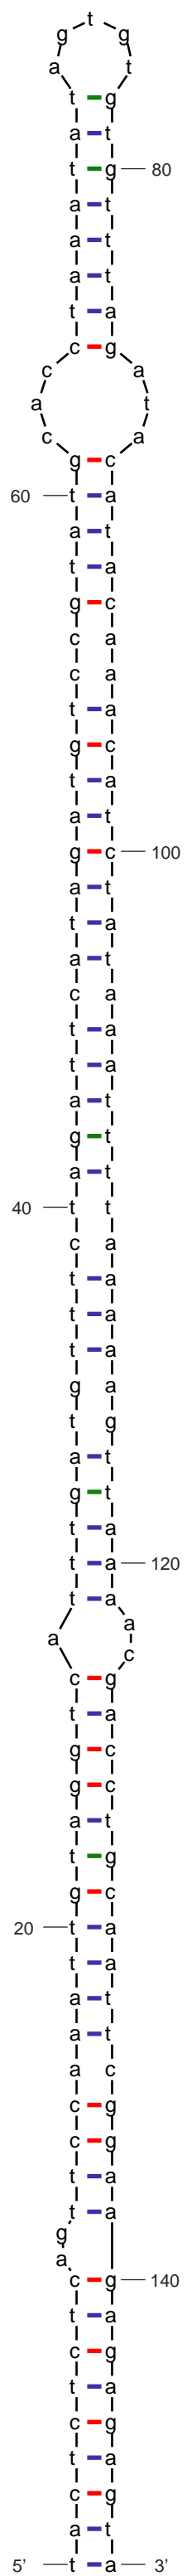

$dG = -58.9$  *sit\_novel\_miR53*

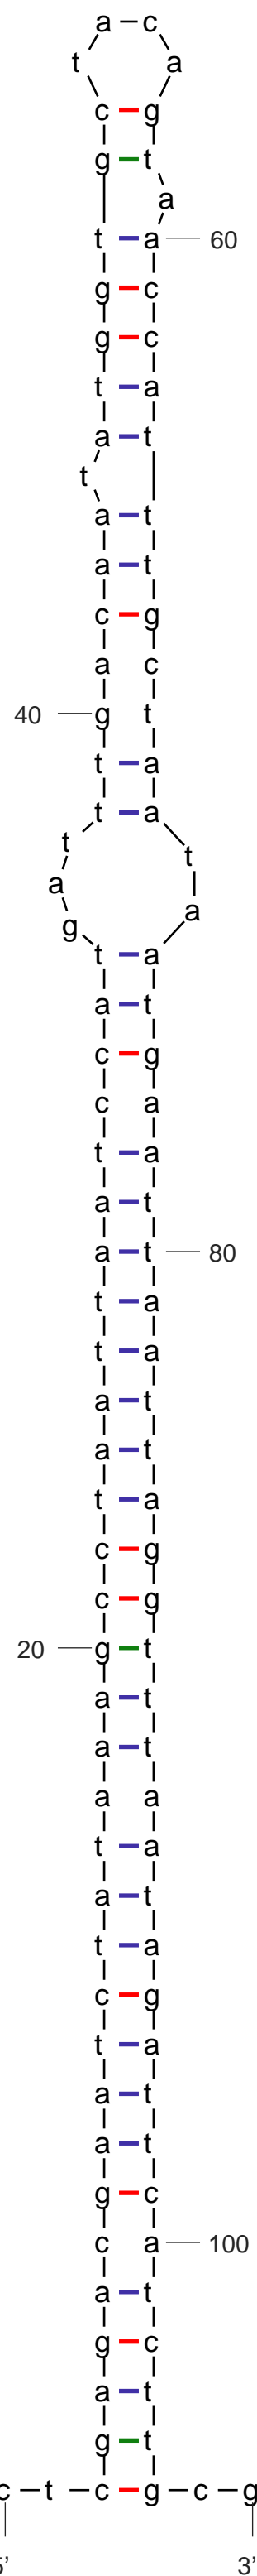

$dG = -38.5$  *sit\_novel\_miR54*

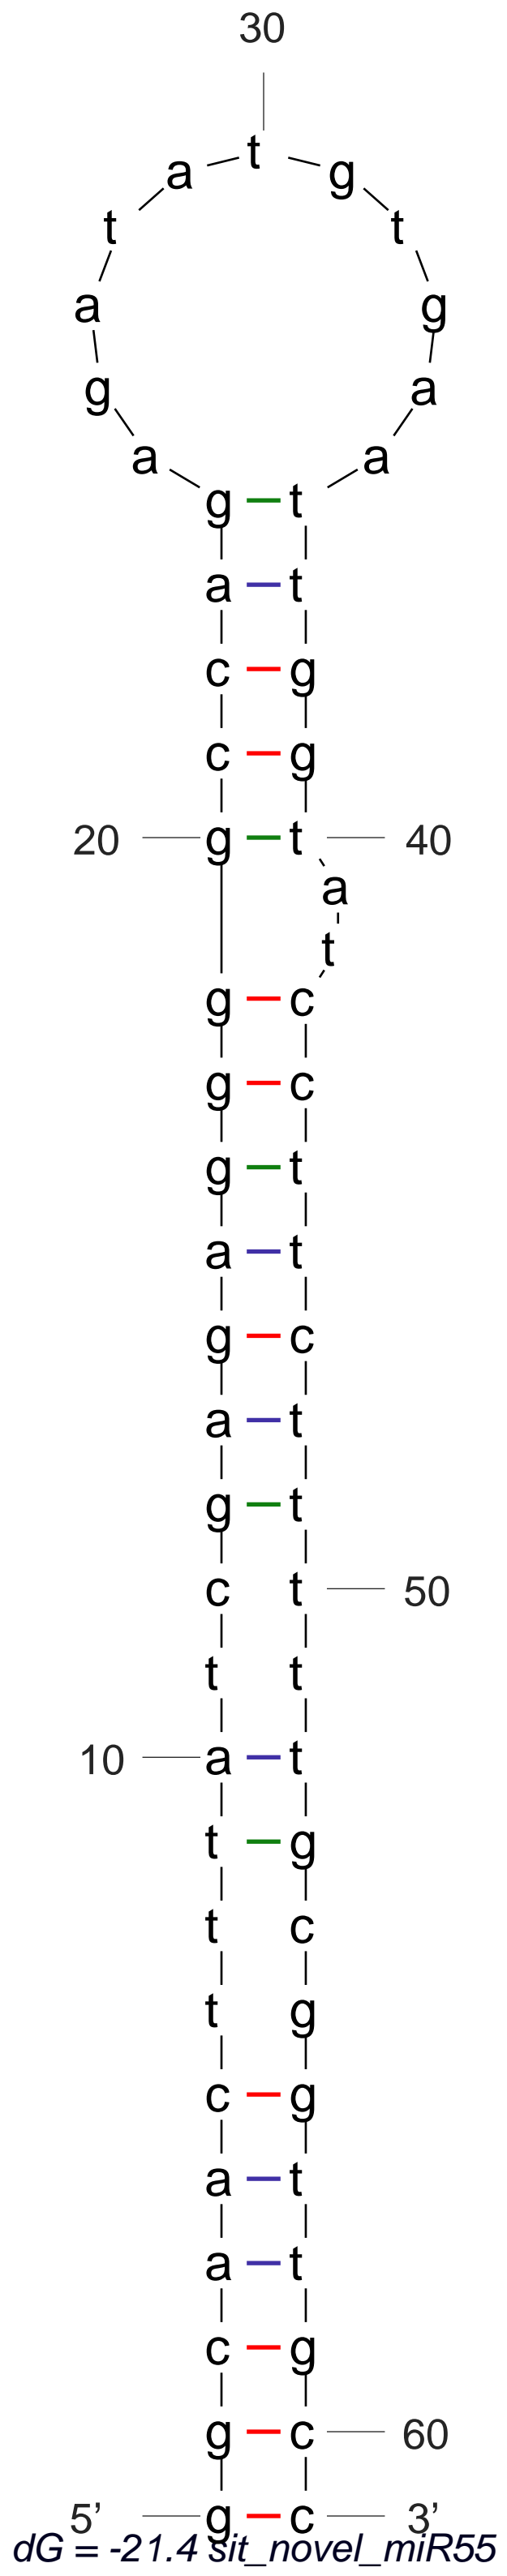



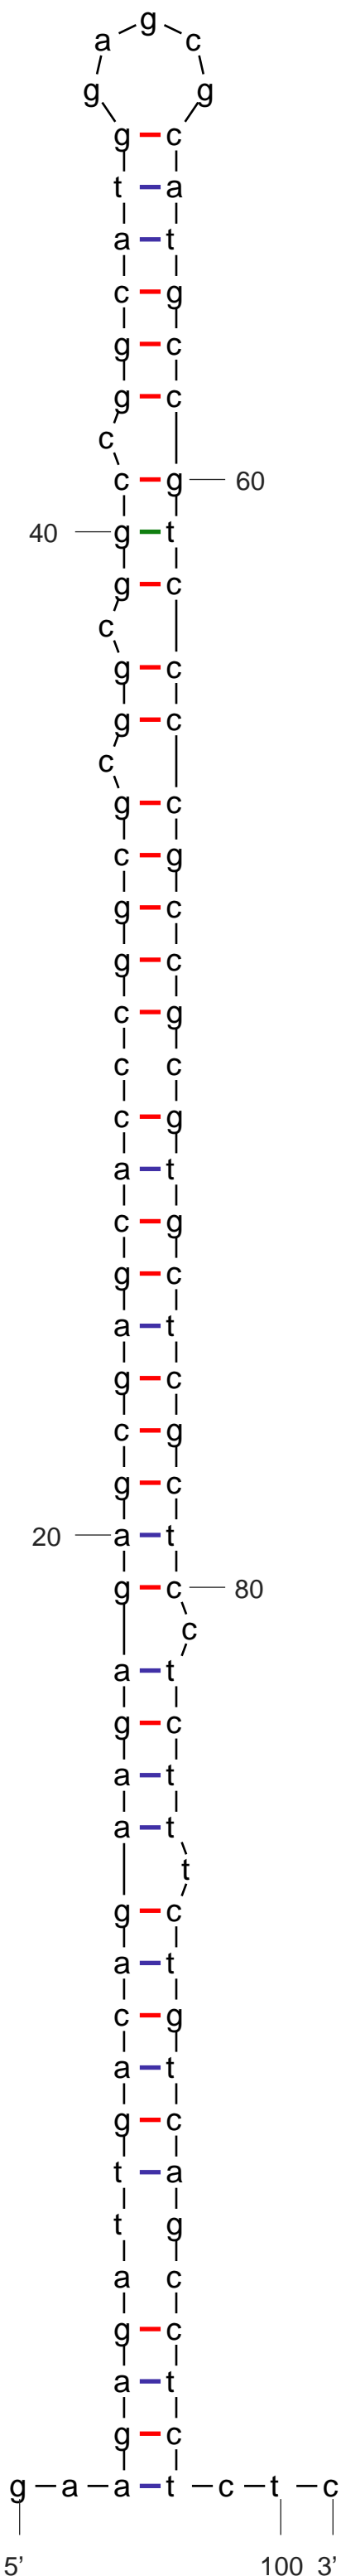

$dG = -65.8$  *sit\_novel\_miR56*

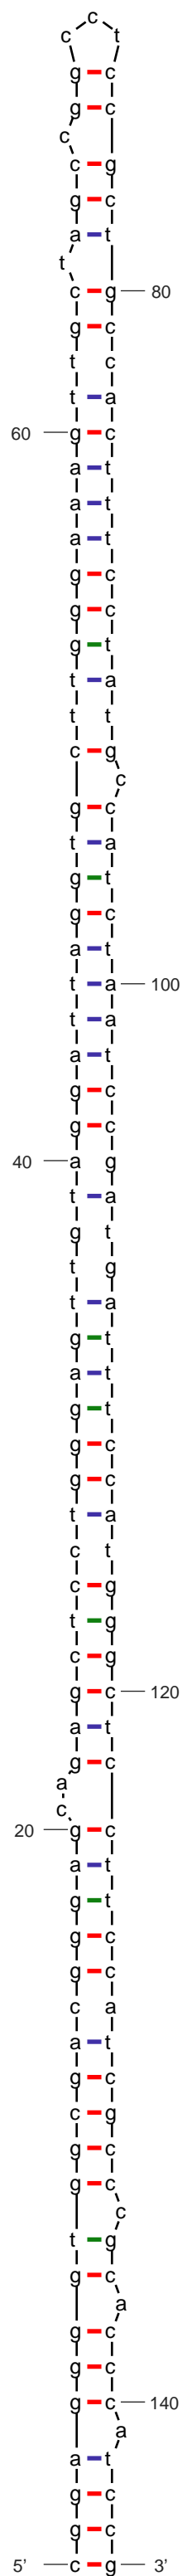

dG = -82.2 sit\_novel\_miR57-1

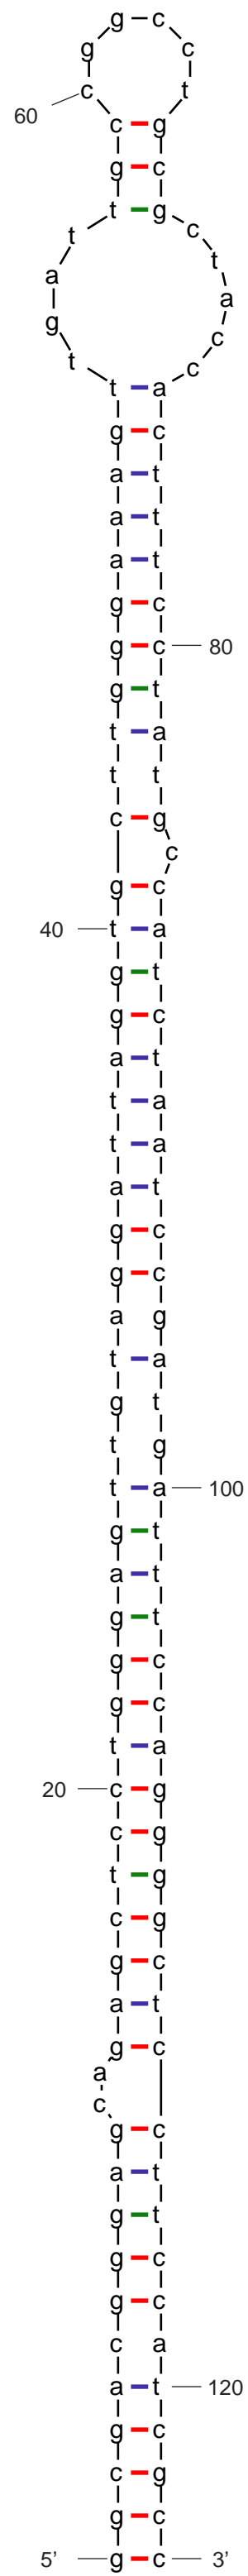

$dG = -69.7$  *sit\_novel\_miR57-2*

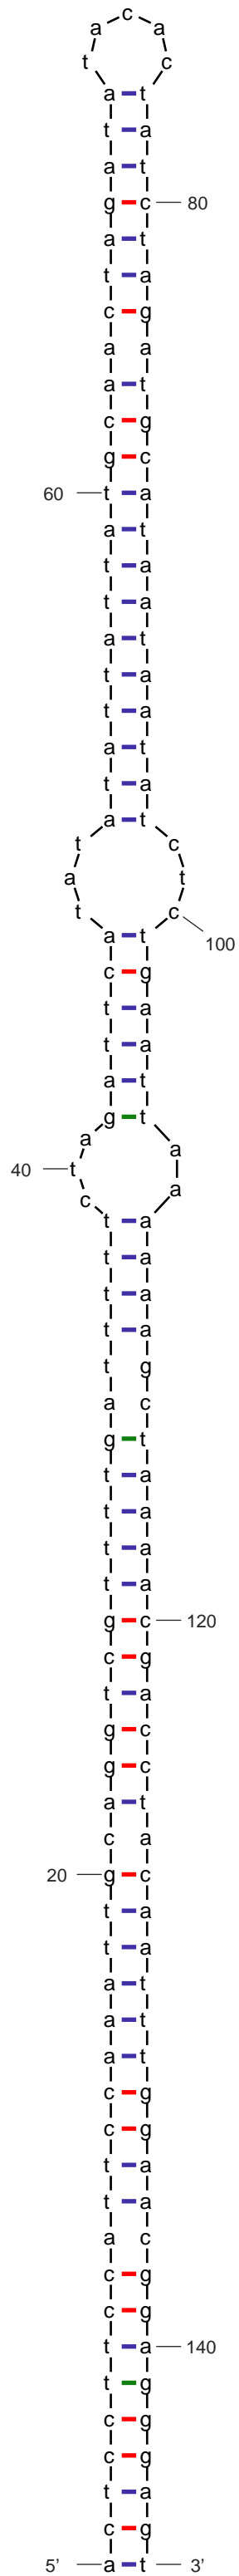

$dG = -72.4$  *sit\_novel\_miR58*

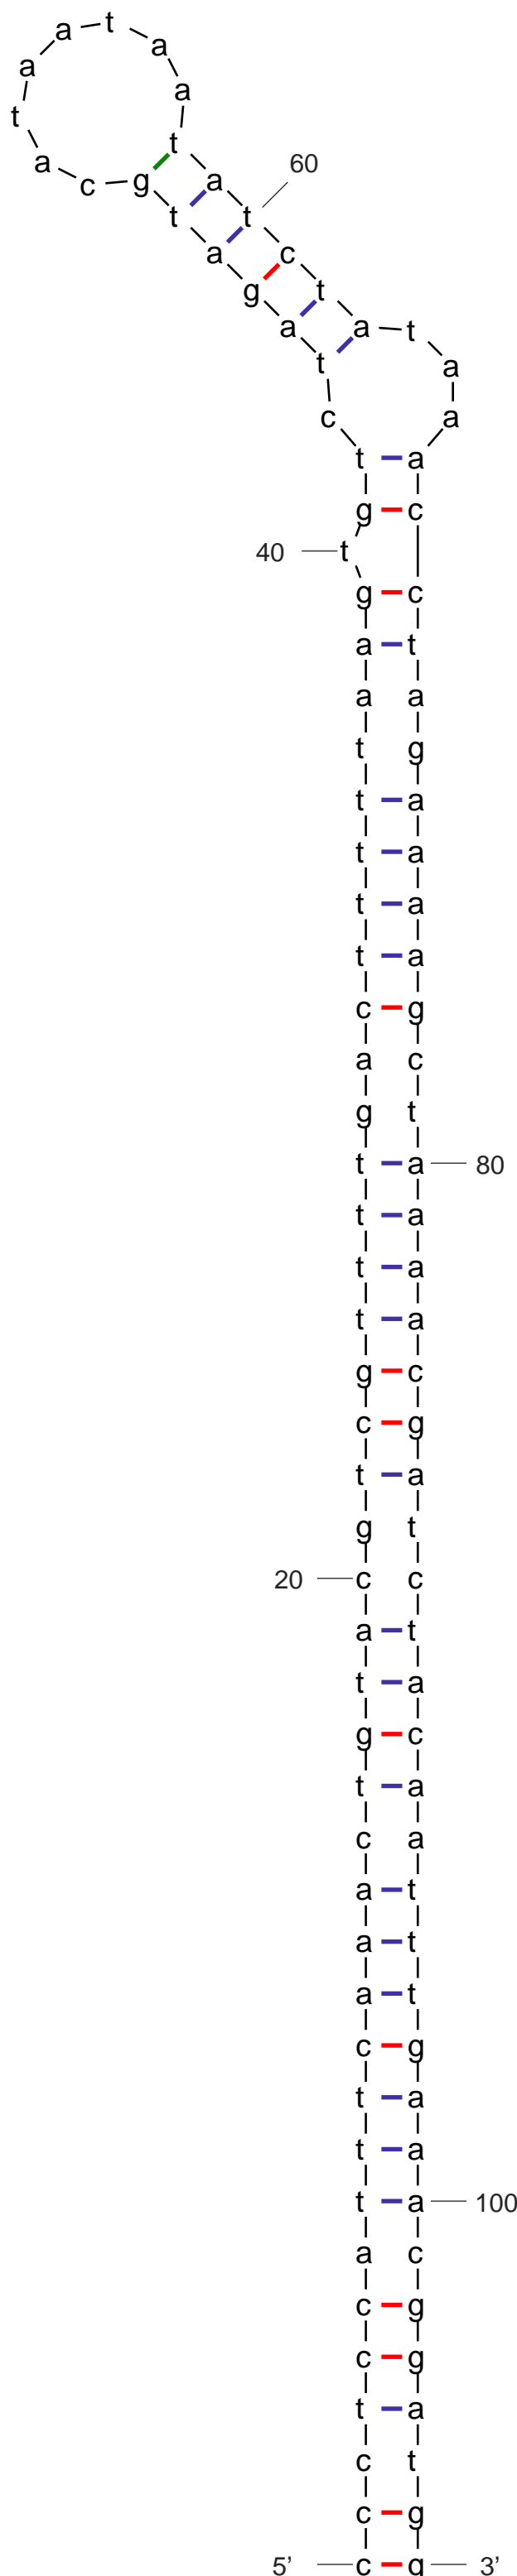

$dG = -33.1$  *sit\_novel\_miR59*

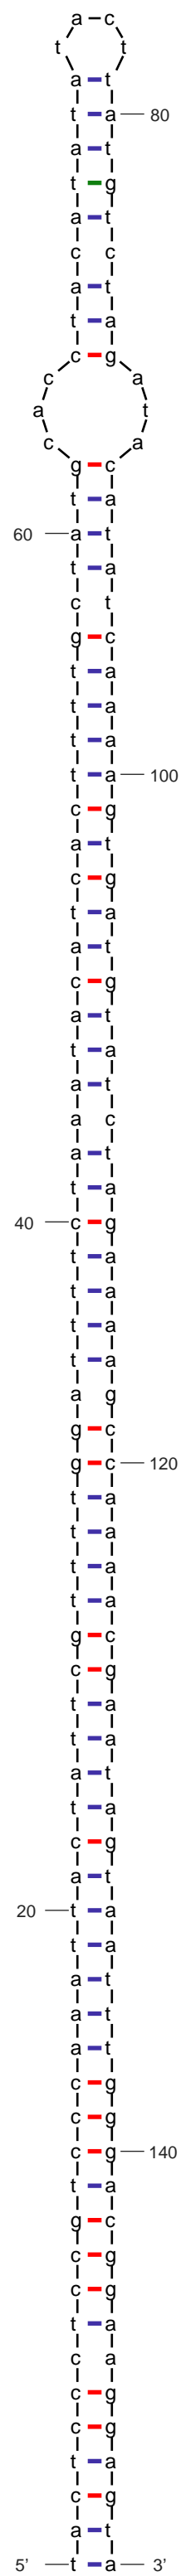

*dG = -89.4 sit\_novel\_miR60-1*

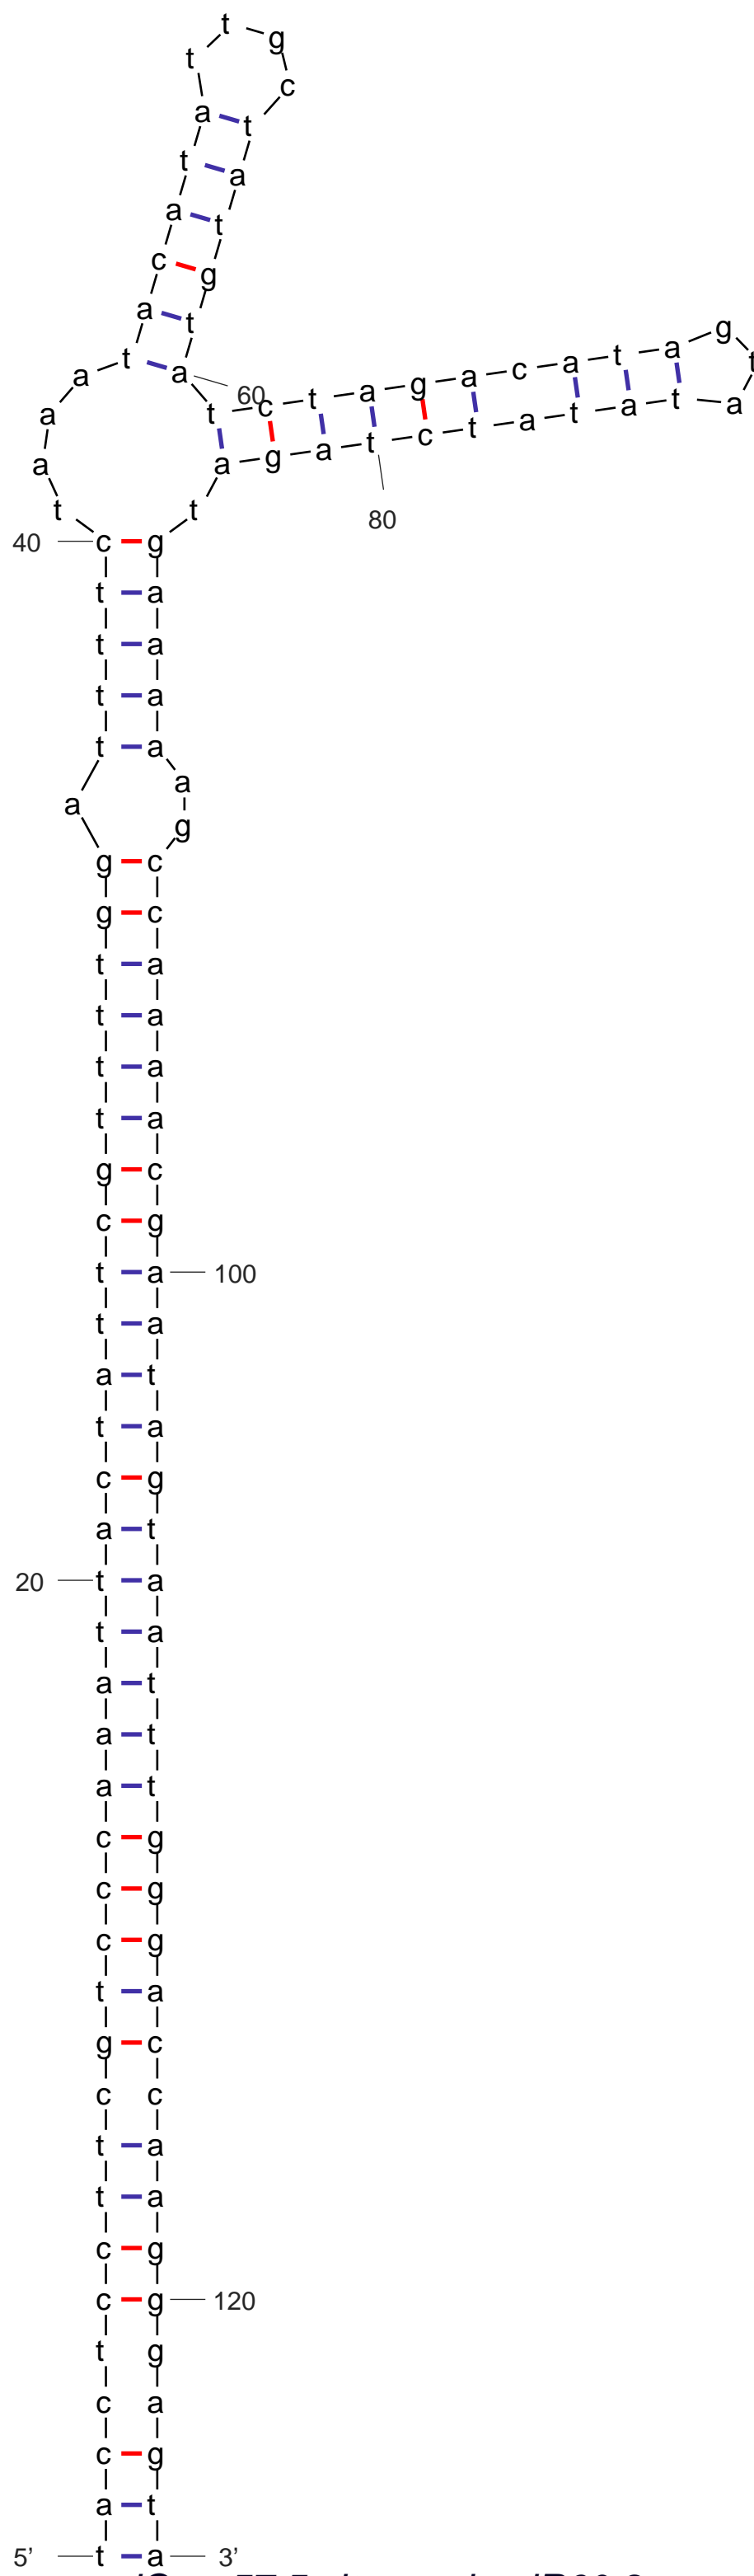

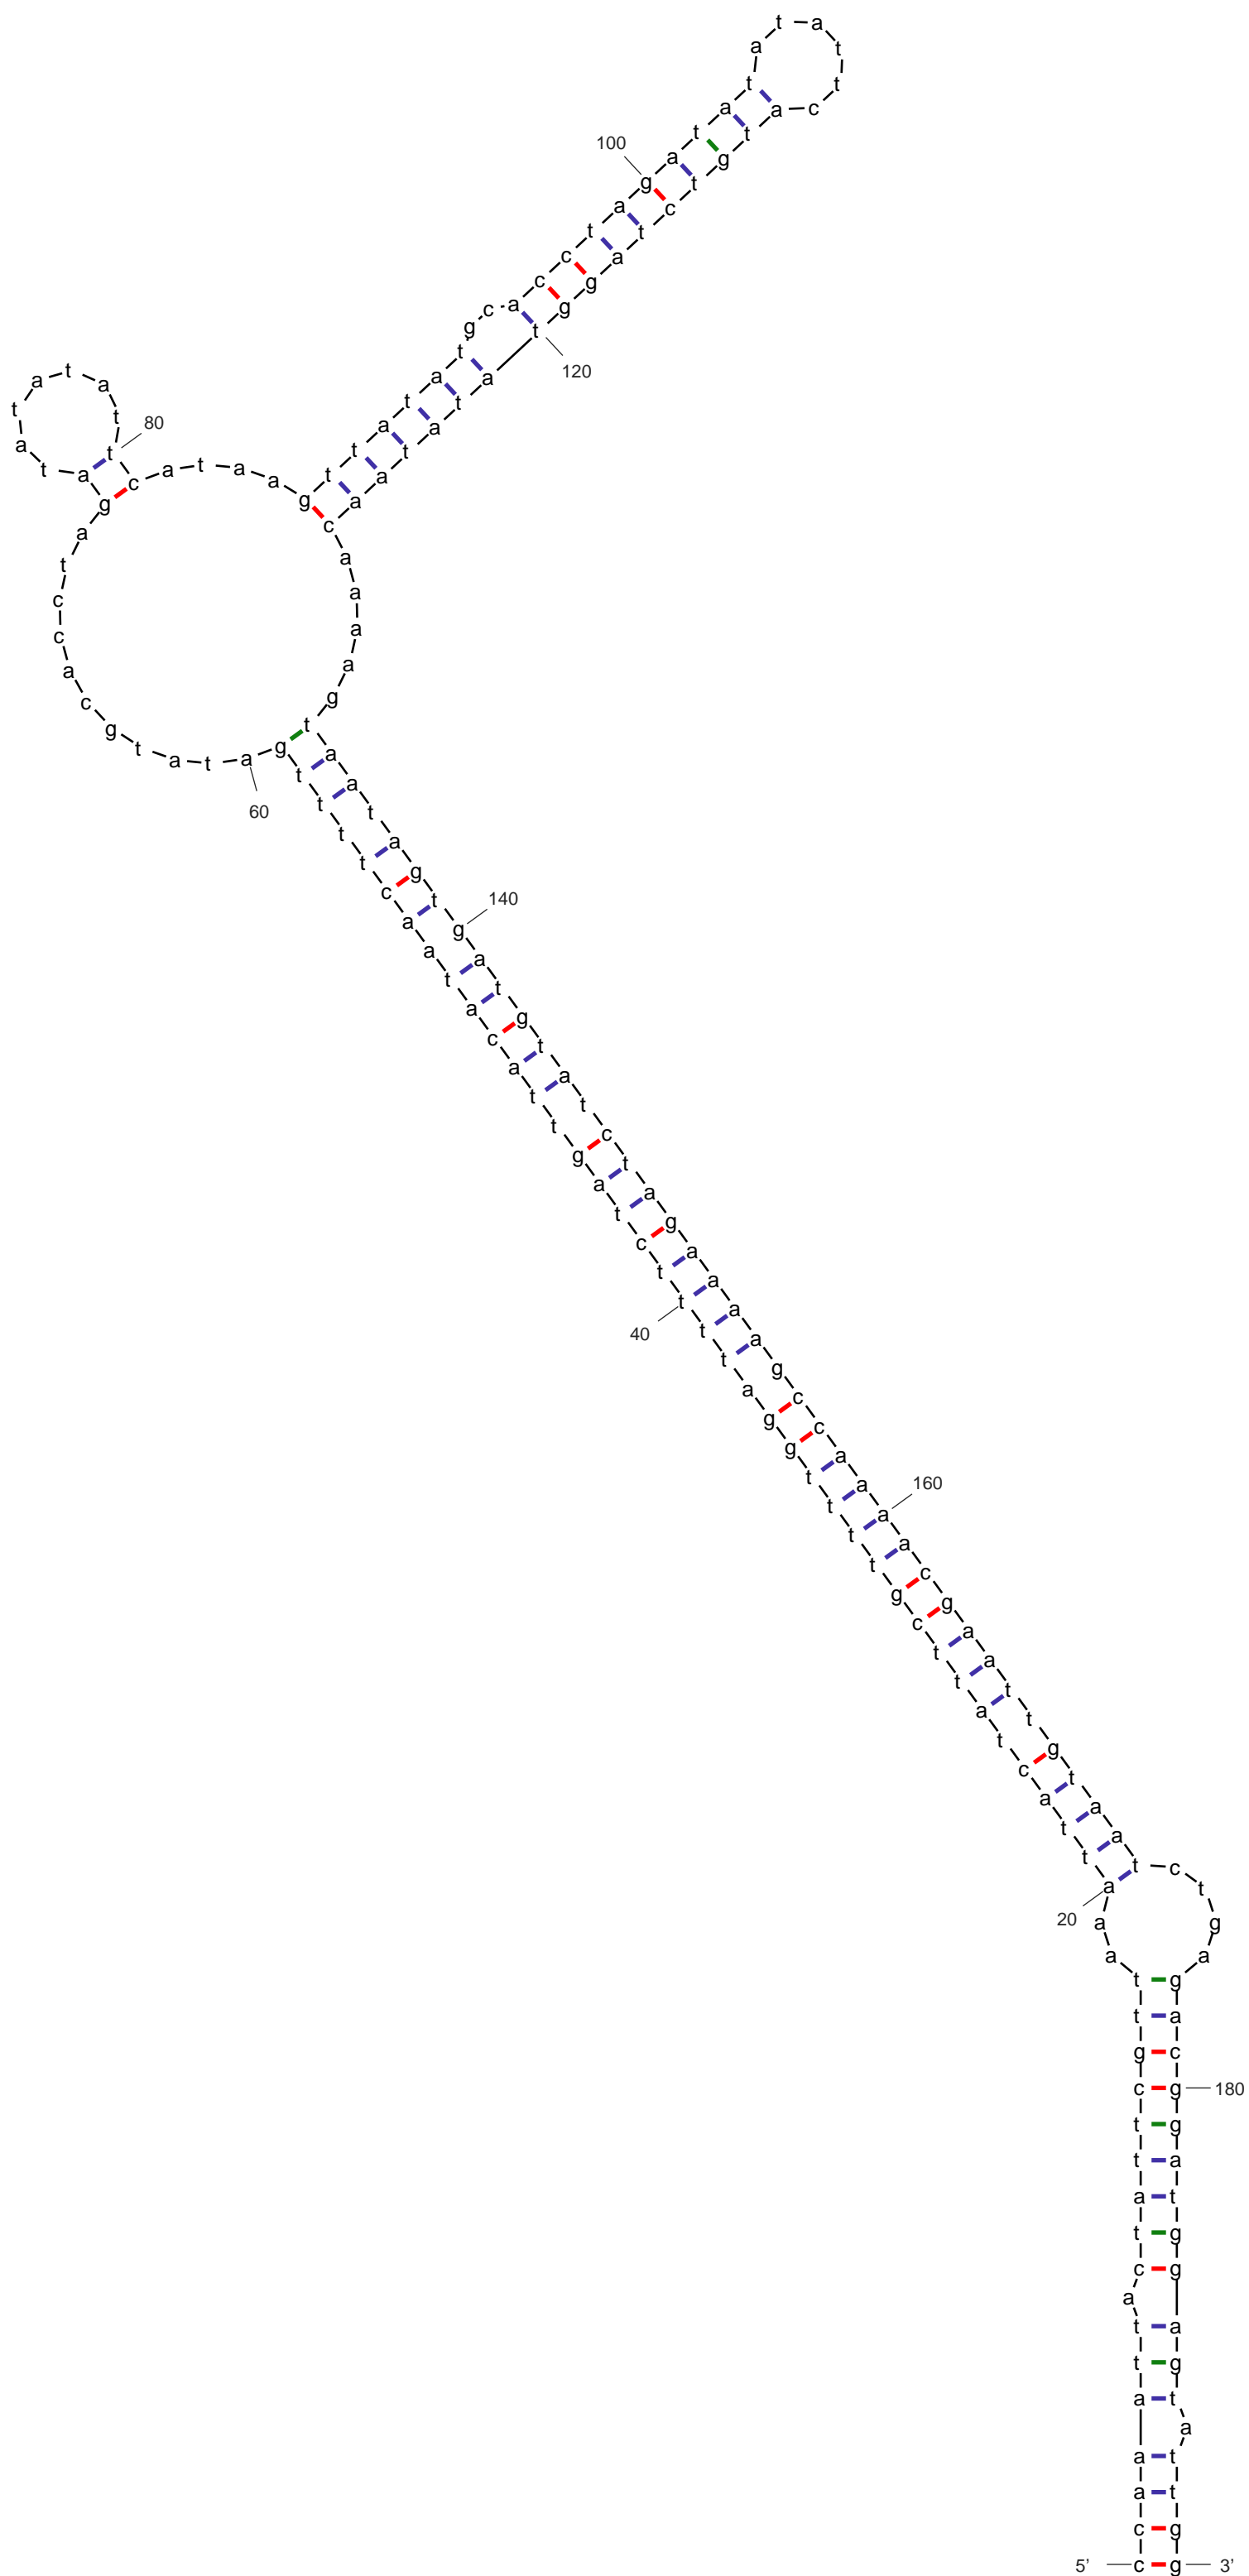

*dG = -64.8 sit\_novel\_miR60-3*



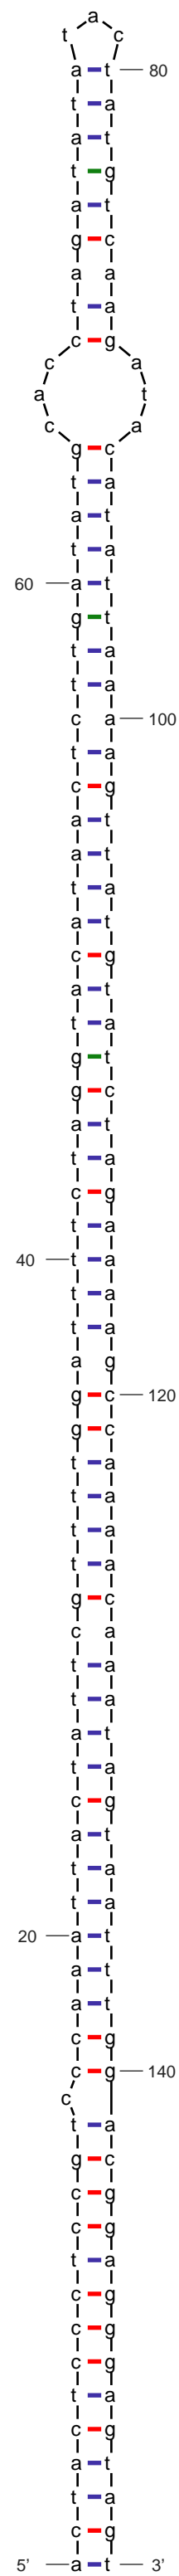

$dG = -89.4$  *sit\_novel\_miR60-4*

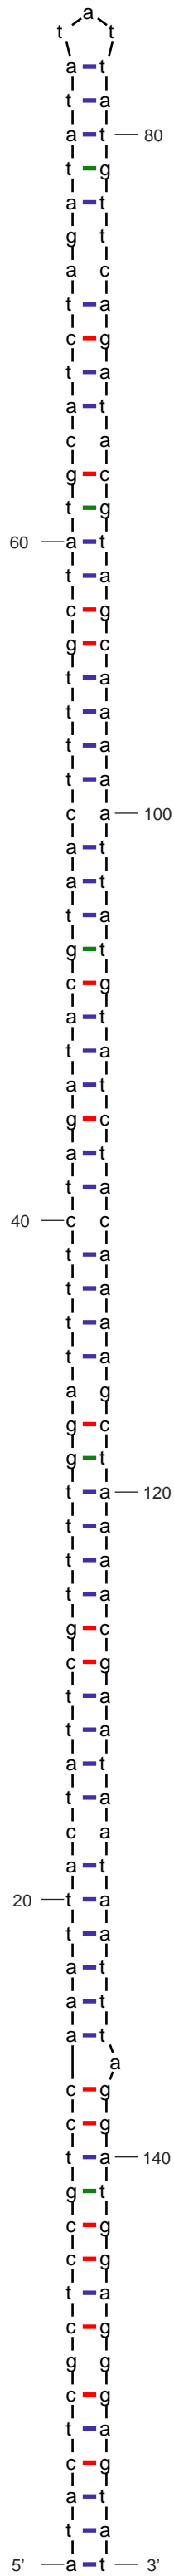

*dG = -75.5 sit\_novel\_miR60-5*

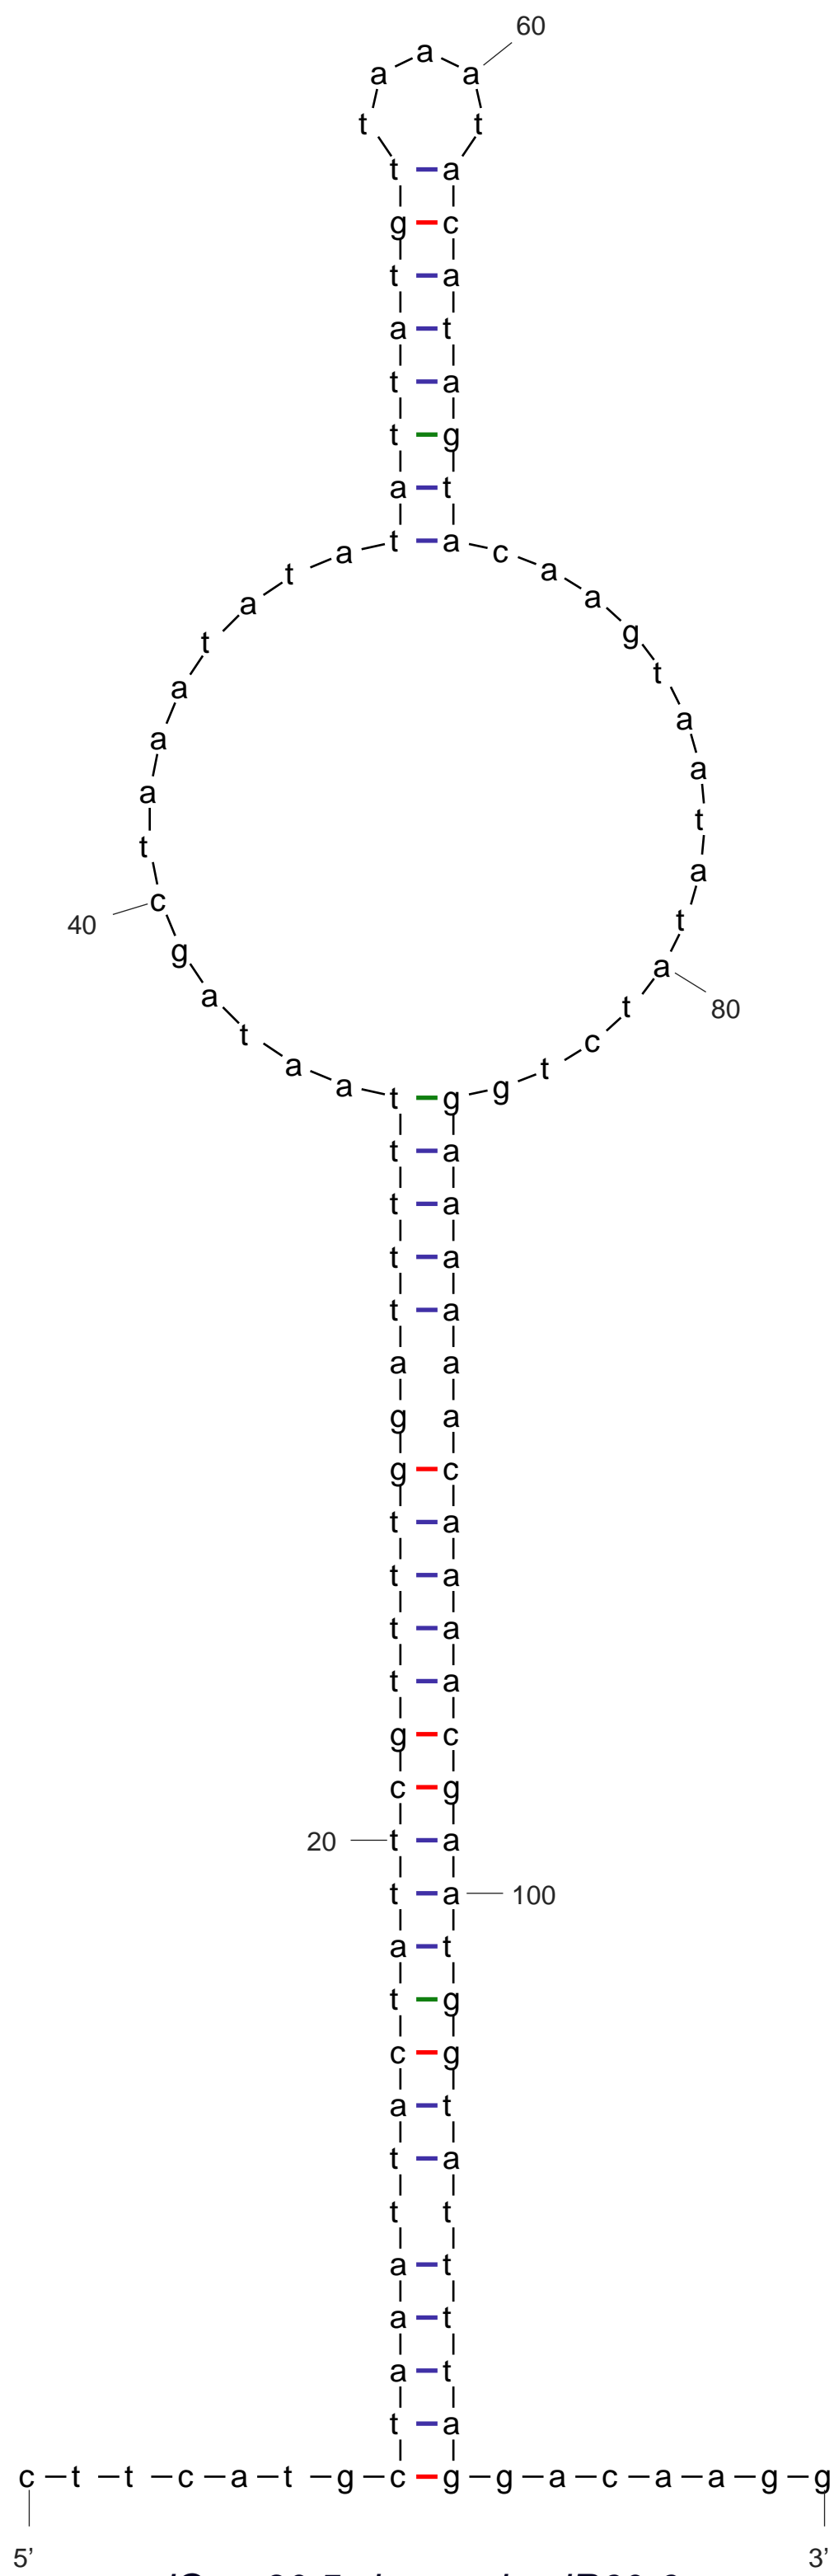

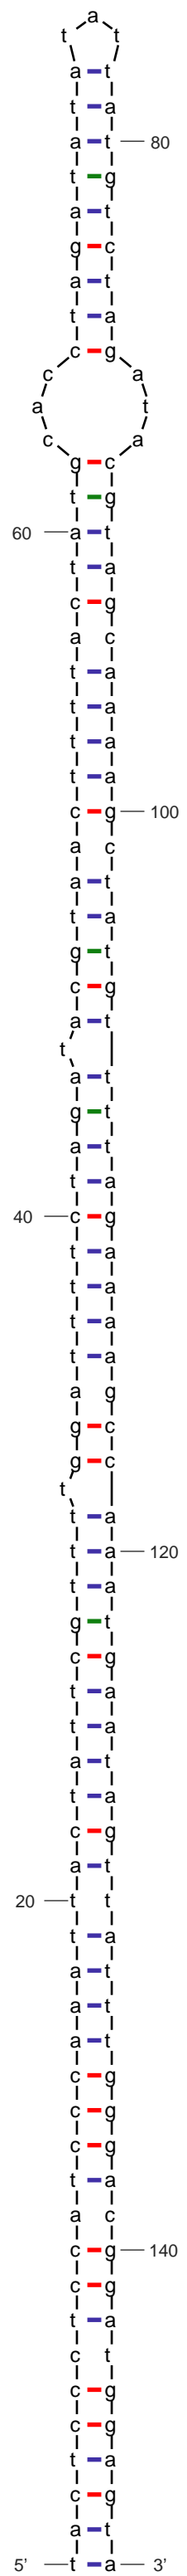

$dG = -68.7$  *sit\_novel\_miR60-7*

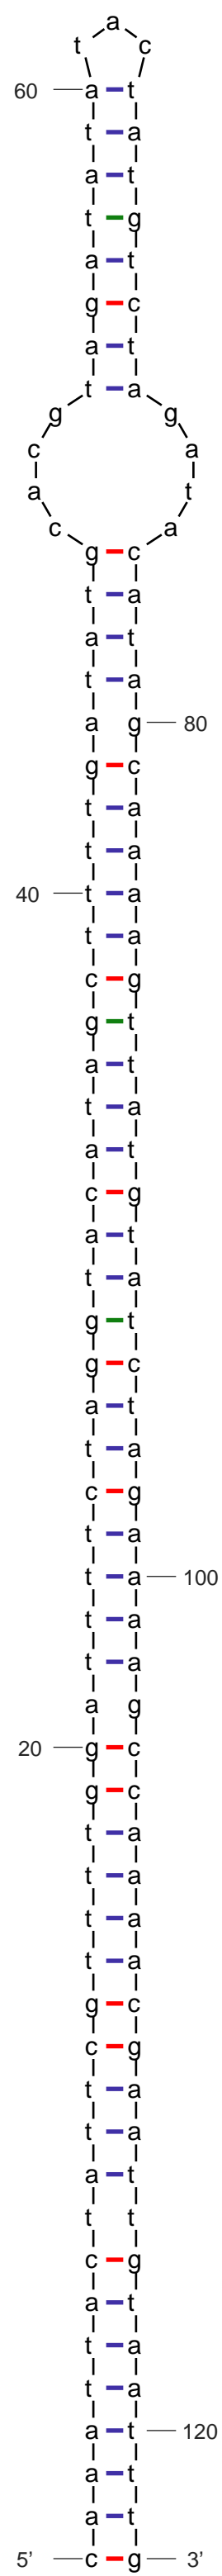

*dG = -60.6 sit\_novel\_miR60-8*

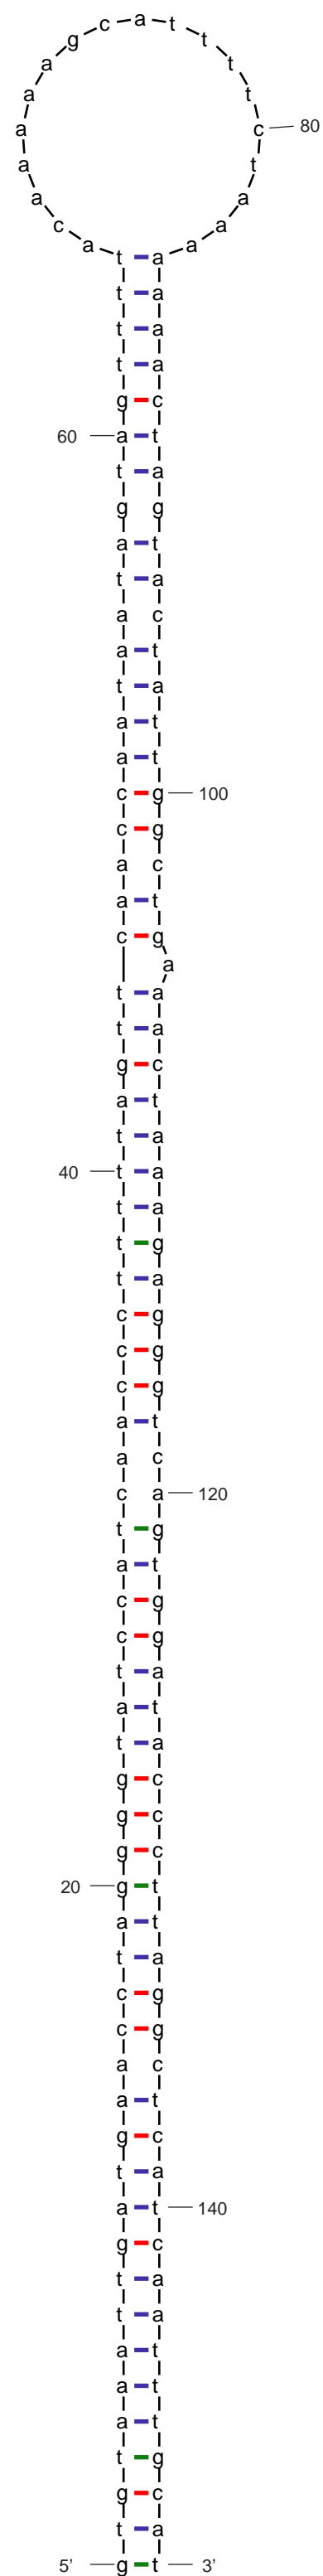

dG = -78.2 *sit\_novel\_miR61*

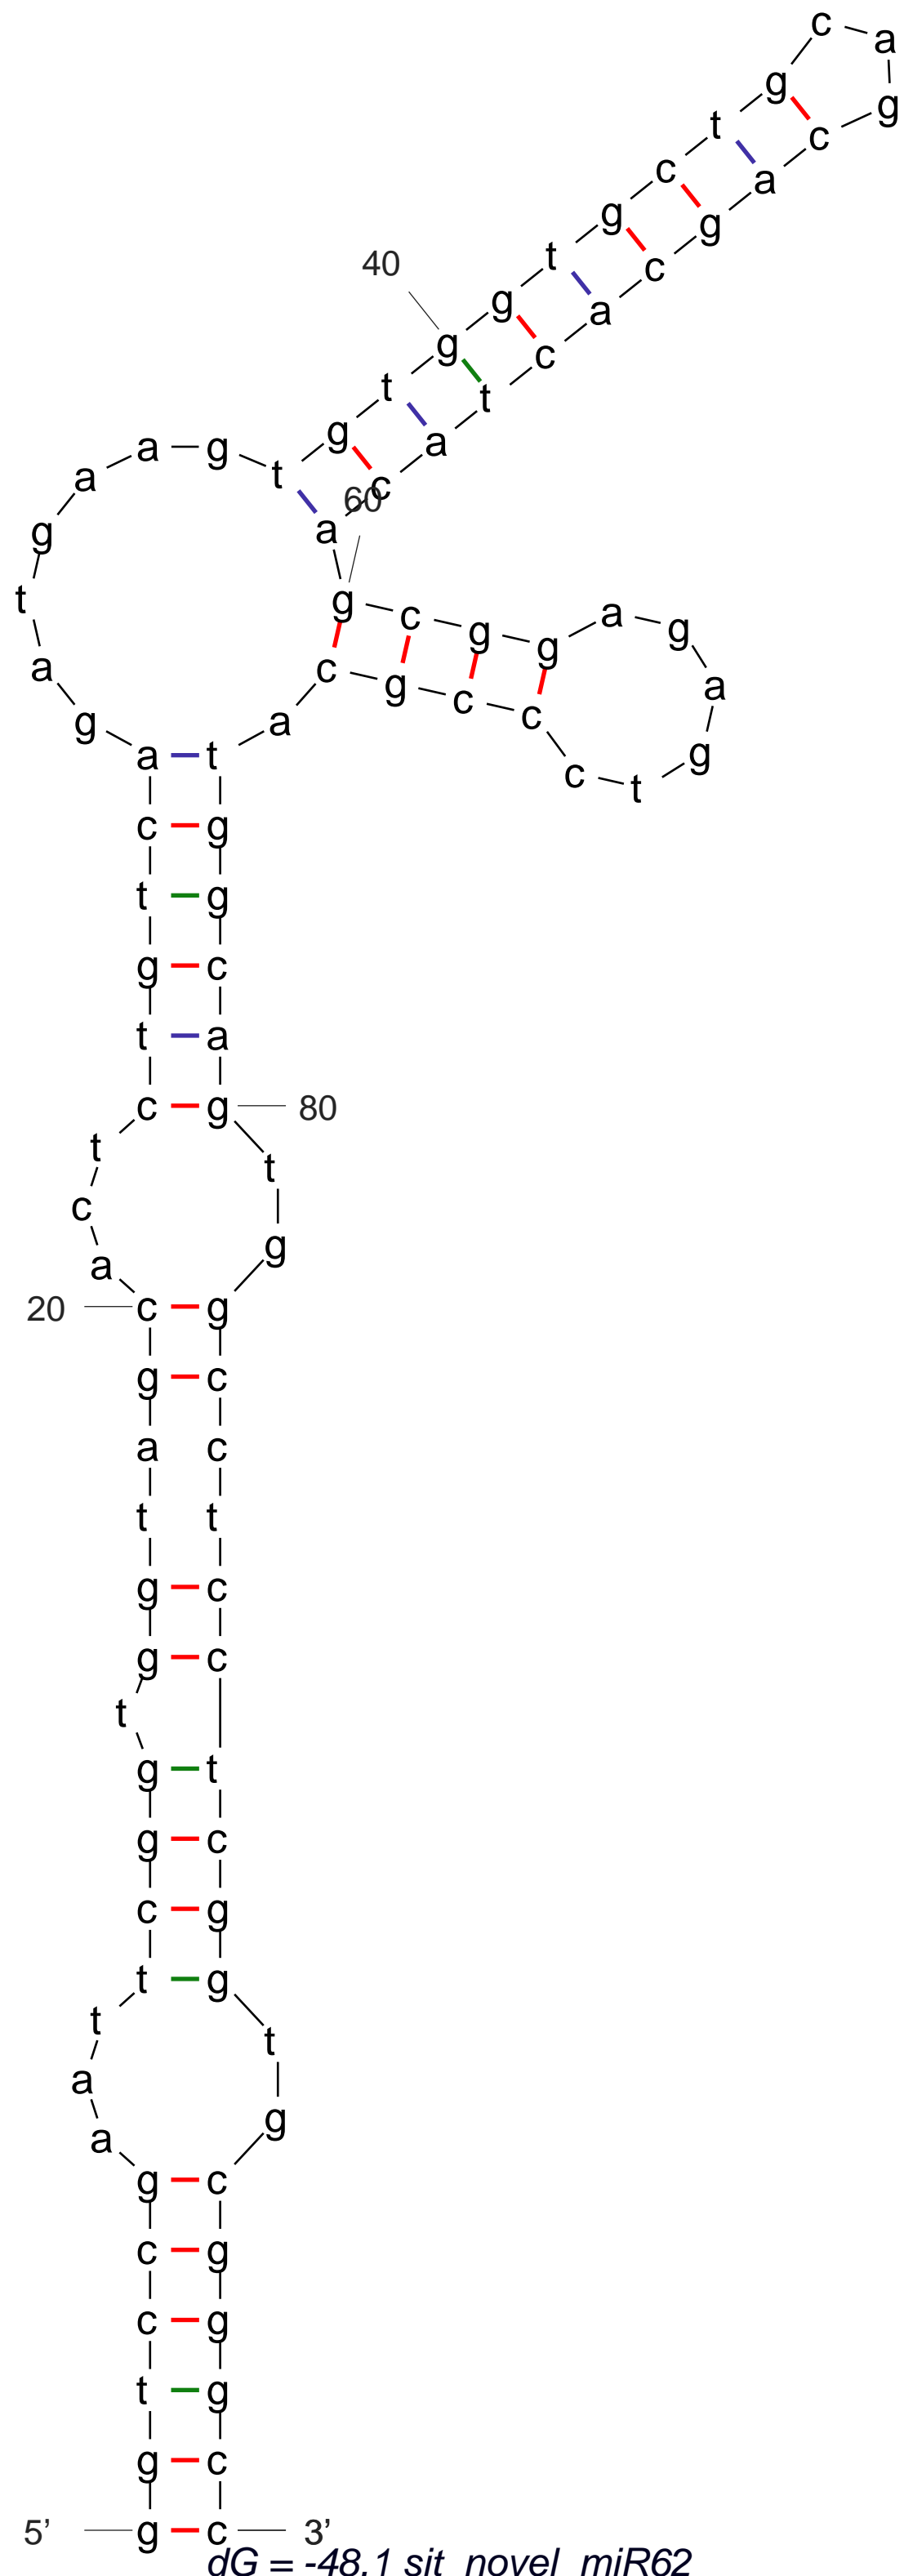

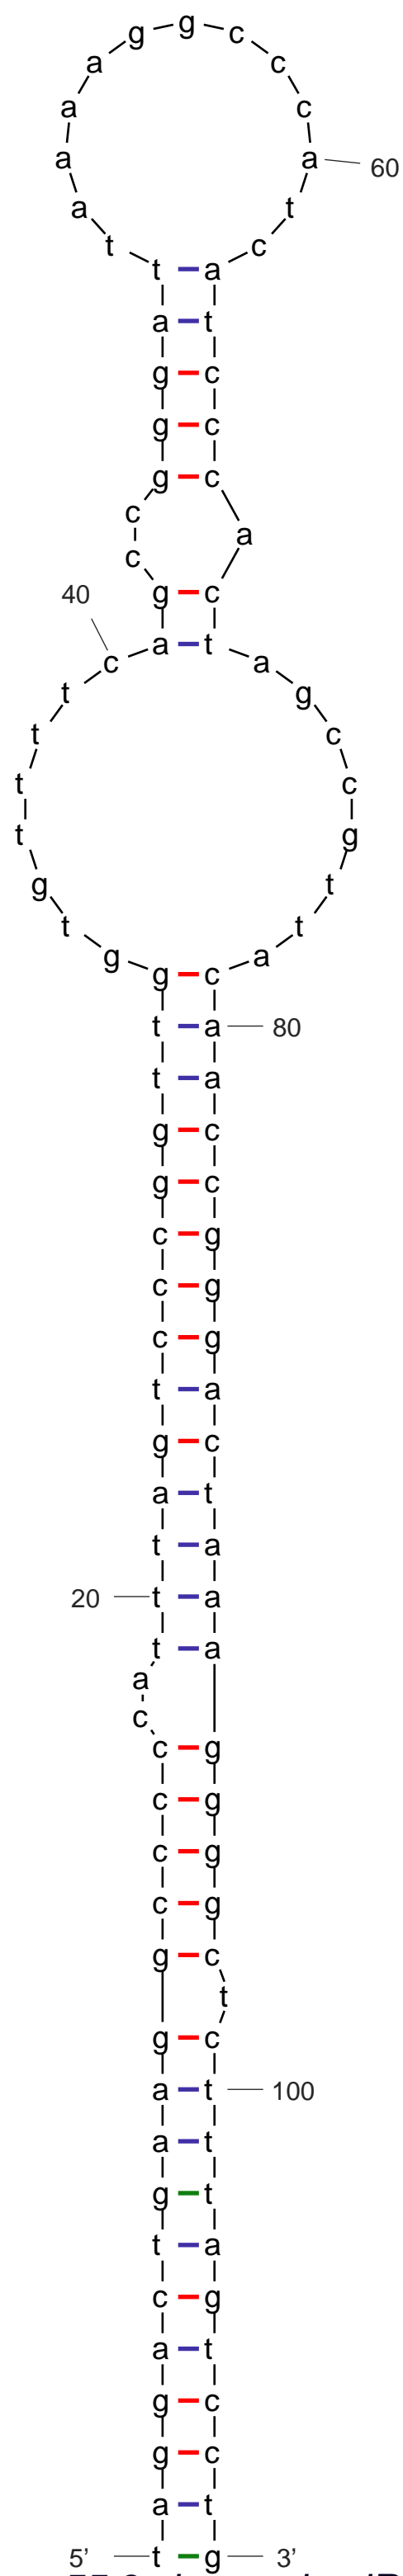

dG = -55.9 sit\_novel\_miR63
